## RESEARCH ARTICLE

# Interventions to improve primary healthcare in rural settings: A scoping review

Kris Aubrey-Basler<sup>1,2,3‡\*</sup>, Krystal Bursley<sup>2‡</sup>, Andrea Pike<sup>1,2</sup>, Carla Penney<sup>2</sup>, Bradley Furlong<sup>2</sup>, Mark Howells<sup>2</sup>, Harith Al-Obaid<sup>2</sup>, James Rourke<sup>1,2</sup>, Shabnam Asghari<sup>1,2,3</sup>, Amanda Hall<sup>1,2,3</sup>

**1** Discipline of Family Medicine, Faculty of Medicine, Memorial University, St. John's, Newfoundland and Labrador, Canada, **2** Primary Healthcare Research Unit, Faculty of Medicine, Memorial University, St. John's, Newfoundland and Labrador, Canada, **3** Division of Public Health and Applied Health Sciences, Faculty of Medicine, Memorial University, St. John's, Newfoundland and Labrador, Canada

‡ KAB and KB are contributed equally to this work as co-first authors.

\* [kaubrey@mun.ca](mailto:kaubrey@mun.ca)

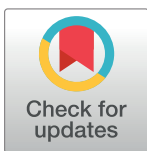

## Abstract

### Background

Residents of rural areas have poorer health status, less healthy behaviours and higher mortality than urban dwellers, issues which are commonly addressed in primary care. Strengthening primary care may be an important tool to improve the health status of rural populations.

### Objective

Synthesize and categorize studies that examine interventions to improve rural primary care.

### Eligibility criteria

Experimental or observational studies published between January 1, 1996 and December 2022 that include an historical or concurrent control comparison.

### Sources of evidence

Pubmed, CINAHL, Cochrane Library, Embase.

### Charting methods

We extracted and charted data by broad category (quality, access and efficiency), study design, country of origin, publication year, aim, health condition and type of intervention studied. We assigned multiple categories to a study where relevant.

### Results

372 papers met our inclusion criteria, divided among quality (82%), access (20%) and efficiency (13%) categories. A majority of papers were completed in the USA (40%), Australia (15%), China (7%) or Canada (6%). 35 (9%) papers came from countries in Africa. The most common study design was an uncontrolled before-and-after comparison (32%) and

## OPEN ACCESS

**Citation:** Aubrey-Basler K, Bursley K, Pike A, Penney C, Furlong B, Howells M, et al. (2024) Interventions to improve primary healthcare in rural settings: A scoping review. PLoS ONE 19(7): e0305516. <https://doi.org/10.1371/journal.pone.0305516>

**Editor:** Jennifer Yourkavitch, Independent, UNITED STATES OF AMERICA

**Received:** September 6, 2023

**Accepted:** June 1, 2024

**Published:** July 11, 2024

**Peer Review History:** PLOS recognizes the benefits of transparency in the peer review process; therefore, we enable the publication of all of the content of peer review and author responses alongside final, published articles. The editorial history of this article is available here: <https://doi.org/10.1371/journal.pone.0305516>

**Copyright:** © 2024 Aubrey-Basler et al. This is an open access article distributed under the terms of the [Creative Commons Attribution License](https://creativecommons.org/licenses/by/4.0/), which permits unrestricted use, distribution, and reproduction in any medium, provided the original author and source are credited.

**Data Availability Statement:** The data are all contained within the manuscript and its [Supporting information](#) files.

**Funding:** This study was funded by the Canadian Institutes of Health Research (grant # 141676) awarded to KAB. The funders (<https://cihr-irsc.gc.ca/e/193.html>) had no role in study design, data collection and analysis, decision to publish, or preparation of the manuscript.

**Competing interests:** KAB and JR are family physicians who previously practiced in rural areas. KAB, JR, and SA are rural health services researchers with an interest in the equity of health service distribution. The authors have no other disclosures to report.

only 24% of studies used randomized designs. The number of publications each year has increased markedly over the study period from 1-2/year in 1997–99 to a peak of 49 papers in 2017.

## Conclusions

Despite substantial inequity in health outcomes associated with rural living, very little attention is paid to rural primary care in the scientific literature. Very few studies of rural primary care use randomized designs.

## Introduction

The United Nations estimates that about 3.4 billion people worldwide live in rural areas [1]. Residents of these areas have poorer health status, are more likely to live in poor socio-economic conditions, demonstrate less healthy behaviours, and tend to have higher mortality rates than people who live in urban centres [1–6]. These disparities in health outcomes indicate a greater need for health services that address these factors, and these services are usually delivered under the umbrella of primary care [7]. Countries and regions with stronger primary care tend to have improved health outcomes, lower health system costs and reduced inequity in health [7, 8]. It is important to note that the term primary care has many definitions and is sometimes used interchangeably with the term primary healthcare. For the purposes of this scoping review, we aimed to adopt a broad definition to capture a wide range of primary care services. We used the Canadian Foundation for Healthcare Improvement (CFHI) policy document (Toward a Primary Care Strategy for Canada) to guide many of the definitions used in this review [9]. As such we adopted CFHI's definition of primary care: "an inclusive term to cover the spectrum of first-contact healthcare models from those whose focus is comprehensive, person-centered care, sustained over time, to those that also incorporate health promotion, community development and intersectoral action to address the social determinants of health" to serve as the working definition for this scoping review [9].

Despite increased needs, rural populations are not as well-served as their urban counterparts and they experience more difficulty accessing primary care [10]. Lack of access to primary care in rural areas is in part due to the difficulty of retaining physicians and other healthcare professionals in their communities [11]. Additionally, residents living in rural communities often have to travel in order to access healthcare. This can pose an added burden to individuals who do not have reliable transportation or have mobility issues. When travel is required to access services, it may mean people have to leave their communities and families and incur additional costs for accommodation and meals. Even when a person can access primary healthcare in their community, they may encounter additional barriers such as difficulty contacting the physician or clinic to schedule an appointment and long wait times for appointments [12]. Specialist care is even less equitably distributed than primary care, suggesting a greater need for services, such as an expanded scope of practice for rural primary care providers that can replace some of the care usually offered by specialists. The World Health Organization highlights that remote populations face significant health disparities compared to both urban and many rural areas due to their smaller size, isolation, and socioeconomic disadvantages [13]. Geographic isolation and sociocultural differences also intensify healthcare shortages in remote areas. Thus, addressing these challenges requires interventions focused on increasing healthcare access, ensuring equitable quality of care, and prioritizing patient-centered approaches.

Improving primary care is an important step toward improving health outcomes in rural and remote communities, and this will likely require a multifaceted approach. This scoping review synthesizes and categorizes studies that have evaluated interventions to improve primary care in rural and remote settings and it is the first comprehensive review to do so. Because of the breadth of literature we expected to find in terms of number of papers and diversity of study designs, interventions and outcomes, we elected to use scoping methodology with high-level data extraction rather than more detailed extraction and synthesis of a systematic review [14]. Following guidance for scoping reviews as described in our methods below, the purpose of this review is to provide an overview of the types of available evidence regarding interventions to improve primary care in rural and remote settings and identify the key characteristics of this body of literature (e.g., the health topics and interventions studied), health topic areas ready for systematic review, and knowledge gaps.

## Method

### Design

We used the refined Arksey and O'Malley [15] six-stage framework to structure our methods [16]. We followed the Preferred Reporting Items for Systematic reviews and Meta-Analyses extension for Scoping Reviews (PRISMA-ScR) checklist and the Johanna Briggs Institute manual to enhance review quality and reporting [14, 17].

**Stage 1: Developing the research question.** We were interested in describing all studies that reported on the evaluation of a program or intervention designed to improve health care and that was implemented in a rural or remote primary care setting. We organized the papers by the outcomes studied, according to three broad categories listed by a prominent primary care policy document [9]. We assigned papers to multiple categories where appropriate:

1. Quality of primary care: We classified studies addressing healthcare quality loosely based on the Institute of Medicine's "domains of health care quality [18]." The efficiency domain was further divided and included in a separate heading below.
  - a. Evidence-based practice
  - b. Clinical outcomes
  - c. Patient experience
  - d. Equity of care
  - e. Patient safety
2. Access to primary care: Multiple policy documents recommend that patients have access to a regular, identifiable primary care provider or team and timely access to primary care through arrangements that facilitate 24/7 access to appropriate services [9, 13, 19]. We thus subdivided this statement into the following two access topics:
  - a. Access to a primary care provider
  - b. Access to primary care services
3. Efficiency of primary care: The primary care system should continually seek to reduce waste and cost of supplies, equipment, space, capital, ideas, time and opportunities [9]. This broad category includes the following outcome variables:
  - a. Wait Times

- b. Healthcare utilization
- c. Costing and cost-effectiveness

*Setting.* There is broad disagreement among researchers, policy makers, and community members about the best definition of rural, and the appropriate definition likely varies with the circumstances [20]. To maximize inclusiveness for this review, we have elected to accept any program described as rural or remote by the paper's authors. As described in the introduction we used the CFHI's definition of primary care, "an inclusive term to cover the spectrum of first-contact healthcare models from those whose focus is comprehensive, person-centered care, sustained over time, to those that also incorporate health promotion, community development and intersectoral action to address the social determinants of health" as the working definition for this review [9]. This definition allows for a broad range of interventions for inclusion; examples of interventions that were included and excluded following this definition can be found in Table 1. Additionally, in piloting this definition during our screening process, we realized reporting was not always clear and we amended the definition to maximise study inclusion to also accept any program described as being implemented in primary care by the paper's authors.

*Study design and language.* The search was limited to papers written in English. All randomised and non-randomised experimental or observational designs were included (e.g., randomised controlled trials, controlled before-after studies, uncontrolled before-after studies, interrupted time series and observational/cohort studies). Non-experimental studies such as descriptive studies or chart reviews were excluded. We developed a protocol a priori but did not publish prospectively.

**Table 1. Screening template for full text study review.**

| Inclusion criteria                                                                                                                                                                                                                                                                                                                                                                                                                                                                                      | Exclusion criteria                                                                                                                                                                                                                                                                 |
|---------------------------------------------------------------------------------------------------------------------------------------------------------------------------------------------------------------------------------------------------------------------------------------------------------------------------------------------------------------------------------------------------------------------------------------------------------------------------------------------------------|------------------------------------------------------------------------------------------------------------------------------------------------------------------------------------------------------------------------------------------------------------------------------------|
| Population: Any patients                                                                                                                                                                                                                                                                                                                                                                                                                                                                                | Population: No exclusions                                                                                                                                                                                                                                                          |
| Setting: Primary care—if the intervention is delivered: <ul style="list-style-type: none"> <li>• by a family physician (either individually or as part of a comprehensive/collaborative care team) or by another primary care provider or</li> <li>• was delivered as part of a public health community intervention such as screening but involved a primary care service at some part of the delivery or</li> <li>• in a setting that is described as primary care in the individual study</li> </ul> | Setting: Primary care—if the intervention is delivered: <ul style="list-style-type: none"> <li>• within normal hospital services, emergency medicine, paramedicine, dental care</li> </ul> Note: exceptions are if the primary care service/provider is situated within a hospital |
| Setting: Rural/remote geographic areas <ul style="list-style-type: none"> <li>• as defined in each paper</li> </ul>                                                                                                                                                                                                                                                                                                                                                                                     | Setting: Rural/remote geographic areas <ul style="list-style-type: none"> <li>• urban geographic area</li> </ul>                                                                                                                                                                   |
| Study designs: All randomised and non-randomised experimental or observational study designs <ul style="list-style-type: none"> <li>• randomised controlled trials</li> <li>• controlled before-after studies</li> <li>• uncontrolled before-after studies</li> <li>• interrupted time series</li> <li>• observational/cohort studies</li> </ul>                                                                                                                                                        | Study designs: All non-experimental studies (those without a comparison group) <ul style="list-style-type: none"> <li>• descriptive studies</li> <li>• chart reviews</li> </ul>                                                                                                    |
| Outcomes: <ul style="list-style-type: none"> <li>• Access to primary care</li> <li>• Quality of care</li> <li>• Efficiency/cost of care</li> </ul>                                                                                                                                                                                                                                                                                                                                                      | Outcomes: Any outcomes unrelated to access, quality or efficiency.                                                                                                                                                                                                                 |

<https://doi.org/10.1371/journal.pone.0305516.t001>

**Stage 2: Identifying relevant studies.** An experienced information specialist completed an electronic literature search for articles reporting the evaluation of a program or intervention to improve rural healthcare, initially between January 1, 1996 and December 30, 2022 and cataloged in the following databases: Cumulative Index to Nursing and Allied Health Literature (CINAHL), the Cochrane Library, Embase, and PubMed. A sample electronic search strategy is included in [S1 Appendix](#).

**Stage 3: Study selection.** Articles were downloaded to Covidence systematic review software [21] and duplicates removed. Initial screening of titles and abstracts (and full-text review) was completed by two reviewers independently using pre-specified eligibility criteria ([Table 1](#)). During both these screening stages, a third reviewer mediated disagreements to reach a final decision about study inclusion.

**Stage 4: Charting the data.** Data extraction from each paper was initially completed by one reviewer (MH, HO, BF, CP) and double checked by a second author (KB, AP, BF) using a data extraction template. Discrepancies were reviewed with a senior author (AH). Data related to study characteristics, publication year, country, study design, study aim, intervention description, and types of outcomes assessed including assessment methods and measurement tools was extracted verbatim. The information was coded where possible; the intervention description was assigned a category code that was defined by the author team after reviewing all interventions descriptions for overarching themes as described in [Table 2](#), and the outcomes were coded into one of the twelve possible outcomes within the three major categories as defined on page 4 under the subsection “Stage 1: Developing the Research Question”.

**Stage 5: Collating, summarizing and reporting the results.** An overall summary of all included studies was conducted using descriptive statistics to summarize study characteristics, evaluation characteristics and types of outcome categories assessed. For each of the three outcome categories (i.e., access, quality and efficiency), studies were summarised together according to the sub-outcome measured within that category. For each sub-outcome, a tabular summary of the individual study characteristics, aim, intervention code and description and the outcome assessment information were provided. Where applicable, the tabular summaries are organised by the health topic studied. Due to the large amount of data, we have included these tabular summaries in the online supplementary files. Consistent with guidance on scoping reviews, we did not appraise methodological quality or risk of bias in the included articles [14, 15].

In addition to summarizing study characteristics and health topic areas covered within each of the main outcomes, we also completed a content analysis for each outcome category to provide readers with a high-level content summary, organized by health topic. For this analysis, we included health topics that were assessed in three or more studies. We also assessed this literature for its readiness for systematic or in-depth scoping review and to identify knowledge gaps—those areas where additional research is required. The criteria we used to make these judgements is presented in [Box 1](#).

**Stage 6: Stakeholder engagement.** This review is a product of consultation between one of our authors (JR) and the Atlantic Canadian premiers and was completed with guidance from the Atlantic Canadian Ministries of Health. In an effort to progress on evidence-informed rural health policy, these stakeholders were interested to know the overall state of science regarding rural primary care. After compiling the results of the review, members of our team met with additional health policy and programming stakeholders to review the broad state of rural primary healthcare knowledge. In so doing, they also helped us determine areas within the broader body of literature where a deeper, narrative review of the literature would be helpful, which our team will focus on in several future planned reviews.

Table 2. Definition of intervention codes.

| Intervention Code                              | Definition                                                                                                                                                                                                                                                                                                                                     |
|------------------------------------------------|------------------------------------------------------------------------------------------------------------------------------------------------------------------------------------------------------------------------------------------------------------------------------------------------------------------------------------------------|
| Medical education (selective recruitment)      | A medical education program that is tailored to training rural physicians OR has selective criteria for accepting rural students OR offers a program tailored to recruit and retain rural physicians                                                                                                                                           |
| Medical education (exposure to rural practice) | A medical education program for training in family medicine or that integrates rural curriculum content with the opportunity to train in a rural setting                                                                                                                                                                                       |
| Financial incentive                            | The use of scholarships or “loan-forgiveness” for prospective medical students as a method of recruitment to a particular medical education program OR offering a financial incentive to physicians to encourage them to practice and remain in a rural area OR using a financial incentive to promote adherence to evidence-based guidelines. |
| Well-being                                     | The introduction or development of a program to support the social and psychological well-being of practicing rural physicians as a method to encourage them to continue practicing in rural areas (including improving working conditions).                                                                                                   |
| Expanded scope of practice                     | Health care providers taking on a new skill or provide a new service (e.g., nurse taking on a responsibility normally covered by a family doctor or a family doctor providing more specialized care).                                                                                                                                          |
| Telehealth or virtual care                     | Using telehealth or other virtual systems to administer primary care appointments OR using technology to allow patients to access their health information or book/have appointments with healthcare professionals online.                                                                                                                     |
| Coordination/referral pathways                 | Increase referral to existing services by improving awareness or easing the referral process, etc.                                                                                                                                                                                                                                             |
| Training of lay-persons                        | Recruiting and training members of the community to provide a set of health care and/or health care coordination services for patients in the community OR to implement best practices for a particular health topic/condition.                                                                                                                |
| Healthcare provider training                   | Healthcare providers completing additional education on evidence-based practices for a particular health topic.                                                                                                                                                                                                                                |
| Transportation                                 | Implementing a new transportation service to improve access or care for rural patients.                                                                                                                                                                                                                                                        |
| Decision support                               | Intervention to assist healthcare provider decision making and/or inform healthcare providers of best practices regarding a healthcare topic or condition.                                                                                                                                                                                     |
| Reorganization of services                     | Reorganization of healthcare services to better align with evidence-based guidelines or to use a previous service or treatment in a novel way to optimize care.                                                                                                                                                                                |
| Increasing staff resources                     | Increase of staff allocation or improved clinic resources to improve a service.                                                                                                                                                                                                                                                                |
| Patient education/navigation                   | Patients completing additional education on evidence-based practices for a particular health topic or condition relating to their own health. This could include group or individual sessions with a knowledgeable healthcare provider, or the distribution of educational materials.                                                          |
| Screening                                      | Increased or added screening measures in order to adhere to guidelines                                                                                                                                                                                                                                                                         |
| Audit and feedback                             | Analyzing a targeted behaviour/performance over a specific period and providing feedback on the behaviour/performance to health professionals.                                                                                                                                                                                                 |
| Implementing a new service                     | Implementing a novel service to address a healthcare need or improve upon previous care.                                                                                                                                                                                                                                                       |

**Note:** Intervention codes were defined by the review team. They were based on similarities among interventions included in the papers and refined to produce the best overall descriptor code and definition.

<https://doi.org/10.1371/journal.pone.0305516.t002>

## Results

The literature search returned 6,592 citations; 6,220 of those were excluded (Fig 1) leaving 372 articles for data extraction and synthesis [22–390]. Details on article characteristics are presented in S2 Appendix. Briefly, the majority of articles were published after 2010 with an

**Box 1: Judgement criteria to assess directions for future research.**

|                                               |                                                                                                                                                                                                                                                                                                                                                                                                                                                  |
|-----------------------------------------------|--------------------------------------------------------------------------------------------------------------------------------------------------------------------------------------------------------------------------------------------------------------------------------------------------------------------------------------------------------------------------------------------------------------------------------------------------|
| Systematic review                             | We recommended systematic review when we found at least three studies on a health topic with apparent similarity in interventions and outcomes that could be used to form a clear PICO question.                                                                                                                                                                                                                                                 |
| In-depth scoping review                       | We recommended in-depth scoping review for health topics for which clear PICO questions cannot be easily discerned (i.e., there is high variation across outcomes and interventions across the identified studies).                                                                                                                                                                                                                              |
| Additional research required (knowledge gaps) | We recommended additional research for topic areas in which:<br>1) higher quality (controlled) studies are feasible but not evident in the literature base<br>2) controlled studies may not be feasible, but for which the quality of uncontrolled studies could be improved<br>3) there were few studies all of which were investigating different interventions and outcomes<br>4) there were very few studies evident in the literature base. |

increase in the number per year beginning in 2015 that peaked in 2017 before beginning to decline (Fig 2). The majority were conducted in the United States (40%), Australia (15%) and China (7%) (Table 3). Many study designs were used to evaluate interventions, the most common of which were uncontrolled before-and-after (32%) followed by randomized trials (24%), prospective or retrospective cohort (18%), controlled before-and-after (11%), and cross-sectional studies (11%). In terms of outcome categories, the majority of studies (n = 306) assessed outcomes relating to quality of care focusing on improving desired health outcomes for patients and adherence to evidence-based standards (S3 Appendix). Seventy-six studies assessed access to primary care largely focusing on recruitment and retention of family physicians and access to services (S4 Appendix). Forty-seven studies assessed outcomes related to improving the efficiency of primary care services in rural areas (e.g., cost of delivery, healthcare use; S5 Appendix). A description of the studies for each outcome category is presented in the following sections.

### Quality of care

Three-hundred and six articles (82%) reported on interventions aimed at improving the quality of primary care provided in a rural/remote setting. Seventy-two percent (n = 230) focused on improving the health outcomes of patients; 30% (n = 112) aimed to improve adherence to or adoption of evidence-based practices, 11% (n = 34) aimed to improve quality of care via enhancing patient experience, 1% (n = 4) studies aimed to improve equity of care, and only one study assessed patient safety. A detailed breakdown of all intervention types, study designs, individual study outcomes, and outcome measurements for quality-of-care studies can be found in S3–S7 Appendices. We have summarized the data in the following sections.

**Evidence-based practice (n = 112).** Nearly three quarters of the 112 articles that aimed to improve quality of care via improving adherence to/adoption of evidence-based practices were published between 2010–2022. They were conducted in a broad range of countries, but just over half were conducted in either the United States (n = 35) or Australia (n = 20). Provider education/training (n = 35), improving coordination/referral pathways (n = 14), and patient education (n = 12) were the most frequent interventions employed. The studies were largely uncontrolled before-after studies (n = 42), randomized controlled trials (n = 32). The most commonly studied guidelines or recommendations were related to diabetes (n = 21), mental health care (n = 13), cancer screening (n = 12). Table 4 provides a content summary analysis for the nine health topics that were assessed in three or more studies. Of note, several papers

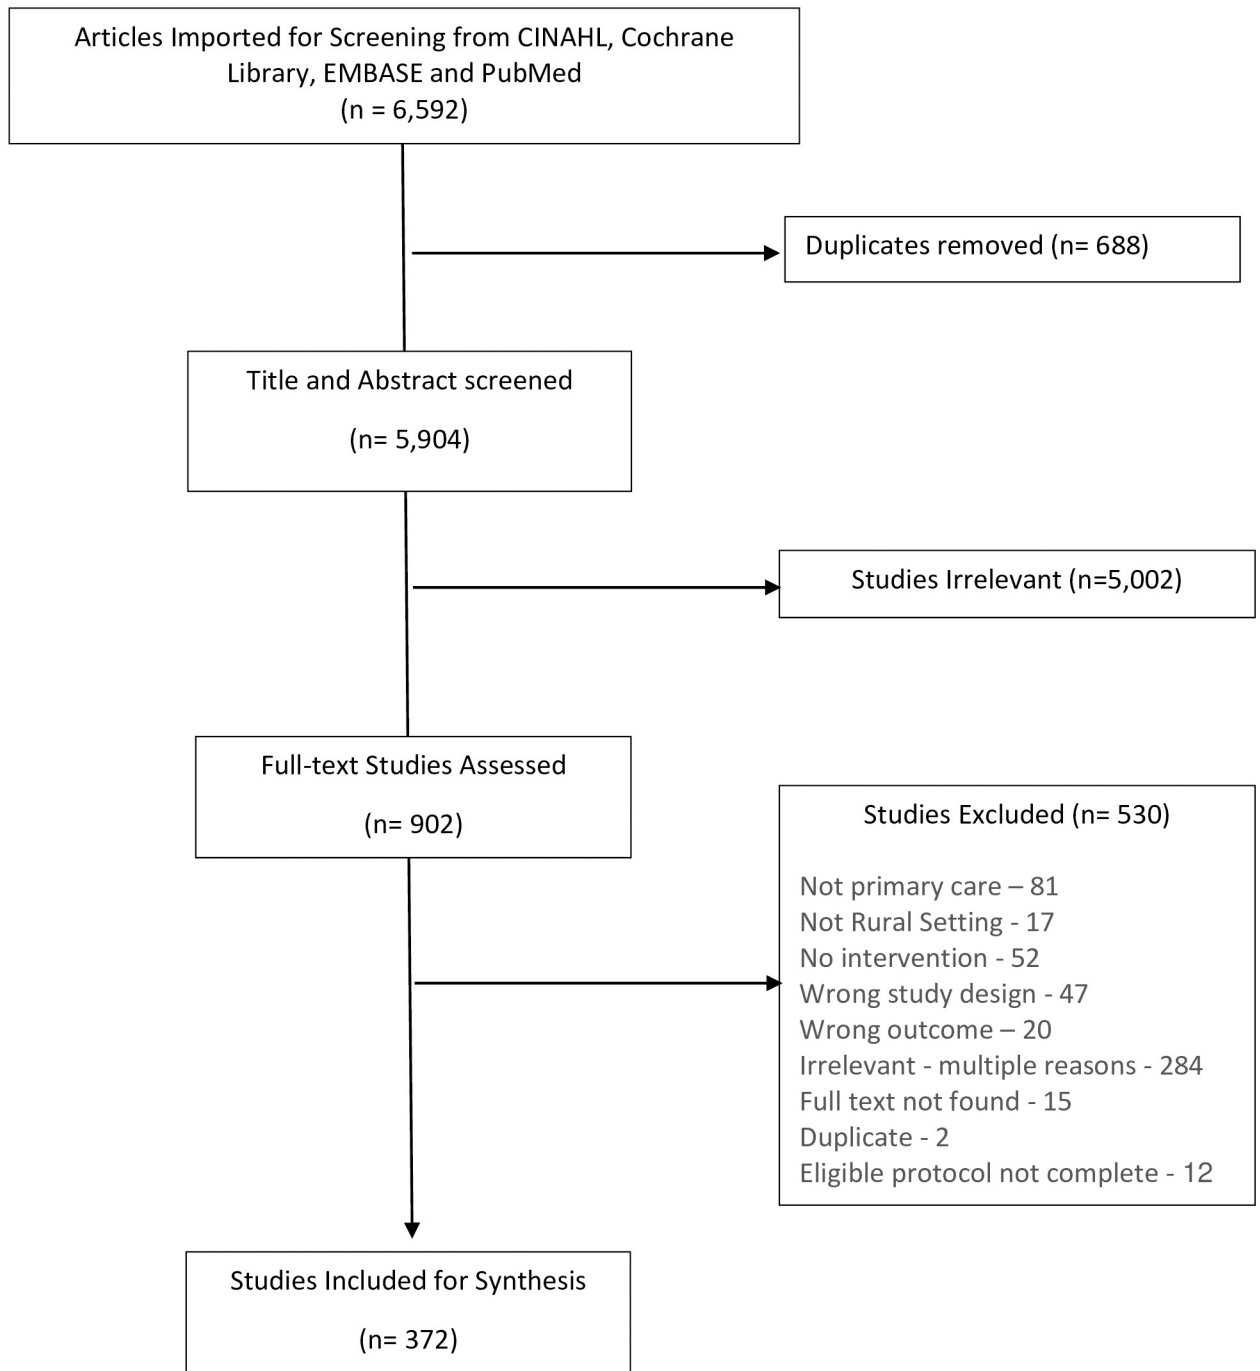

**Fig 1. Prisma flow diagram depicting flow of studies through the screening process.**

<https://doi.org/10.1371/journal.pone.0305516.g001>

did not assess a specific health topic (e.g., they were studying an intervention applicable to any condition). Information on these studies can be found in [S3 Appendix](#). We judged three topics to be ready for systematic review: cancer (n = 12), CVD (n = 5) and respiratory infections (n = 4). Meta-analysis for each of these topics may not be possible and they would therefore



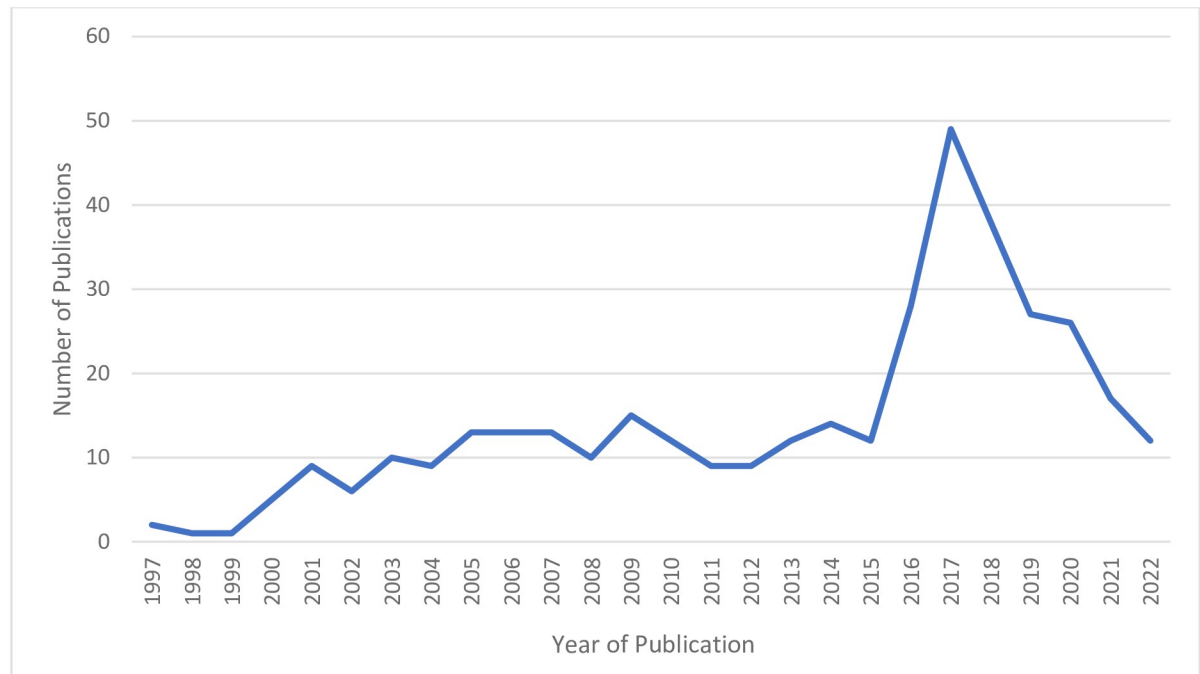

**Fig 2. Number of publications by year.**

<https://doi.org/10.1371/journal.pone.0305516.g002>

require some degree of narrative synthesis based on differences in interventions. We judged an additional 4 topic areas that would benefit from in-depth scoping review including diabetes ( $n = 21$ ), mental health ( $n = 13$ ), asthma ( $n = 6$ ) and pregnancy-related studies ( $n = 4$ ). We believe additional research is required for chronic disease ( $n = 3$ ) and HIV ( $n = 3$ ). For both these topic areas the studies we found in both areas were not testing similar interventions or assessing similar outcomes. Additionally, we found very few studies in 23 topic areas including antibiotic prescribing, atrial fibrillation, back pain, chronic lung disease, COPD, dental care, epilepsy, hypertension, malaria, maternal and child health, neonatal care, obstetrics, palliative care, PCOS, post-abortion care, preventative care, sexually-transmitted infections, skin infections, sleep, speech impairments, surgery, vaccinations, vision impairments.

**Clinical outcomes ( $n = 230$ ).** Just over two thirds of the 158 studies focused on improving quality of care via improvements to clinical outcomes were published between 2010 and 2022. The studies were conducted in 45 different countries, with the majority originating in the United States ( $n = 100$ ), Australia ( $n = 30$ ), China ( $n = 16$ ) and Canada ( $n = 11$ ). Interventions commonly involved educating patients on evidence-based practices for a particular health topic or condition relating to their own health ( $n = 43$ ), reorganizing health services to optimize care ( $n = 29$ ), expanding the scope of practice for healthcare professionals ( $n = 24$ ), upskilling or training healthcare professionals on evidence-based practices for a particular topic ( $n = 22$ ), implementing a new service ( $n = 14$ ), and improving co-ordination/referral pathways ( $n = 14$ ). Some papers examined a single intervention while others examined a combined intervention (e.g., provider education/training + patient education), and papers may therefore be counted multiple times in the list above. The most common conditions included diabetes ( $n = 48$ ), mental health ( $n = 34$ ), hypertension ( $n = 13$ ), and cardiovascular disease ( $n = 12$ ). The most common study designs included uncontrolled before-after ( $n = 75$ ) and randomized controlled trials ( $n = 68$ ). Other designs reported included controlled before-after studies

**Table 3. Number of studies by economic status, country, and geographic region.**

| Economic status       | East Asia and Pacific (N = 95)                                                                | Europe and Central Asia (N = 34)                                                                                                                                                            | Latin America and the Caribbean (N = 10)                                                                                       | Middle East and North Africa (N = 11)            | North America (N = 172)                    | South Asia (N = 14)                                 | Sub-Saharan Africa (N = 40)                                                                                                                        |
|-----------------------|-----------------------------------------------------------------------------------------------|---------------------------------------------------------------------------------------------------------------------------------------------------------------------------------------------|--------------------------------------------------------------------------------------------------------------------------------|--------------------------------------------------|--------------------------------------------|-----------------------------------------------------|----------------------------------------------------------------------------------------------------------------------------------------------------|
| Low (N = 15)          |                                                                                               |                                                                                                                                                                                             |                                                                                                                                |                                                  |                                            |                                                     | Burkina Faso (N = 5)<br>Ethiopia (N = 4)<br>Mali (N = 1)<br>Niger (N = 1)<br>Rwanda (N = 2)<br>Uganda (N = 2)                                      |
| Lower-Middle (N = 33) | Philippines (N = 1)                                                                           |                                                                                                                                                                                             | Bolivia (N = 1)<br>Haiti (N = 1)                                                                                               | Egypt (N = 1)<br>Iran (N = 1)<br>Lebanon (N = 1) |                                            | India (N = 11)<br>Nepal (N = 2)<br>Pakistan (N = 1) | Cameroon (N = 1)<br>Eswatini (N = 1)<br>Ghana (N = 1)<br>Kenya (N = 3)<br>Lesotho (N = 1)<br>Nigeria (N = 4)<br>Tanzania (N = 1)<br>Zambia (N = 1) |
| Upper-Middle (N = 47) | China (N = 26)<br>Indonesia (N = 1)<br>Thailand (N = 1)                                       |                                                                                                                                                                                             | Brazil (N = 1)<br>Argentina (N = 1)<br>Costa Rica (N = 1)<br>Dominican Republic (N = 1)<br>Guatemala (N = 1)<br>Mexico (N = 2) |                                                  |                                            |                                                     | South Africa (N = 12)                                                                                                                              |
| High (N = 276)        | Australia (N = 54)<br>Japan (N = 3)<br>Korea (N = 2)<br>New Zealand (N = 5)<br>Taiwan (N = 2) | Croatia (N = 1)<br>France (N = 3)<br>Germany (N = 3)<br>Greece (N = 2)<br>Ireland (N = 2)<br>Norway (N = 4)<br>Poland (N = 1)<br>Spain (N = 3)<br>Sweden (N = 2)<br>United Kingdom (N = 13) | Chile (N = 1)                                                                                                                  | Israel (N = 2)<br>Saudi Arabia (N = 1)           | Canada (N = 22)<br>United States (N = 150) |                                                     |                                                                                                                                                    |

Notes: The total N in this table will not add up to the total N for the paper as some studies were conducted in multiple countries. Economic status was determined using the World Bank's classification system (see here for more details: <https://datahelpdesk.worldbank.org/knowledgebase/topics/19280-country-classificatio>)

<https://doi.org/10.1371/journal.pone.0305516.t003>

(n = 24), cross-sectional studies (n = 16), prospective cohort studies (n = 15), cohort studies (n = 14), retrospective cohort studies (n = 11), interrupted time series (n = 5) and Markov modelling (n = 2). Table 5 provides a content summary analysis for the 17 health topics that were assessed in 3 or more studies. Of note, several papers did not assess a specific health topic (e.g., they were studying an intervention applicable to any condition). Information on these studies can be found in S4 Appendix. We judged 7 topic areas to be ready for formal systematic review including CVD (n = 12), weight management (n = 9), pain management (n = 8), palliative care (n = 3), alcohol use (n = 3), stroke rehabilitation (n = 3), vaccination (n = 4), and sexually transmitted infections (n = 3). We judged 4 topic areas that would clearly benefit from an in-depth scoping review including diabetes (n = 48), mental health (n = 34), hypertension (n = 13) and cancer (n = 8). Additional research is required in four topic areas: HIV (n = 7), asthma (n = 6), chronic disease (n = 4), pregnancy (n = 3) and COPD (n = 3). Within each topic area there was a need for studies using controlled designs. The interventions and outcomes reported within each area were also highly variable. Additionally, we found very few studies in numerous areas including atrial fibrillation, burn rehab, chagas disease, childhood

**Table 4. Content summary for quality—Evidence-based medicine (health topics that were assessed by 3 or more studies are reported in the content summary).**

| Topic Study (n)                | Countries, Year Range                                                                 | Intervention                                                                                | Study Design                 | Adherence* measured? Y/N/ U & Type                                                 | Content Summary                                                                                                                                                                                                                                                                                                                                                                                                                                                                                                | Suggestions for future research                                                                                                                                                                                                                                                                                 |
|--------------------------------|---------------------------------------------------------------------------------------|---------------------------------------------------------------------------------------------|------------------------------|------------------------------------------------------------------------------------|----------------------------------------------------------------------------------------------------------------------------------------------------------------------------------------------------------------------------------------------------------------------------------------------------------------------------------------------------------------------------------------------------------------------------------------------------------------------------------------------------------------|-----------------------------------------------------------------------------------------------------------------------------------------------------------------------------------------------------------------------------------------------------------------------------------------------------------------|
| Diabetes (n = 21)<br>2000–2021 | US (8), China (5), Aus (3), Cameroon (1), CAN (1), NZ (1), Philippines (1), Spain (1) | Service Changes (10)<br>Provider training +/- other strategies (8)<br>Patient education (3) | RCT (7)<br>CS (3)<br>US (11) | Yes (6)<br>Unclear (15)<br>Varied                                                  | Twenty-one studies assessed interventions that aimed to improve adherence to some aspect of guideline-based care for diabetes. There was wide variation in or lack of reporting for the aspect of care that was trying to be improved. The interventions also varied but provider education was the most consistent. Service changes was also popular but there was wide variation in the types of changes used. 30% used a RCT design and a further 14% used a control group but over half were uncontrolled. | <b>In-depth scoping review</b><br>There are a number of provider training interventions that have been tested using an RCT. However, there is a degree of variation in the interventions tested in this category that would benefit from further investigation to form meaningful PICO for a systematic review. |
| Mental Health (n = 13)         | Aus (4), US (4), India (2), Canada (1), Mali (1), South Africa (1)                    | Provider training +/- other strategies (8)<br>Service Changes (5)                           | RCT (2)<br>CS (1)<br>US (10) | Yes (7)<br>Unclear (2)<br>Varied<br>Other-Provider knowledge/ attitudes/skills (6) | Thirteen studies assessed interventions that aimed to improve adherence to some aspect to guideline-based care for mental health. Just over half used provider training as the intervention. The remaining intervention types included some change in service structure but were assessed in less than 3 studies. For the provider training interventions 2 used an RCT design and 1 used a controlled before-after study and the remainder were uncontrolled studies.                                         | <b>In-depth scoping review</b><br>There are a number of provider training or service changes interventions evaluated, but most in uncontrolled studies using a range of different outcomes. A scoping review would be beneficial to form meaningful PICO for future studies or a systematic review.             |
| Cancer (n = 12)<br>1999–2017   | US (8), Egypt (1), Greece (1), NZ (1), UK (1)                                         | Service Changes (5)<br>Provider training +/- other strategies (4)<br>Patient education (3)  | RCT (5)<br>CS (1)<br>US (6)  | Yes (10)<br>Unclear (2)<br>Screening rates or referral (10)                        | Twelve studies assessed interventions that aimed to improve adherence to some aspect to guideline-based care for cancer. The main guideline was screening rates or referral to a screening procedure such as colonoscopy. Just over half used provider or patient education and the remainder used some change to service structure or mass screening or audit and feedback but were each assessed in less than 3 studies.                                                                                     | <b>Systematic review</b><br>Four provider training interventions, all in the US and all RCTs, show promise for a systematic review. However, aims and outcomes will need more assessment for a meta-analysis. Other interventions would be suited to a narrative synthesis.                                     |
| Asthma (n = 6)<br>2001–2017    | US (3), CAN (2), Aus (1)                                                              | Provider training +/- other strategies (4)<br>Patient education (2)                         | RCT (1)<br>CS (1)<br>US (4)  | Yes (4)<br>Unclear (2)<br>Varied                                                   | Six studies assessed interventions that aimed to improve adherence to some aspect to guideline-based care for asthma. 4 studies used provider education and 2 used patient education interventions. Multiple adherence outcomes were assessed, however, completion of Asthma action plans used in at least 3 studies. There was only one study that used a RCT design and one that used a control group the remainder were uncontrolled.                                                                       | <b>In-depth scoping review</b>                                                                                                                                                                                                                                                                                  |

*(Continued)*

Table 4. (Continued)

| Topic Study (n)                            | Countries, Year Range                                                          | Intervention                                                                               | Study Design                | Adherence* measured? Y/N/ U & Type                   | Content Summary                                                                                                                                                                                                                                                                 | Suggestions for future research                                                                            |
|--------------------------------------------|--------------------------------------------------------------------------------|--------------------------------------------------------------------------------------------|-----------------------------|------------------------------------------------------|---------------------------------------------------------------------------------------------------------------------------------------------------------------------------------------------------------------------------------------------------------------------------------|------------------------------------------------------------------------------------------------------------|
| CVD (n = 5)<br>2011–2019                   | China (2), Aus (1),<br>Indonesia (1), NZ (1)                                   | Service Changes (3)<br>Patient education (2)                                               | RCT (2)<br>CS (2)<br>US (1) | Yes (5)<br>Varied                                    | Five studies assessed interventions that aimed to improve adherence to some aspect to guideline-based care for CVD. Four studies had a control group, 2 of which were RCTs. No intervention type was assessed in 3 or more studies.                                             | <b>Systematic review</b><br>Due to heterogeneity of interventions, a narrative synthesis may be warranted. |
| Pregnancy related (n = 4)<br>2016–2018     | Burkina Faso (1),<br>Dominican Republic (1),<br>Ethiopia (1),<br>Guatemala (1) | Service changes (4)                                                                        | RCT (1)<br>US (3)           | Yes (3)<br>Unclear (1)<br>Varied                     | Four studies assessed interventions that aimed to improve adherence to some aspect to guideline-based care for pregnancy related topics. One study was an RCT and the rest were uncontrolled. No intervention type was assessed in 3 or more studies                            | <b>Additional research</b>                                                                                 |
| Respiratory infection (n = 4)<br>2017–2019 | China (3), US (1)                                                              | Provider training +/- other strategies (3)<br>Patient education (1)                        | RCT (3)<br>US (1)           | Yes (3)<br>Unclear (1)<br>Antibiotic prescribing (3) | Four studies assessed interventions that aimed to improve adherence to some aspect to guideline-based care for respiratory tract infections. three studies were RCTs and one was uncontrolled. Provider education with and without patient education was assessed in 3 studies. | <b>Systematic review</b>                                                                                   |
| Chronic Disease (n = 3)<br>2009–2017       | Aus (2), CAN (1)                                                               | Service Change (3)                                                                         | RCT (1)<br>US (2)           | Yes (3)<br>Varied                                    | Three studies assessed interventions that aimed to improve adherence to some aspect to guideline-based care for chronic disease. One study was an RCT and two were uncontrolled. No intervention type was assessed in 3 or more studies.                                        | <b>Additional research</b>                                                                                 |
| HIV (n = 3)<br>2016–2020                   | South Africa (3)                                                               | Provider training +/- other strategies (1)<br>Patient education (1)<br>Service Changes (1) | RCT (1)<br>US (2)           | Yes (3)<br>Varied                                    | Three studies assessed interventions that aimed to improve adherence to some aspect to guideline-based care for HIV. One study was an RCT and two were uncontrolled. No intervention type was assessed in 3 or more studies.                                                    | <b>Additional research</b>                                                                                 |

**Notes:**

**Guideline adherence:** This outcome would be a measure of provider adherence to the particular guideline, recommendation, medical directive or policy change that the intervention was trying to change. It may be reported as adherence to individual recommendation(s) or a composite score of multiple recommendations. The recommendations may not be the same across studies and this does not preclude meta-analysis depending on the question of interest.

**Study design:** RCTs include individual and cluster RCTs, CS include non-randomized studies with a control group (i.e. controlled before-after studies and interrupted time series, US includes all studies without a pre-assigned control group (uncontrolled before-after, cohort studies or cross sectional studies)

**Interventions:** Due to the many types of interventions that could not all be easily listed in this table, “service change” was used to capture any of the intervention codes which involved changing some aspect of the health system (extended scope of practice, telehealth/virtual care, co-ordination/referral pathways, reorganization of service or implementation of a new service).

**Data not included in this table:** Health topics that were assessed in 2 or less studies include: Antibiotic prescribing, Atrial fibrillation, Back pain, chronic lung disease, COPD, Dental care, epilepsy, Hypertension, malaria, maternal and child health, neonatal care, obstetrics, palliative care, PCOS, post abortion care, preventative care, sexually transmitted infections, skin infections, sleep, speech impairments, surgery, vaccinations, vision impairments. Topic areas without a specific health topic: Three health areas did not include a specific health topic and were not included for this content summary: general health without a clear health topic and medication related topics.

<https://doi.org/10.1371/journal.pone.0305516.t004>

Table 5. Content summary quality—Patient clinical outcomes (health topics that were assessed by 3 or more studies are reported in the content summary).

| Topic Study (n) Year Range       | Countries, Year Range                                                                                                                                          | Intervention                                                                                   | Study Designs                 | Outcome                                                                                    | Content Summary                                                                                                                                                                                                                                                                                                                                                                                                                                                                                                                                                                                                                                                                                          | Suggestions for future research                                                                                                                                                                                                                                                                                                                                                                         |
|----------------------------------|----------------------------------------------------------------------------------------------------------------------------------------------------------------|------------------------------------------------------------------------------------------------|-------------------------------|--------------------------------------------------------------------------------------------|----------------------------------------------------------------------------------------------------------------------------------------------------------------------------------------------------------------------------------------------------------------------------------------------------------------------------------------------------------------------------------------------------------------------------------------------------------------------------------------------------------------------------------------------------------------------------------------------------------------------------------------------------------------------------------------------------------|---------------------------------------------------------------------------------------------------------------------------------------------------------------------------------------------------------------------------------------------------------------------------------------------------------------------------------------------------------------------------------------------------------|
| Diabetes (n = 48) 2001–2022      | US (21), Aus (9), China (4), Can (3), Spain (2), Brazil (1), Cameroon (1), Costa Rica (1), Israel (1), NZ (1), Pakistan (1), Philippines (1), Saudi Arabia (1) | Service change (23)<br>Patient education +/- other strategies (21)<br>Provider training (4)    | RCT (13)<br>CS (6)<br>US (29) | HBA1C (30)                                                                                 | 48 studies assessed interventions that aimed to improve at least one patient clinical outcome associated with diabetes (e.g. HBA1c). Other common outcomes included fasting plasma glucose, weight, height, cholesterol and blood pressure. Patient education (with or without additional strategies) was the most frequently used intervention. Interventions related to service change in some way including extending scope of practice a non-physician to deliver a diabetes primary care service and lastly provider training (with or without another strategy) was also used. 27% of studies used a RCT design with a further 13% using a control group. The remainder were uncontrolled designs. | <b>In-depth scoping review.</b><br>This area shows promise for a <i>systematic review and potential meta-analysis</i> . However due to the wide variation in interventions and outcomes, an in-depth scoping review is recommended to clarify research question viability would likely be more beneficial at this time. Given the variation in context, a realist review approach may also be suitable. |
| Mental Health (n = 34) 2000–2022 | US (19), Aus (3), India (2), UK (2), Chile (1), Ethiopia (1), Ireland (1), Japan (1), Lesotho (1), Mali (1), Rwanda (1), South Africa (1)                      | Service change (22)<br>Patient education +/- other strategies (6)<br>Provider training (6)     | RCT (5)<br>CS (4)<br>US (25)  | Outcomes varied by condition and aim. Depression symptoms and quality of life were common. | 34 studies assessed interventions that aimed to improve at least one patient clinical outcome associated with mental health. 44% of the studies focused on depression +/- anxiety, 24% focused on a broader range of multiple mental health conditions and 3 or fewer studies focused on ADHD, autism or suicide risk. There was a wide variety of interventions used. Service changes were the most common with collaborative care or adding a new service delivered by a nurse or mental health worker being among the most common. 15% used an RCT design and a further 9% used a control group the remainder were uncontrolled studies.                                                              | <b>In-depth scoping review.</b><br>This area shows promise for a <i>systematic review and potential meta-analysis</i> . However due to the wide variation in population, interventions and outcomes, an in-depth scoping review is recommended to clarify exact PICO questions. Given the variation in context, a realist review approach may also be suitable.                                         |
| Hypertension (n = 13) 1997–2021  | US (7), China (2), Canada (1), Taiwan (1), Zambia (1), UK (1)                                                                                                  | Patient education +/- other strategies (6)<br>Provider training only (1)<br>Service change (6) | RCT (4)<br>CS (2)<br>US (7)   | Blood pressure (11)<br>Blood pressure control (1)<br>Stroke risk (1)                       | Thirteen studies assessed interventions that aimed to improve at least one patient clinical outcome associated with hypertension (e.g. blood pressure). Patient education was the most common type of intervention tested. 31% used an RCT design and a further 15% used a control group, the remainder were uncontrolled.                                                                                                                                                                                                                                                                                                                                                                               | <b>In-depth scoping review</b><br>While all studies assessed a common outcome of blood pressure, the multicomponent heterogeneous nature of most interventions may suggest an in-depth scoping review is warranted to confirm feasible research questions for a systematic review or realist review.                                                                                                    |

(Continued)

Table 5. (Continued)

| Topic Study (n) Year Range     | Countries, Year Range                                                                                 | Intervention                                                                                   | Study Designs               | Outcome                                       | Content Summary                                                                                                                                                                                                                                                                                                                                                                                                                                                                                                                                            | Suggestions for future research                                                                                                                                                                                                                                                                                                                |
|--------------------------------|-------------------------------------------------------------------------------------------------------|------------------------------------------------------------------------------------------------|-----------------------------|-----------------------------------------------|------------------------------------------------------------------------------------------------------------------------------------------------------------------------------------------------------------------------------------------------------------------------------------------------------------------------------------------------------------------------------------------------------------------------------------------------------------------------------------------------------------------------------------------------------------|------------------------------------------------------------------------------------------------------------------------------------------------------------------------------------------------------------------------------------------------------------------------------------------------------------------------------------------------|
| CVD (n = 12) 2000–2019         | US (2), UK (2), China (2), Aus (1), India (1), Indonesia (1), New Zealand (1), Poland (1), Sweden (1) | Patient education +/- other strategies (6)<br>Provider training only (1)<br>Service change (5) | RCT (2)<br>CS (4)<br>US (6) | CHO (5)<br>Blood pressure (8)<br>CVD risk (4) | Twelve studies assessed interventions that aimed to improve at least one patient clinical outcome associated with CVD (e.g. CHO, BP or CVD risk). Half of the studies used patient education and the remainder used different types of changes in service structure. 17% of the studies used a RCT design and a further 33% used a control group, the remainder were uncontrolled studies.                                                                                                                                                                 | <b>Systematic review (with realist review approach)</b><br>This area shows promise for a systematic review with a potential meta-analysis of patient education interventions and narrative synthesis of other service change interventions may be warranted. Additionally, a realist review approach may be used to explore impact of context. |
| Weight mgmt. (n = 9) 2008–2022 | US (8), Aus (1)                                                                                       | Patient education +/- other strategies (7)<br>Service change (2)                               | RCT (6)<br>US (2)           | weight change (6)<br>BMI (3)<br>Unclear (2)   | Nine studies assessed interventions that aimed to improve at least one patient clinical outcome associated with weight management (e.g. change in weight and BMI). The most common intervention type followed distantly some type of change in service structure. 67% of the studies used a RCT design and the remaining studies were uncontrolled.                                                                                                                                                                                                        | <b>Systematic review.</b><br>This area shows promise for a systematic review and a potential meta-analysis for patient education interventions for weight loss.                                                                                                                                                                                |
| Cancer (n = 8) 1998–2017       | US (3), Aus (3), Nepal (1), Sweden (1)                                                                | Service change (5)<br>patient or provider education (2),<br>audit and feedback (1)             | RCT (4)<br>US (4)           | Varied                                        | Eight studies assessed interventions that aimed to improve at least one patient clinical outcome associated with cancer. However, within this category, there were five different cancer types being studied (breast, cervical, colorectal, skin and multiple types) and the outcomes were also quite varied from cancer awareness to screening to patient satisfaction and quality of life. Interventions also varied with no single intervention type used in more than 2 studies. 50% of studies used a RCT design and the remainder were uncontrolled. | <b>In-depth scoping review.</b><br>While this area did have high quality study designs, the heterogeneity in cancer types, interventions and outcomes make it hard to recommend any specific question for a systematic review. This area may benefit from a more in-depth scoping review to confirm questions for a systematic review.         |

(Continued)

Table 5. (Continued)

| Topic Study (n) Year Range        | Countries, Year Range                                                         | Intervention                                                         | Study Designs               | Outcome                                                            | Content Summary                                                                                                                                                                                                                                                                                                                                                                                                                                                     | Suggestions for future research                                                                                                                                                                                                                                                                                         |
|-----------------------------------|-------------------------------------------------------------------------------|----------------------------------------------------------------------|-----------------------------|--------------------------------------------------------------------|---------------------------------------------------------------------------------------------------------------------------------------------------------------------------------------------------------------------------------------------------------------------------------------------------------------------------------------------------------------------------------------------------------------------------------------------------------------------|-------------------------------------------------------------------------------------------------------------------------------------------------------------------------------------------------------------------------------------------------------------------------------------------------------------------------|
| Pain Mgmt (n = 8) 2001–2020       | US (5), Canada (2), UK (1)                                                    | Patient education (5)<br>Services change (3)                         | RCT (2)<br>CS (3)<br>US (3) | Pain intensity (2)<br>Disability (4)<br>Medication (2)             | Eight studies assessed interventions that aimed to improve at least one patient clinical outcome associated with pain mgmt. (pain intensity or disability or changes in medication). Patient education was the most common intervention type and the remainder used different types of changes to service structure. 25% used a RCT design and a further 38% had a control group with the remainder of studies uncontrolled.                                        | <b>Systematic Review</b><br>A formal systematic review and potential meta-analysis may be warranted for patient education interventions.                                                                                                                                                                                |
| HIV (n = 7) 2006–2020             | South Africa (2), China (1), Ethiopia (1), Nigeria (1), Swaziland (1), US (1) | Service changes (7)                                                  | RCT (2)<br>US (5)           | CD4 counts (2)<br>Viral load (1) or suppression (1)<br>Unclear (3) | Seven studies assessed interventions that aimed to improve at least one patient clinical outcome associated with HIV, however, the outcomes were varied, with CD4 counts, viral load or suppression being the common clinical outcomes. Interventions also varied with most involving some change to service structure, however, no single intervention type was used in more than 2 studies. 29% of studies used a RCT design and the remainder were uncontrolled. | <b>Additional research</b><br>More high quality studies HIV outcomes for patients is likely warranted, however, this may not be feasible and thus an in-depth scoping review with a content expert may also be warranted to help guide future research questions and where higher quality studies may be needed or not. |
| Asthma (n = 6) 2001–2017          | US (3), Aus (2), Canada (1)                                                   | Provider training (3)<br>Patient education (2)<br>Service change (1) | CS (1)<br>US (5)            | Asthma control (3)<br>FEV1% (3)                                    | Six studies assessed interventions that aimed to improve at least one patient clinical outcome associated related to asthma (.). 50% used provider education, 33% used patient education and 17% used some type of service structure change. No studies used a RCT design, 1 study used a control group with the remainder of studies uncontrolled.                                                                                                                 | <b>Additional research</b><br>Higher quality studies are likely needed but are also likely impractical. Thus, a formal scoping review or systematic review with narrative synthesis may be warranted instead.                                                                                                           |
| Chronic Disease (n = 4) 2009–2018 | Canada (2), China (1), India (1)                                              | Service change (3)<br>Patient education (1)                          | RCT (2)<br>CS (1)<br>US (1) | Varied. QoL & Disease risk were common                             | 4 studies assessed interventions that aimed to improve an aspect of care related to chronic disease. Different combinations of multiple chronic conditions and interventions were seen across studies. 50% of studies used a RCT design, 1 study used a control group and 1 was uncontrolled.                                                                                                                                                                       | <b>Additional research</b>                                                                                                                                                                                                                                                                                              |

(Continued)

Table 5. (Continued)

| Topic Study (n) Year Range          | Countries, Year Range                           | Intervention                                                     | Study Designs     | Outcome              | Content Summary                                                                                                                                                                                                                                                                                                                                          | Suggestions for future research                                                                                                                                                                                                                    |
|-------------------------------------|-------------------------------------------------|------------------------------------------------------------------|-------------------|----------------------|----------------------------------------------------------------------------------------------------------------------------------------------------------------------------------------------------------------------------------------------------------------------------------------------------------------------------------------------------------|----------------------------------------------------------------------------------------------------------------------------------------------------------------------------------------------------------------------------------------------------|
| Vaccination (n = 4) 2001–2016       | US (2), China (1), UK (1)                       | Patient education +/- other strategies (2)<br>Service change (2) | RCT (2)<br>US (2) | Vaccination rate (4) | Four studies assessed interventions that aimed to improve at least one patient clinical outcome related to vaccinations (e.g. vaccination rates). Studies were a mixture of patient education and service changes. 50% used a RCT design and two were uncontrolled.                                                                                      | <b>Systematic review</b><br>A systematic review and meta-analysis may be possible for the RCTs alongside a narrative synthesis of lower quality study designs.                                                                                     |
| Alcohol use (n = 3) 2007–2010       | Aus (1), US (1), Thailand (1)                   | Patient education (3)                                            | RCT (3)           | Drinks per day (3)   | Three studies assessed interventions that aimed to improve at least one patient clinical outcome associated with alcohol use (drinks per day). All used patient education as the interventions and all used a RCT design.                                                                                                                                | <b>Systematic review</b><br>Systematic review with potential meta-analysis. A realist approach may be warranted given the different contexts in which the interventions were tested.                                                               |
| COPD (n = 3) 2009–2019              | China (1), Greece (1), US (1)                   | Provider training (2)<br>Patient education (1)                   | RCT (1)<br>US (2) | Unclear              | Three studies assessed interventions that aimed to improve at least one patient clinical outcome associated with COPD. A range of outcomes were assessed related to diet, exercise, air flow obstruction and COPD general questionnaires but there was little similarity across studies. Only one used a RCT design and the remainder were uncontrolled. | <b>Additional research</b><br>Higher quality studies seem feasible for this type of health condition and thus, it is likely that the evidence base would benefit from investment in higher quality studies to improve outcomes for this condition. |
| Palliative Care (n = 3) 2016–2018   | Aus (2), US (1)                                 | Service change (3)                                               | US (3)            | Unclear              | Three studies assessed interventions that aimed to improve at least one patient clinical outcome associated with palliative care but no study assessed the same outcomes. Different types of service changes were used in each study and all studies were uncontrolled.                                                                                  | <b>Systematic review (narrative synthesis)</b>                                                                                                                                                                                                     |
| Pregnancy related (n = 3) 2018–2019 | Ethiopia (1), Dominican Republic (1), Kenya (1) | Service change (3)                                               | US (3)            | Unclear              | Three studies assessed interventions that aimed to improve at least one patient clinical outcome associated with pregnancy. All were conducted in low income countries and were uncontrolled studies. all interventions appear to use a change to service structure but in different ways.                                                               | <b>Additional research</b><br>Higher quality studies are likely needed but are also likely impractical. Thus, a formal scoping review or systematic review with narrative synthesis may be warranted instead.                                      |

(Continued)



Table 5. (Continued)

| Topic Study (n) Year Range                        | Countries, Year Range            | Intervention       | Study Designs | Outcome                                  | Content Summary                                                                                                                                                                                                                                                                                                                  | Suggestions for future research                                                                                                                                                                                                             |
|---------------------------------------------------|----------------------------------|--------------------|---------------|------------------------------------------|----------------------------------------------------------------------------------------------------------------------------------------------------------------------------------------------------------------------------------------------------------------------------------------------------------------------------------|---------------------------------------------------------------------------------------------------------------------------------------------------------------------------------------------------------------------------------------------|
| Sexually transmitted infections (n = 3) 2018–2019 | Aus (3)                          | Service change (3) | RCT (3)       | Prevalence (2)<br>Unclear (1)            | Three studies assessed interventions that aimed to improve at least one patient clinical outcome associated with sexually transmitted infections (either prevalence or diagnostic test accuracy). All were conducted in Australia and all used a RCT design.                                                                     | <b>Systematic review</b><br>The interventions may not be similar enough for meta-analysis. A narrative synthesis may be warranted.                                                                                                          |
| Stroke Rehab (n = 3) 2004–2021                    | China (1), India (1), Norway (1) | Service change (3) | RCT (3)       | Function (2)<br>Secondary Prevention (1) | Three studies assessed interventions that aimed to improve at least one patient clinical outcome associated with stroke rehab (function and prevention of second stroke). All used a type of service change most including some type of home rehab plus other types of strategies as the intervention and all used a RCT design. | <b>Systematic review</b><br>The interventions may not be similar enough for meta-analysis. A narrative synthesis may be warranted. A realist approach may be warranted given the different contexts in which the interventions were tested. |

**Notes:**

**Study design:** RCTs include individual and cluster RCTs, CS include non-randomized studies with a control group (i.e. controlled before-after studies and interrupted time series, US includes all studies without a pre-assigned control group (uncontrolled before-after, cohort studies or cross sectional studies)

**Interventions:** Due to the many types of interventions that could not all be easily listed in this table, “service change” was used to capture any of the intervention codes which involved changing some aspect of the health system (extended scope of practice, telehealth/virtual care, co-ordination/referral pathways, reorganization of service or implementation of a new service)

**Data not included in this table:** Health topics that were assessed in 2 or less studies include: Atrial fibrillation, burn rehab, Chagas disease, childhood diarrhea, dementia, epilepsy, kidney disease, lung Disease, osteoarthritis, osteoporosis, smoking cessation, speech impairments, vision impairments. Topic areas without a specific health topic: Two health areas did not include a specific topic and were not included for this content summary: general health and medication related topics

<https://doi.org/10.1371/journal.pone.0305516.t005>

diarrhea, dementia, epilepsy, kidney disease, lung disease, osteoarthritis, osteoporosis, smoking cessation, speech impairments, vision impairments.

**Patient experience (n = 34).** Most of the 34 articles aiming to improve quality of care by enhancing patient experience were published between 2010–2022. The majority of the studies were published in the United States (n = 19). The most commonly used interventions involved reorganizing existing services to optimize care (n = 6) or expanding the scope of practice of non-family physician healthcare providers (n = 5). Some of the interventions were used in combination as well (e.g., provider education/training + audit and feedback). The most common health topics included mental health (n = 6) and pregnancy (n = 3). Additionally, patient experience related to care for minor illness, burn rehab, cancer, chronic disease, diabetes, hypertension, and pain was studied by 2 or less studies. Most studies used uncontrolled before-after designs (n = 9), randomized controlled trials (n = 8), or cross-sectional designs (n = 7). Patient experience was typically measured via questionnaires, interviews, and surveys. Table 6 provides a content summary analysis for the two health topics that were assessed in three or more studies. Among these, we judged mental health (n = 6) to be ready for systematic review. Additional research is required for pregnancy (n = 3) as all three identified studies

**Table 6. Content summary for quality—Patient experience (health topics that were assessed by 3 or more studies are reported in the content summary).**

| Topic Study (n)                    | Countries, Year Range                       | Intervention                                                          | Study Design      | Experience outcome measured? Yes/No/Unclear* Type                      | Content Summary                                                                                                                                                                                                                                                                                                                                                      | Suggestions for future research                                                                                                                                                                                                                                                                                                                    |
|------------------------------------|---------------------------------------------|-----------------------------------------------------------------------|-------------------|------------------------------------------------------------------------|----------------------------------------------------------------------------------------------------------------------------------------------------------------------------------------------------------------------------------------------------------------------------------------------------------------------------------------------------------------------|----------------------------------------------------------------------------------------------------------------------------------------------------------------------------------------------------------------------------------------------------------------------------------------------------------------------------------------------------|
| Mental Health (n = 6)<br>2007–2018 | US (4)<br>Chile (1)<br>UK (1)               | Service Changes (3)<br>Patient education (2)<br>Provider training (1) | RCT (1)<br>US (5) | Yes (6) satisfaction                                                   | Seven studies assessed outcomes related to patient experience (i.e. satisfaction with care/service) mostly in the US. The interventions varied but a majority used some form of a collaborative care model and the remainder implemented a form of psychological education such as CBT. Only one study used a randomized design and the remainder were uncontrolled. | <b>Systematic review</b><br>There appears to be sufficient data assessing patient satisfaction with service changes that involve some form of collaborative care that would warrant a systematic review.                                                                                                                                           |
| Pregnancy (n = 3)<br>2010–2018     | Australia (1)<br>Canada (1)<br>Ethiopia (1) | Service Changes (3)                                                   | US (3)            | Yes (3)<br>Satisfaction (1)<br>Needs met (1)<br>Overall experience (1) | Three studies assessed outcomes related to patient experience in three different countries. The interventions were all different but were about implementing a new model of care for pregnant women. All studies assessed different types of experience measures all were uncontrolled studies.                                                                      | <b>More research</b><br>Each of the three studies assessed a different aspect of patient experience with three different types of new care models in three different countries. This could be included as part of a larger scoping review on the health topic of pregnancy related issues but would be sufficient to warrant its own review topic. |

**Notes:**

**Unclear outcomes\*:** this means that the study suggested it measured the outcome but it wasn't clear from the methods or results how this was actually assessed and follow-up with study authors would be required to confirm if this outcome was assessed.

**Study design:** RCTs include individual and cluster RCTs, CS include non-randomized studies with a control group (i.e. controlled before-after studies and interrupted time series, US includes all studies without a pre-assigned control group (uncontrolled before-after, cohort studies or cross sectional studies)

**Interventions:** Due to the many types of interventions that could not all be easily listed in this table, "service change" was used to capture any of the intervention codes which involved changing some aspect of the health system (extended scope of practice, telehealth/virtual care, co-ordination/referral pathways, reorganization of service or implementation of a new service)

**Data not included in this table:**

*Health topics that were assessed in 2 or less studies include:*

Antibiotic prescribing, burn rehabilitation, cancer, chronic disease, diabetes, hypertension, pain management, palliative care, stroke rehabilitation, weight management.

*Topic areas without a specific health topic:*

Any condition, medication related, minor illness.

<https://doi.org/10.1371/journal.pone.0305516.t006>

were assessing different interventions and different outcomes. Additional research is recommended for this outcome category as a whole since there were so few studies examining this outcome.

**Equity of care (n = 4).** Four studies examining equity of care were published between 2010–2022 including one study each from Ethiopia, India, Kenya, and the United States. The interventions from these studies involved reorganization of services (n = 2), provider training (n = 1), and a combination of provider training and lay community member training (n = 1). Three studies focused on mental health and one on pregnancy. [Table 7](#) provides a content summary analysis for the health topic that was assessed in three or more studies. Of note, several papers did not assess a specific health topic (e.g., they were studying an intervention applicable to any condition). We judged the topic of mental health (n = 3) to require additional research; two studies assessed similar outcomes but there was not enough similarity among interventions to warrant a review. Additional research is recommended for this outcome category as a whole since there were so few studies examining this outcome.

**Patient safety (n = 1).** Only one study conducted in 2019 from the United States examined patient safety. The intervention involved coordinating care to improve medication

Table 7. Content summary for quality—Equity (health topics that were assessed by 3 or more studies are reported in the content summary).

| Topic Study (n)                    | Countries, Year Range               | Intervention                                                          | Study Design | Experience outcome measured? Yes/No/Unclear* Type        | Content Summary                                                                                                                                                                                                                                                                                                                                                                                                                                                      | Suggestions for future research                                                                                                                         |
|------------------------------------|-------------------------------------|-----------------------------------------------------------------------|--------------|----------------------------------------------------------|----------------------------------------------------------------------------------------------------------------------------------------------------------------------------------------------------------------------------------------------------------------------------------------------------------------------------------------------------------------------------------------------------------------------------------------------------------------------|---------------------------------------------------------------------------------------------------------------------------------------------------------|
| Mental Health (n = 3)<br>2019–2020 | US (1)<br>Ethiopia (1)<br>Kenya (1) | Service Changes (3)<br>Patient education (2)<br>Provider training (1) | US (3)       | Yes (3)<br>Discrimination (2)<br>Universal screening (1) | Three studies assessed outcomes related to equity of care. All studies were conducted in different countries. Two studies assessed stigma and experience of discrimination and one study assessed provision of depression screening for all appropriate patients. Two studies used interdisciplinary team-based care to deliver mental health services and one study used provider training on mental health knowledge and awareness. All studies were uncontrolled. | <b>More research</b><br>While two studies assessed discrimination there was not enough similarity amongst interventions to warrant a systematic review. |

**Notes:**

**Unclear outcomes\*:** this means that the study suggested it measured the outcome but it wasn't clear from the methods or results how this was actually assessed and follow-up with study authors would be required to confirm if this outcome was assessed.

**Study design:** RCTs include individual and cluster RCTs, CS include non-randomized studies with a control group (i.e. controlled before-after studies and interrupted time series, US includes all studies without a pre-assigned control group (uncontrolled before-after, cohort studies or cross sectional studies)

**Interventions:** Due to the many types of interventions that could not all be easily listed in this table, "service change" was used to capture any of the intervention codes which involved changing some aspect of the health system (extended scope of practice, telehealth/virtual care, co-ordination/referral pathways, reorganization of service or implementation of a new service)

**Data not included in this table:**

Health topics that were assessed in 2 or less studies include:

Pregnancy-related.

<https://doi.org/10.1371/journal.pone.0305516.t007>

reconciliation in a primary care clinic. Additional research is recommended for this outcome category as a whole since there were so few studies examining this outcome.

### Access to care

Seventy-six (20%) articles focused on interventions to improve access to primary care. Among these articles, 21 (28%) focused on recruitment of family physicians, 15 (20%) on retention of family physicians, 14 (18%) on recruitment of alternative health provider to provide family physician-related services, and 35 (46%) on access to other services not typically provided in primary care. Several of these studies assessed more than one outcome. A detailed breakdown of all intervention types, study designs, individual study outcomes, and outcome measurements, for access to care studies can be found in S8–S11 Appendices. This data is summarized in the following sections.

**Access to a primary care provider (n = 42).** Forty-two articles focused on improving access to primary care providers. The articles were largely published between 2010–2021 and came from 13 different countries, with the majority originating from the United States (n = 19) and Australia (n = 7). The most common study designs were cohort studies (n = 19), uncontrolled before-after studies (n = 10) and controlled before-after studies (n = 7). We found three main provider access topics, all of which were assessed in 3 or more studies, including recruitment (n = 21) and/or retention (n = 15) of family physicians, and recruitment of alternative primary care providers (e.g., nurse practitioners, pharmacists) (n = 14). Across the topics, different types of interventions were used, the most common type of intervention involved extending the scope of practice of non-GPs (n = 13), and the most common types of intervention for recruiting and retaining family physicians were implemented during medical

education via selective recruitment of students with a focus on rural practice into medical education ( $n = 10$ ), or medical education interventions that involved exposure to rural practice ( $n = 9$ ), followed by financial incentives to assist with tuition payback ( $n = 6$ ). A content summary for each of the three topic areas can be found in [Table 8](#). We judged all three topics to be ready for systematic review.

**Access to services ( $n = 36$ ).** The majority (77%) of the 36 studies that aimed to increase access to primary care services conducted between 2010–2022. These were conducted in the United States ( $n = 12$ ), Australia ( $n = 3$ ), Canada ( $n = 2$ ), India ( $n = 2$ ), and multiple other countries. The most commonly used interventions involved providing training to existing health professionals to deliver different types of additional services they would not normally deliver ( $n = 13$ ) or training lay community members ( $n = 4$ ). Other studies also commonly aimed to increase referral to existing services by improving awareness of services or ease of referral ( $n = 6$ ). Most common study designs were uncontrolled before-after ( $n = 13$ ), cohort designs ( $n = 8$ ), cross-sectional ( $n = 6$ ), interrupted time series ( $n = 4$ ), and randomized controlled trials ( $n = 3$ ). We identified three service area topics that were assessed in three or more studies including diabetes ( $n = 5$ ), mental health ( $n = 4$ ) and pregnancy ( $n = 4$ ). A content summary for each health topics can be found in [Table 9](#). Of note, several papers did not assess a specific health topic (e.g., they were studying an intervention applicable to any condition). For each of these topic areas, there was a wide range of interventions and outcome measurement methods. We judged all topics to be amenable to an in-depth scoping review.

### Efficiency of care delivery

Only 47 studies (15% of the total) examined efficiency of care. Among these, 28 (60%) included interventions aimed at improving cost-savings, 26 (55%) included interventions to improve healthcare use, and three included an intervention aimed at improving patient wait times. A detailed breakdown of all intervention types, study designs, individual study outcomes, and outcome measurements for efficiency studies can be found in [Table 4](#). This data is summarized in the following paragraphs.

**Wait times ( $n = 3$ ).** Three studies conducted in 2008, 2017, and 2020 in the United States ( $n = 2$ ) and Canada ( $n = 1$ ) assessed wait times. The interventions involved improving coordination/referral pathways, reorganization of services, and provider training. Two studies used an uncontrolled before-after study design and one used a prospective cohort design. Two studies focused on mental health and one on surgery. Wait times for new appointments were measured using data from a computerized monitoring system and electronic medical record data. Additional research is recommended for this outcome category as a whole as there were so few studies examining this outcome.

**Healthcare utilization ( $n = 26$ ).** Over 80% of the 26 articles assessing healthcare utilization were published between 2010–2022. Most of these studies were conducted in the United States ( $n = 12$ ), Canada ( $n = 4$ ), Australia ( $n = 3$ ), and South Africa ( $n = 2$ ). The most common intervention included reorganization of services to optimize care delivery ( $n = 7$ ) and improving coordination/referral pathways ( $n = 5$ ). Some studies used a combination of interventions (e.g., expanding scope of practice + provider training/upskilling). The majority of the studies used a controlled before-after ( $n = 8$ ), an uncontrolled before-after ( $n = 7$ ), or cohort ( $n = 5$ ) design. The most common health topics assessed were mental health ( $n = 2$ ) and palliative care ( $n = 2$ ). Additional research is recommended for this outcome category as a whole since it was not assessed in relation to the same health topic for three or more studies.

**Costing and cost-effectiveness ( $n = 28$ ).** Most of the 28 studies examining cost-savings as a means to improve efficiency were published between 2010–2022. These were conducted in a

**Table 8. Content summary for access—To a primary care provider (access topics that were assessed by 3 or more studies are reported in the content summary).**

| Access topic<br>Study (n)                                    | Countries, Year Range                                                                                 | Intervention                                                                                                                    | Study Designs                | Outcome                                                                                                       | Content Summary                                                                                                                                                                                                                                                                                                                                                                                                                                                                                                                                                                                                                                                                                                                                                                                                                                                                                        | Suggestions for future research                                                                                                                                                                                                                                                                                                                                                                                                                                                                                                                                                                                                                          |
|--------------------------------------------------------------|-------------------------------------------------------------------------------------------------------|---------------------------------------------------------------------------------------------------------------------------------|------------------------------|---------------------------------------------------------------------------------------------------------------|--------------------------------------------------------------------------------------------------------------------------------------------------------------------------------------------------------------------------------------------------------------------------------------------------------------------------------------------------------------------------------------------------------------------------------------------------------------------------------------------------------------------------------------------------------------------------------------------------------------------------------------------------------------------------------------------------------------------------------------------------------------------------------------------------------------------------------------------------------------------------------------------------------|----------------------------------------------------------------------------------------------------------------------------------------------------------------------------------------------------------------------------------------------------------------------------------------------------------------------------------------------------------------------------------------------------------------------------------------------------------------------------------------------------------------------------------------------------------------------------------------------------------------------------------------------------------|
| Recruitment of FPs (n = 21)                                  | US (13), Aus (2), France (2), Norway (2), CAN (1), Germany (1)<br>2001–2021                           | Medical education—exposure (8)<br>Medical Education—selective recruitment (8)<br>Financial incentives (4)<br>Service change (1) | CS (3)<br>US (18)            | # graduates practicing in a rural/remote community upon graduation                                            | Twenty-one studies tested interventions to increase recruit family physicians in rural or remote communities. There were 4 different types of interventions, the most common were changes made during the medical school training process either by exposure to rural areas during training or only recruiting applicants who lived or grew up in a rural or remote location and had a firm commitment to practicing in that area after training. Another 4 studies used some form of financial incentive mostly via medical school fee payment. Lastly, one study used a service change by implementing multidisciplinary family care teams to support collaboration and better working conditions to try and entice recruitment to rural or remote locations. Most studies were uncontrolled.                                                                                                        | <b>Systematic review (realist approach)</b><br>A systematic review of these three different strategies to increase access to primary care providers in rural areas. There have been reviews of this topic, however most have focused on family physicians and none provided a comprehensive review of the effectiveness of these different strategies with an understanding of implications for decision makers. Additionally, while RCTs or controlled trials may be hard to design for this topic area, a formal systematic review can provide thorough assessments of study quality and specific directions for future research to advance this area. |
| Retention of FPs (n = 15)                                    | US (6), Aus (3), Norway (1), Japan (2), Can (1), France (1)<br>2001–2020                              | Medical education—exposure (5)<br>Medical Education—selective recruitment (4)<br>Financial incentives (4)<br>Well-being (2)     | CS (4)<br>US (11)            | working in rural area up to 16 years post-grad (11)<br>GP density (1)<br>Intention to continue rural work (3) | Fifteen studies tested interventions to increase retention of family physicians in rural or remote communities. There were 4 different types of interventions, many similar to those issued for recruitment: the most common was exposure to rural areas during medical training which varied in duration and setting. Selective recruitment into medication school based on if the applicant lived or grew up in a rural or remote location and had a firm commitment to working in that area was used in 4 studies. Another 4 studies used some form of financial incentive mostly via medical school fee payment. Lastly, two studies used a well-being support program to try and increase retention in rural or remote locations. Both interventions offered social and emotional support but were based on different principals and delivered in different ways. Most studies were uncontrolled. |                                                                                                                                                                                                                                                                                                                                                                                                                                                                                                                                                                                                                                                          |
| Adding different types of PC providers (n = 14)<br>2000–2019 | US (4), UK (3), Aus (2), Croatia (1), Dominican Republic (1), India (1), South Africa (1), Taiwan (1) | Extended scope of practice (13)<br>Training of lay community members (1)                                                        | RCT (2)<br>CS (1)<br>US (11) | Coverage or reach via patient use (5)<br>Exact measure unclear (9)                                            | 14 studies tested interventions to increase access to an alternative primary care provider. The interventions included extending the scope of practice of health professionals including Nurses (6), Pharmacists (3), mental health workers (1), residents (1), and community or lay village health workers (2). The extended scope of practice related to a variety of health topics (e.g. mental health (3), medications (2), minor illness (2), diabetes (1)). Two studies used an RCT design and a further study used a control group and the remainder were uncontrolled.                                                                                                                                                                                                                                                                                                                         |                                                                                                                                                                                                                                                                                                                                                                                                                                                                                                                                                                                                                                                          |

**Notes:**

**Study design:** RCTs include individual and cluster RCTs, CS include non-randomized studies with a control group (i.e. controlled before-after studies and interrupted time series, US includes all studies without a pre-assigned control group (uncontrolled before-after, cohort studies or cross-sectional studies)

**Interventions:** Due to the many types of interventions that could not all be easily listed in this table, “service change” was used to capture any of the intervention codes which involved changing some aspect of the health system (extended scope of practice, telehealth/virtual care, co-ordination/referral pathways, reorganization of service or implementation of a new service)

<https://doi.org/10.1371/journal.pone.0305516.t008>

**Table 9. Content summary access—To a primary care services (access topics that were assessed by 3 or more studies are reported in the content summary).**

| Access topic Study (n)    | Countries, Year Range                                                    | Intervention                          | Study Designs    | Outcomes related to coverage via referral volume, patient use/ attendance | Content Summary                                                                                                                                                                                                                                                                                                                                                                                                                                                                                    | Suggestions for future research                                                                                                                                                                                                                                         |
|---------------------------|--------------------------------------------------------------------------|---------------------------------------|------------------|---------------------------------------------------------------------------|----------------------------------------------------------------------------------------------------------------------------------------------------------------------------------------------------------------------------------------------------------------------------------------------------------------------------------------------------------------------------------------------------------------------------------------------------------------------------------------------------|-------------------------------------------------------------------------------------------------------------------------------------------------------------------------------------------------------------------------------------------------------------------------|
| Diabetes (n = 5)          | US (4), Spain (1) 2009–2020                                              | Different types of Service change (5) | CS (2)<br>US (3) | Yes (2)<br>Unclear (3)                                                    | Five studies tested interventions to increase access to primary care by offering extra services related to Diabetes management and screening for complications. Interventions were quite varied in nature, some related to extra education clinics or home visits, some were implementing a new service for retinopathy or neuropathy screening and one used clinic-based quality improvement to offer additional services where needed. Two studies used a control group but 3 were uncontrolled. | <b>Scoping review</b><br>For each of these topic areas, there was a wide range of interventions and outcome measurement methods. An in-depth scoping review that focuses on how extra services are used to increase access to primary care in rural areas is warranted. |
| Mental Health (n = 4)     | US (3), India (1) 2008–2022                                              | Different types of Service change (4) | CS (1)<br>US (3) | Yes (3)<br>Unclear (1)                                                    | Four studies tested interventions to increase access to primary care by offering extra services for mental health (e.g.). Interventions included coordination efforts such as collaborative care and task sharing or education clinics. Most studies were uncontrolled.                                                                                                                                                                                                                            |                                                                                                                                                                                                                                                                         |
| Pregnancy related (n = 4) | Burkina Faso (1), Dominican Republic (1), Ghana (1), Kenya (1) 2016–2019 | Different types of Service change (4) | US (4)           | Yes (2)<br>Unclear (2)                                                    | Four studies tested interventions to increase access to primary care by offering extra services related to pregnancy. The interventions included implementing a new service and in some cases extending the scope of practice of existing health professionals or lay community members to offer the extra services. all studies were uncontrolled                                                                                                                                                 |                                                                                                                                                                                                                                                                         |

## Notes:

**Study design:** RCTs include individual and cluster RCTs, CS include non-randomized studies with a control group (i.e. controlled before-after studies and interrupted time series, US includes all studies without a pre-assigned control group (uncontrolled before-after, cohort studies or cross-sectional studies)

**Interventions:** Due to the many types of interventions that could not all be easily listed in this table, “service change” was used to capture any of the intervention codes which involved changing some aspect of the health system (extended scope of practice, telehealth/virtual care, co-ordination/referral pathways, reorganization of service or implementation of a new service)

**Data not included in this table:**

Health topics that were assessed in 2 or less studies include: cancer, chronic disease, CVD, febrile illness, HIV, Malaria, maternal and child health, NCD, speech impairments.

Topic areas without a specific health topic: three areas did not include a specific health topic: general health, medication related, and preventative care.

<https://doi.org/10.1371/journal.pone.0305516.t009>

variety of countries, most commonly in the United States (n = 12). The majority of the interventions focused on reorganizing services to optimize care delivery (n = 8), improving coordination/referral pathways (n = 6), and upskilling healthcare providers on evidence-based clinical practice guidelines (n = 4). The most common study design in this area was the uncontrolled before-after design (n = 10). Mental health (n = 3), preventative care (n = 2), CVD (n = 2), and epilepsy (n = 2) were the most commonly assessed health topics. A content summary for mental health can be found in Table 10. Of note, several papers did not assess a

**Table 10. Content summary efficiency—Costing and cost-effectiveness (efficiency topics that were assessed by 3 or more studies are reported in the content summary).**

| Topic Study (n)                    | Countries, Year Range | Intervention                                 | Study Design      | Efficiency outcome measured? Yes/No/Unclear* | Content Summary                                                                                                                                                                                                                                                                               | Suggestions for future research                                                                                                                                                                                   |
|------------------------------------|-----------------------|----------------------------------------------|-------------------|----------------------------------------------|-----------------------------------------------------------------------------------------------------------------------------------------------------------------------------------------------------------------------------------------------------------------------------------------------|-------------------------------------------------------------------------------------------------------------------------------------------------------------------------------------------------------------------|
|                                    |                       |                                              |                   | <b>Cost</b>                                  |                                                                                                                                                                                                                                                                                               |                                                                                                                                                                                                                   |
| Mental Health (n = 3)<br>2015–2017 | US (3)                | Provider training (2)<br>Service Changes (1) | RCT (1)<br>US (2) | Yes (3)                                      | Three studies assessed cost-related outcomes of implementing a new or change in service for improving mental health outcomes (e.g. adherence to guidelines, depression, quality of life). Costing outcomes varied across studies with only one study measuring cost-effectiveness with QALYs. | In-depth scoping review. While three studies assessed cost outcomes related to the topic area of mental health, the interventions and outcomes were different across studies precluding a specific PICO question. |

**Notes:**

**Unclear outcomes\*:** this means that the study suggested it measured the outcome, but it wasn't clear from the methods or results how this was actually assessed and follow-up with study authors would be required to confirm if this outcome was assessed.

**Study design:** RCTs include individual and cluster RCTs, CS include non-randomized studies with a control group (i.e. controlled before-after studies and interrupted time series, US includes all studies without a pre-assigned control group (uncontrolled before-after, cohort studies or cross-sectional studies)

**Interventions:** Due to the many types of interventions that could not all be easily listed in this table, “service change” was used to capture any of the intervention codes which involved changing some aspect of the health system (extended scope of practice, telehealth/virtual care, co-ordination/referral pathways, reorganization of service or implementation of a new service)

**Data not included in this table:**

*Health topics that were assessed in 2 or less studies include:*

Atrial fibrillation, cancer, chronic, CVD, diabetes, epilepsy, febrile illness, osteoporosis, palliative care, respiratory tract infection, osteoarthritis, dental care.

*Topic areas without a specific health topic:*

<https://doi.org/10.1371/journal.pone.0305516.t010>

specific health topic (e.g., they were studying an intervention applicable to any condition). We recommend an in-depth scoping review for one health topic (mental health, n = 3). Additional research is also recommended for this outcome category as a whole as there were relatively few studies examining this outcome overall.

## Discussion

This review serves as an overarching scoping review that primarily aims to identify what types of topics, interventions and designs are being used to improve access, quality and efficiency of primary care in rural and remote areas globally. A secondary aim is to provide a high-level content summary within each of these outcome areas and to provide recommendations for future research. We have separated our discussion of the results into two main sections, (i) content summary and recommendations for future research which includes a summary of the main findings to answer our objectives, and (ii) the burden of rurality and the need for rural-specific research which provides a thoughtful discussion of these results from the rural clinical perspective.

### Content summary and recommendations for further research

Overall, given our liberal search criteria, we found a low number of papers that met our inclusion criteria and an even lower number that used more rigorous randomized designs. While we did note an upward trend toward increased publications, the trend we observed peaked in 2017 before beginning a decline to pre-peak levels. In addition, the increase in the yearly number of rural primary care publications must be tempered by the fact that scientific output in

general is doubling approximately every nine years [391]. Nevertheless, the increase we observed in rural primary care literature does appear to outpace the rate of increase in general scientific productivity. Not surprisingly, a large percentage of the papers captured in this review originate from the United States, Australia and Canada, countries that have long been known to have high levels of rurality and established programs of rural health research. Notably, a substantial proportion of papers come from Africa ( $n = 35$  (9.4%), Tables 2–4) despite limited resources in those countries. European, Middle Eastern and Asian countries are under-represented in this review, likely because of relatively high population density and a lower impact of rurality at the population level. In terms of our outcome areas of interest, we will present our findings summary for each separately.

**Access:** We found the topic area of increasing access to a primary care provider one that is ready for a formal systematic review. While each of the identified three subtopics, recruitment or retention of family physicians and recruitment of an alternate care provider, have been the subject of previous reviews there hasn't been a comprehensive review of the effectiveness of all available strategies which would be of benefit as this issue is a high priority in all areas. A realist approach may work best as there are several different health system contexts to consider in likelihood of effectiveness. The topic of increasing access to primary care services included a number of different services for specific health issues such as diabetes or mental health which would benefit from a further scoping review to identify useful PICO questions.

**Efficiency:** We found only 2 topics that assessed outcomes related to improving efficiency of primary care services, mental health and pregnancy-related topics. Unfortunately, reporting regarding the outcomes of wait-times or healthcare use were unclear and follow-up with authors would be necessary to understand these outcomes in more detail before meaningful PICOs could be identified.

**Quality:** We found the majority of studies aimed to improve quality of primary care either via interventions to improve adherence to guidelines (improving evidence-based medicine) or to improve specific patient clinical outcomes. Much less attention has been paid to other aspects of quality such as patient experience or equity. The most common topics across all areas of quality were the health topics of diabetes, mental health, cancer, CVD and asthma. In our results, we made several recommendations for where the evidence is ready for systematic or scoping reviews within the specific health topics, however, looking at the data across outcomes, we would also recommend broader reviews for the same or interrelated health topics. For example, the health topics of diabetes, cancer, asthma, CVD, mental health and pregnancy all had studies that assessed interventions to improve patient clinical outcomes and adherence to/update of evidence-based care recommendations. In these cases, we would suggest conducting comprehensive reviews by these topic areas that include all outcomes of interest that have been assessed. Additionally, we found evidence to suggest systematic reviews for a number of related health topics such as weight management, alcohol use and pain management. We would suggest combining these topics to form a larger topic area such as lifestyle changes for a more impactful review. The last comment worth note, is that a realist approach would likely be required in almost all reviews to assess the findings in terms of contextual factors related to (i) geographical location, (ii) country economic status and (iii) health system status (private/public, etc.)

## The burden of rurality and the need for rural-specific research

As we all know, there is a huge and rapidly growing literature on the management of chronic diseases and their burden on society and the health system. In most jurisdictions, rurality is associated with a 2–5 year deficit in life expectancy [2, 5, 392, 393] which does not compare to



the effect of widely studied diseases such as diabetes, heart disease and stroke [394]. However, the far greater prevalence of rurality suggests that its burden, at the population level, is likely to be as great or greater than any of the chronic diseases alone. Admittedly, some of the urban/rural disparity in health outcomes is attributable to differences in rates of chronic disease [3, 4]. Thus, science that examines chronic disease may indirectly contribute to narrowing the rural-urban divide. However, health services delivery and socio-cultural issues are different in rural areas, suggesting that rural-specific research may be necessary to more completely address rural/urban health inequities than disease inquiry alone.

For this work, we deliberately chose liberal inclusion criteria to maximize reach, by including designs such as non-randomized and before-after studies, which are often excluded from reviews. During article screening, we did not tally papers that were excluded because of the lack of a comparative evaluation component (e.g., opinion pieces, rural program descriptions and uncontrolled cross-sectional evaluations), but subjectively note that this was a large number of papers. This suggests that there is considerable interest in rural healthcare delivery not reflected in this review, but a lack of resources to pursue more intensive research efforts, mirroring the lack of resources available to health service delivery in rural areas.

As we have noted in Table 2, the bulk of papers included in this review examined the quality of care delivery. We have not attempted to systematically identify whether the interventions studied in these papers were specifically tailored for rural populations or simply studied a geography-agnostic program delivered in a rural area. However, our subjective opinion is that a substantial proportion of the studied interventions did not include modifications for rural populations and provided only limited if any description of factors that may have influenced program implementation, delivery or quality specifically in the rural setting. Nearly a third of the papers examined the adoption of best practices, most of which were drawn from clinical practice guidelines which typically do not include a rural focus. Programs that did include both urban and rural programs often included only a small number of sites, limiting the generalizability of the findings. Given relatively limited attempts to create rural-specific data analyses or amendments to interventions in the quality of care papers, the contribution to the rural-specific primary care literature is somewhat less than suggested by the high number of papers in this section. This represents an important gap in the literature that could be filled by a greater number of studies that examine differences in implementation, delivery and outcomes between rural and urban sites of the same program and/or a systematic review of studies that include both rural and urban sites to elucidate factors (if any) that contribute to differences in outcomes between rural and urban populations. The results of this work could then be used to develop frameworks describing which evidence from primarily urban sites could be applied in the rural setting, and where clinical programs require modification for rural delivery.

Reflecting the challenges with and widespread attention paid to the recruitment and retention of primary care physicians as a means of overcoming one of the greatest challenges in rural care delivery [395, 396], our paper documents a considerable number of papers ( $n = 28$ ) that examined these issues, but none that used randomized designs. However, given the potential for multi-disciplinary providers to meet primary care needs, it is surprising that relatively few papers ( $n = 14$ ) examined the use of non-physician providers in the rural setting. In the broad primary care literature (i.e. not exclusively rural), there is widespread interest in multi-disciplinary primary care delivery, and many of the findings from that literature could be used to inform rural service delivery. However, as mentioned above, socio-cultural and other issues are different in rural areas, which may lead to service-delivery challenges not seen with urban teams. This issue further highlights the need for studies to determine the extent to which evidence developed in urban centres can be applied in the rural setting.

## Limitations

Given the high number of papers included in this scoping review, we have not attempted to extract specific recommendations regarding policy or service delivery, but we intend to do so in follow-up sub-topic papers. As with any review, the quality is limited by the quality of the literature search and data extraction, but we have used an experienced information specialist and duplicate data extraction approaches to mitigate these concerns. We have used the Canadian Foundation for Healthcare Improvements' 2012 policy document, entitled *Toward a Primary Care Strategy for Canada* to inform many of the working definitions for our review but we acknowledge that other frameworks and definitions exist to describe primary care and related outcomes and thus there may be some overlap or slight differences in our categorization compared to the literature [9]. Finally, in an attempt to describe the rural primary care literature as thoroughly as possible, we have classified papers into multiple categories if appropriate. Thus, interpretations about the degree of focus on a particular subject area should keep this in mind.

## Supporting information

**S1 Checklist. Preferred Reporting Items for Systematic reviews and Meta-Analyses extension for Scoping Reviews (PRISMA-ScR) checklist.**

(DOCX)

**S1 Appendix. Sample search strategy.**

(PDF)

**S2 Appendix. Details on article characteristics.**

(DOCX)

**S3 Appendix. Evidence-based practice.**

(DOCX)

**S4 Appendix. Clinical outcomes.**

(DOCX)

**S5 Appendix. Patient experience.**

(DOCX)

**S6 Appendix. Equity of care.**

(DOCX)

**S7 Appendix. Patient safety.**

(DOCX)

**S8 Appendix. Recruitment.**

(DOCX)

**S9 Appendix. Retention.**

(DOCX)

**S10 Appendix. Access to alternative primary care provider.**

(DOCX)

**S11 Appendix. Access to services not normally delivered by family physicians.**

(DOCX)

**S12 Appendix. Wait times.**  
(DOCX)

**S13 Appendix. Healthcare utilization.**  
(DOCX)

**S14 Appendix. Costing and cost effectiveness.**  
(DOCX)

## Acknowledgments

The authors wish to thank Ms. Lindsay Alcock for assistance with refining the search strategy and completing the literature search.

## Author Contributions

**Conceptualization:** Kris Aubrey-Basler, Andrea Pike, James Rourke, Shabnam Asghari, Amanda Hall.

**Data curation:** Krystal Bursey, Carla Penney, Bradley Furlong, Mark Howells, Harith Al-Obaid, Amanda Hall.

**Formal analysis:** Krystal Bursey, Andrea Pike, Carla Penney, Mark Howells, Harith Al-Obaid, Amanda Hall.

**Funding acquisition:** Kris Aubrey-Basler.

**Methodology:** Kris Aubrey-Basler, Krystal Bursey, Amanda Hall.

**Project administration:** Andrea Pike, Amanda Hall.

**Supervision:** Kris Aubrey-Basler, Amanda Hall.

**Writing – original draft:** Kris Aubrey-Basler, Krystal Bursey, Andrea Pike, James Rourke, Shabnam Asghari, Amanda Hall.

**Writing – review & editing:** Kris Aubrey-Basler, Krystal Bursey, Andrea Pike, Carla Penney, Bradley Furlong, Mark Howells, Harith Al-Obaid, James Rourke, Shabnam Asghari, Amanda Hall.

## References

1. United Nations D of E and SA Population Division,. World Urbanization Prospects: The 2018 Revision (ST/ESA/SER.A/420). New York: United Nations; 2019.
2. Subedi R, Greenberg TL, Roshanafshar S. Does geography matter in mortality? An analysis of potentially avoidable mortality by remoteness index in Canada. *Health Rep.* 2019; 30(5):3–15. <https://doi.org/10.25318/82-003-x201900500001-eng> PMID: 31091331
3. National Healthcare Quality and Disparities Report. Chartbook on Rural Health Care. Rockville, MD; 2017.
4. DesMeules M, Pong R, Lagacé C, Heng D, Manuel D, Pitblado R, et al. How Healthy Are Rural Canadians? An Assessment of their Health Status and Health Determinants. Canadian Institute for Health Information; 2006.
5. Australian Institute of Health and Welfare. Rural & remote health [Internet]. 2019. <https://www.aihw.gov.au/reports/rural-remote-australians/rural-remote-health/contents/health-status-and-outcomes>.
6. World Health Organization. Rural poverty and health systems in the WHO European Region. Copenhagen: WHO Regional Office for Europe; 2010.
7. Starfield B, Shi L, Macinko J. Contribution of Primary Care to Health Systems and Health. *Milbank Q.* 2005 Sep; 83(3):457–502. <https://doi.org/10.1111/j.1468-0009.2005.00409.x> PMID: 16202000

8. Basu S, Berkowitz SA, Phillips RL, Bitton A, Landon BE, Phillips RS. Association of Primary Care Physician Supply With Population Mortality in the United States, 2005–2015. *JAMA Intern Med.* 2019; 179(4):506–14. <https://doi.org/10.1001/jamainternmed.2018.7624> PMID: 30776056
9. Aggarwal M, Hutchison B. Toward a primary care strategy for Canada. 2012. (Canadian Foundation for Healthcare Improvement).
10. International Labour Office Social Protection Department. Global evidence on inequities in rural health protection: new data on rural deficits in health coverage for 174 countries. Geneva: ILO; 2015.
11. World Health Organization. WHO guideline on health workforce development, attraction, recruitment and retention in rural and remote areas. Geneva: World Health Organization; 2021.
12. Clarke J. Difficulty accessing health care services in Canada. Statistics Canada Catalogue no 82-624-X; 2016. (Health at a Glance).
13. World Health Organization & United Nations Children's Fund (UNICEF). A vision for primary health care in the 21st century: towards universal health coverage and the Sustainable Development Goals. Geneva: World Health Organization; 2018.
14. Aromataris E, Munn Z, editors. JBI Manual for Evidence Synthesis. Adelaide, AU: Joanna Briggs Institute; 2020.
15. Arksey H, O'Malley L. Scoping studies: towards a methodological framework. *Int J Soc Res Methodol.* 2005; 8(1):19–32.
16. Levac D, Colquhoun H, O'Brien KK. Scoping studies: advancing the methodology. *Implement Sci IS.* 2010; 5(1):69–69. <https://doi.org/10.1186/1748-5908-5-69> PMID: 20854677
17. Tricco AC, Lillie E, Zarin W, O'Brien KK, Colquhoun H, Levac D, et al. PRISMA Extension for Scoping Reviews (PRISMA-ScR): Checklist and Explanation. *Ann Intern Med.* 2018; 169(7):467–73. <https://doi.org/10.7326/M18-0850> PMID: 30178033
18. Agency for Healthcare Research and Quality. Six Domains of Health Care Quality [Internet]. <https://www.ahrq.gov/talkingquality/measure/six-domains.html>.
19. Office of Disease Prevention and Health Promotion. Access to Primary Care [Internet]. US Department of Health and Human Services; 2021. <https://www.healthypeople.gov/2020/topics-objectives/topic/social-determinants-health/interventions-resources/access-to-primary>.
20. Hawley LR, Koziol NA, Bovaird JA, McCormick CM, Welch GW, Arthur AM, et al. Defining and Describing Rural: Implications for Rural Special Education Research and Policy. *Rural Spec Educ Q.* 2016; 35(3):3–11.
21. Covidence. Better systematic review management [Internet]. <https://www.covidence.org>.
22. Ansari RM, Harris MF, Hosseinzadeh H, Zwar N. Implementation of Chronic Care Model for Diabetes Self-Management: A Quantitative Analysis. *Diabetology.* 2022 Sep; 3(3):407–22.
23. Burdick TE, Moran DS, Oliver BJ, Eilertsen A, Raymond J, Hort S, et al. Transitional Care Management Quality Improvement Methods That Reduced Readmissions in a Rural, Primary Care System. *J Am Board Fam Med.* 2022 May 1; 35(3):537–47. <https://doi.org/10.3122/jabfm.2022.03.190435> PMID: 35641053
24. Gur I, Shapira S, Halloun N, Kaisari S, Stern A. Implementing Lean Techniques to Increase the Efficiency of a Rural Primary Care Clinic: A Prospective Controlled Study. *Jt Comm J Qual Patient Saf.* 2022 May 1; 48(5):262–70. <https://doi.org/10.1016/j.jcjq.2022.01.009> PMID: 35246380
25. Harding C, Seal A, Mills N. Evaluation of a Lifestyle and Weight Management Program Within Rural General Practice. *J Prim Care Community Health.* 2022 Jan 1; 13:21501319221084170. <https://doi.org/10.1177/21501319221084166> PMID: 35289212
26. Harrison JN, Steinberg J, Wilms Floet AML, Grace N, Menon D, German R, et al. Addressing Pediatric Developmental and Mental Health in Primary Care Using Tele-Education. *Clin Pediatr (Phila).* 2022 Jan 1; 61(1):46–55. <https://doi.org/10.1177/00099228211059644> PMID: 34791907
27. Harry ML, Asche SE, Freitag LA, Sperl-Hillen JM, Saman DM, Ekstrom HL, et al. Human Papillomavirus vaccination clinical decision support for young adults in an upper midwestern healthcare system: a clinic cluster-randomized control trial. *Hum Vaccines Immunother.* 2022 Jan 31; 18(1):2040933.
28. Ndayizigiye M, McBain R, Whelley C, Lerotholi R, Mabathoana J, Carmona M, et al. Integrating an early child development intervention into an existing primary healthcare platform in rural Lesotho: a prospective case-control study. *BMJ Open.* 2022 Feb 1; 12(2):e051781. <https://doi.org/10.1136/bmjopen-2021-051781> PMID: 35121599
29. Okonofua F, Ntoimo LF, Yaya S, Igboin B, Solanke O, Ekwo C, et al. Effect of a multifaceted intervention on the utilisation of primary health for maternal and child health care in rural Nigeria: a quasi-experimental study. *BMJ Open.* 2022 Feb 1; 12(2):e049499. <https://doi.org/10.1136/bmjopen-2021-049499> PMID: 35135763

30. Osaie SP, Young HN, Fricks WP, Zillich AJ. Evaluation of quality measure attainment with pharmacist-delivered Medicare annual wellness visits. *J Am Pharm Assoc.* 2022 Mar 1; 62(2):559–63. <https://doi.org/10.1016/j.japh.2021.10.030> PMID: 34799260
31. Renn BN, Johnson M, Powers DM, Vredevoogd M, Unützer J. Collaborative care for depression yields similar improvement among older and younger rural adults. *J Am Geriatr Soc.* 2022 Jan; 70(1):110–8. <https://doi.org/10.1111/jgs.17457> PMID: 34536286
32. Srinivasan K, Heylen E, Johnson Pradeep R, Mony PK, Ekstrand ML. Collaborative care compared to enhanced standard treatment of depression with co-morbid medical conditions among patients from rural South India: a cluster randomized controlled trial (HOPE Study). *BMC Psychiatry.* 2022 Jun 13; 22(1):394. <https://doi.org/10.1186/s12888-022-04000-3> PMID: 35698087
33. Befort CA, VanWormer JJ, Desouza C, Ellerbeck EF, Gajewski B, Kimminau KS, et al. Effect of Behavioral Therapy With In-Clinic or Telephone Group Visits vs In-Clinic Individual Visits on Weight Loss Among Patients With Obesity in Rural Clinical Practice: A Randomized Clinical Trial. *JAMA.* 2021 Jan 26; 325(4):363–72. <https://doi.org/10.1001/jama.2020.25855> PMID: 33496775
34. Camargo MS, Passos LCS, Mistro S, Soares DA, Kochergin CN, dos S de Carvalho VCH, et al. Improving Access to the Glycated Hemoglobin Test in Rural Communities With Point-of-Care Devices: An Application Study. *Front Med [Internet].* 2021 [cited 2023 Jul 24]; 8. Available from: <https://www.frontiersin.org/articles/10.3389/fmed.2021.734306>.
35. Chen S, Qian D, Burström B. Two-year impact of an educational intervention in primary care on blood glucose control and diabetes knowledge among patients with type 2 diabetes mellitus: a study in rural China. *Glob Health Action.* 2021 Jan 1; 14(1):1893502. <https://doi.org/10.1080/16549716.2021.1893502> PMID: 33825677
36. Chevillard G, Mousquès J. Medically underserved areas: are primary care teams efficient at attracting and retaining general practitioners? *Soc Sci Med.* 2021 Oct 1; 287:114358. <https://doi.org/10.1016/j.socscimed.2021.114358> PMID: 34520939
37. de Batlle J, Massip M, Vargiu E, Nadal N, Fuentes A, Bravo MO, et al. Implementing Mobile Health-Enabled Integrated Care for Complex Chronic Patients: Intervention Effectiveness and Cost-Effectiveness Study. *JMIR MHealth UHealth.* 2021 Jan 14; 9(1):e22135. <https://doi.org/10.2196/22135> PMID: 33443486
38. Deng A, Zhang Y, Xiong R. Effects of a transitional care program for individuals with limbs disabilities living in a rural community: A randomized controlled trial. *Disabil Health J.* 2021 Jan 1; 14(1):100946. <https://doi.org/10.1016/j.dhjo.2020.100946> PMID: 32565092
39. Katzmarzyk PT, Apolzan JW, Gajewski B, Johnson WD, Martin CK, Newton RL, et al. Weight loss in primary care: A pooled analysis of two pragmatic cluster-randomized trials. *Obesity.* 2021 Dec; 29(12):2044–54. <https://doi.org/10.1002/oby.23292> PMID: 34714976
40. Kirkland EB, Marsden J, Zhang J, Schumann SO, Bian J, Mauldin P, et al. Remote patient monitoring sustains reductions of hemoglobin A1c in underserved patients to 12 months. *Prim Care Diabetes.* 2021 Jun 1; 15(3):459–63. <https://doi.org/10.1016/j.pcd.2021.01.005> PMID: 33509728
41. Muyambi K, Gillam M, Dennis S, Gray R, Martinez L, Jones M. Effect of depression awareness and management training on the attitudes of rural primary health care workers. *Aust J Rural Health.* 2021; 29(3):449–54. <https://doi.org/10.1111/ajr.12685> PMID: 34110058
42. Ogobara Dougnon A, Charle-Cuéllar P, Toure F, Aziz Gado A, Sanoussi A, Lazoumar RH, et al. Impact of Integration of Severe Acute Malnutrition Treatment in Primary Health Care Provided by Community Health Workers in Rural Niger. *Nutrients.* 2021 Nov; 13(11):4067. <https://doi.org/10.3390/nu13114067> PMID: 34836322
43. Pati MK, Bhojani U, Elias MA, Srinivas PN. Improving access to medicines for non-communicable diseases in rural primary care: results from a quasi-randomized cluster trial in a district in South India. *BMC Health Serv Res.* 2021 Aug 4; 21(1):770. <https://doi.org/10.1186/s12913-021-06800-x> PMID: 34348723
44. Poudiougou O, Bruand PE, Mounkoro PP, Gagliione JM, Nimaga K, Sy M, et al. Mental health capacity building in Mali by training rural general practitioners and raising community awareness. *Pan Afr Med J [Internet].* 2021 Apr 21 [cited 2023 Jul 24]; 38(389). Available from: <https://www.panafrican-med-journal.com/content/article/38/389/full>. <https://doi.org/10.11604/pamj.2021.38.389.26838> PMID: 34381533
45. Schepens Niemiec SL, Vigen CLP, Martínez J, Blanchard J, Carlson M. Long-Term Follow-Up of a Lifestyle Intervention for Late-Midlife, Rural-Dwelling Latinos in Primary Care. *Am J Occup Ther.* 2021 Jan 25; 75(2):7502205020. <https://doi.org/10.5014/ajot.2021.042861> PMID: 33657344
46. Stallings AM, Dixon C, Carter A, Ali A, Herring C. Evaluation of a Pharmacist-Managed Hypertension Clinic in a Rural Primary Care Setting. *J Pharm Pract.* 2021 Dec 1; 34(6):844–9. <https://doi.org/10.1177/0897190020926841> PMID: 32452264

47. Sylaja PN, Singh G, Sivasambath S, Arun K, Jeemon P, Antony R, et al. Secondary prevention of stroke by a primary health care approach: An open-label cluster randomised trial. *J Clin Neurosci*. 2021 Feb; 84:53–9. <https://doi.org/10.1016/j.jocn.2020.12.006> PMID: 33485600
48. Wagner RG, Norström F, Bertram MY, Tollman S, Forsgren L, Newton CR, et al. Community health workers to improve adherence to anti-seizure medication in rural South Africa: Is it cost-effective? *Epilepsia*. 2021; 62(1):98–106. <https://doi.org/10.1111/epi.16756> PMID: 33236782
49. Zittleman L, Curcija K, Nease DE, Fisher M, Miriam Dickinson L, Thomas JF, et al. Increasing Capacity for Treatment of Opioid Use Disorder in Rural Primary Care Practices. *Ann Fam Med*. 2022 Jan; 20(1):18–23. <https://doi.org/10.1370/afm.2757> PMID: 35074763
50. Ameh S. Evaluation of an integrated HIV and hypertension management model in rural South Africa: a mixed methods approach. *Glob Health Action*. 2020 Dec 31; 13(1):1750216. <https://doi.org/10.1080/16549716.2020.1750216> PMID: 32316885
51. Bellesheim KR, Kizzee RL, Curran A, Sohl K. ECHO Autism: Integrating Maintenance of Certification with Extension for Community Healthcare Outcomes Improves Developmental Screening. *J Dev Behav Pediatr*. 2020 Aug; 41(6):420. <https://doi.org/10.1097/DBP.0000000000000796> PMID: 32735419
52. Bowen DJ, Powers DM, Russo J, Arao R, LePoire E, Sutherland E, et al. Implementing collaborative care to reduce depression for rural native American/Alaska native people. *BMC Health Serv Res*. 2020 Jan 13; 20(1):34. <https://doi.org/10.1186/s12913-019-4875-6> PMID: 31931791
53. Brown JD, Hales S, Evans TE, Turner T, Sword DO, O'Neil PM, et al. Description, utilisation and results from a telehealth primary care weight management intervention for adults with obesity in South Carolina. *J Telemed Telecare*. 2020 Jan 1; 26(1–2):28–35. <https://doi.org/10.1177/1357633X18789562> PMID: 30045661
54. Chen S, Qian D, Burström K, Burström B. Impact of an educational intervention in primary care on fasting blood glucose levels and diabetes knowledge among patients with type 2 diabetes mellitus in rural China. *Patient Educ Couns*. 2020 Sep 1; 103(9):1767–73. <https://doi.org/10.1016/j.pec.2020.03.010> PMID: 32414563
55. Chen S, Qian D, Burström B. Shifting the Care of Type 2 Diabetes Mellitus from Hospital to Primary Health Care Institutions through an Educational Intervention for Health Care Professionals: An Example from Rural China. *Int J Environ Res Public Health*. 2020 Jan; 17(6):2076. <https://doi.org/10.3390/ijerph17062076> PMID: 32245060
56. Deng A, Yang S, Xiong R. Effects of an integrated transitional care program for stroke survivors living in a rural community: a randomized controlled trial. *Clin Rehabil*. 2020 Apr; 34(4):524–32. <https://doi.org/10.1177/0269215520905041> PMID: 32026701
57. Espinet SD, Gotovac S, Knight S, Wissow L, Zwarenstein M, Lingard L, et al. Primary Care Practitioner Training in Child and Adolescent Psychiatry (PTCAP): A Cluster-Randomized Trial. *Can J Psychiatry*. 2020 May 1; 65(5):319–29. <https://doi.org/10.1177/0706743719890161> PMID: 31813273
58. Gordon HS, Pugach O, Solanki P, Gopal RK. A brief pre-visit educational video improved patient engagement after telehealth visits; results from a randomized controlled trial. *PEC Innov*. 2022 Dec 1; 1:100080. <https://doi.org/10.1016/j.pecinn.2022.100080> PMID: 37213724
59. Gu J, Zhu S, Chen T, Tang J, Pan Z, Gong J, et al. Evaluation of the Spring Seedling Project—Zhao-tong Program: A study of a novel continuing medical education program for rural doctors in China. *Aust J Rural Health*. 2020 Oct; 28(5):434–42. <https://doi.org/10.1111/ajr.12659> PMID: 32985023
60. Hine JF, Allin J, Allman A, Black M, Browning B, Ramsey B, et al. Increasing Access to Autism Spectrum Disorder Diagnostic Consultation in Rural and Underserved Communities: Streamlined Evaluation Within Primary Care. *J Dev Behav Pediatr*. 2020 Jan; 41(1):16. <https://doi.org/10.1097/DBP.0000000000000727> PMID: 31490843
61. Kitchener S. Local regional workforce returns on investment of a locally governed and delivered general practice vocational training program. *Aust Health Rev Publ Aust Hosp Assoc*. 2020 Apr; 44(2):254–7. <https://doi.org/10.1071/AH18027> PMID: 30922437
62. Larson E, Mbaruku GM, Cohen J, Kruk ME. Did a quality improvement intervention improve quality of maternal health care? Implementation evaluation from a cluster-randomized controlled study. *Int J Qual Health Care J Int Soc Qual Health Care*. 2020 Apr 21; 32(1):54–63. <https://doi.org/10.1093/intqhc/mzz126> PMID: 31829427
63. LeCloux MA, Weimer M, Culp SL, Bjorkgren K, Service S, Campo JV. The Feasibility and Impact of a Suicide Risk Screening Program in Rural Adult Primary Care: A Pilot Test of the Ask Suicide-Screening Questions Toolkit. *Psychosomatics*. 2020 Nov 1; 61(6):698–706. <https://doi.org/10.1016/j.psym.2020.05.002> PMID: 32646611
64. Morris-Paxton AA, Reid S, Ewing RMG. Primary healthcare services in the rural Eastern Cape, South Africa: Evaluating a service-support project. *Afr J Prim Health Care Fam Med*. 2020 Apr 2; 12(1):7.

65. Myers LA, Carlson PN, Krantz PW, Johnson HL, Will MD, Bjork TM, et al. Development and Implementation of a Community Paramedicine Program in Rural United States. *West J Emerg Med Integrating Emerg Care Popul Health* [Internet]. 2020 [cited 2023 Jul 24]; 21(5). Available from: <https://escholarship.org/uc/item/30k1q0j8>. <https://doi.org/10.5811/westjem.2020.7.44571> PMID: 32970579
66. Nagykaldi Z, Scheid D, Zhao YD, Mishra B, Greever-Rice T. A Sustainable Model for Preventive Services in Rural Counties: The Healthier Together Study. *J Am Board Fam Med*. 2020 Sep 1; 33(5):698–706. <https://doi.org/10.3122/jabfm.2020.05.190357> PMID: 32989064
67. Orchard J, Li J, Freedman B, Webster R, Salkeld G, Hespe C, et al. Atrial Fibrillation Screen, Management, and Guideline-Recommended Therapy in the Rural Primary Care Setting: A Cross-Sectional Study and Cost-Effectiveness Analysis of eHealth Tools to Support All Stages of Screening. *J Am Heart Assoc*. 2020 Sep 15; 9(18):e017080. <https://doi.org/10.1161/JAHA.120.017080> PMID: 32865129
68. Peckens S, Linger N, Capito J, Adelman MM, Peklinsky R, Crocetti E, et al. Improving Nephropathy Screening in Appalachian Patients With Diabetes Using Practice-Wide Outreach.
69. Powers DM, Bowen DJ, Arao RF, Vredevoogd M, Russo J, Grover T, et al. Rural clinics implementing collaborative care for low-income patients can achieve comparable or better depression outcomes. *Fam Syst Health*. 2020; 38(3):242–54. <https://doi.org/10.1037/fsh0000522> PMID: 32700931
70. Prudencio J, Kim M. Diabetes-Related Patient Outcomes through Comprehensive Medication Management Delivered by Clinical Pharmacists in a Rural Family Medicine Clinic. *Pharmacy*. 2020 Sep; 8(3):115. <https://doi.org/10.3390/pharmacy8030115> PMID: 32660091
71. Pu X, Huang T, Wang X, Gu Y. Realigning the provider payment system for primary health care: a pilot study in a rural county of Zhejiang Province, China. *Prim Health Care Res Dev*. 2020 Jan; 21:e43. <https://doi.org/10.1017/S1463423620000444> PMID: 33032674
72. Smith SL, Franke MF, Rusangwa C, Mukasakindi H, Nyirandagijimana B, Bienvenu R, et al. Outcomes of a primary care mental health implementation program in rural Rwanda: A quasi-experimental implementation-effectiveness study. *PLOS ONE*. 2020 Feb 21; 15(2):e0228854. <https://doi.org/10.1371/journal.pone.0228854> PMID: 32084663
73. Stack M, LaRouche V, Zhang Y, Warden D, Stack C, Klugiene EA. Effects of Implementing a Comprehensive Opioid Reduction Protocol on Overall Opioid Prescribing among Patients with Chronic, Non-Cancer Pain in a Rural Family Medicine Clinic: A Controlled Cross-over Trial. *J Am Board Fam Med JABFM*. 2020; 33(4):502–11. <https://doi.org/10.3122/jabfm.2020.04.200060> PMID: 32675261
74. Worster DT, Franke MF, Bazúa R, Flores H, García Z, Krupp J, et al. Observational stepped-wedge analysis of a community health worker-led intervention for diabetes and hypertension in rural Mexico. *BMJ Open*. 2020 Mar 1; 10(3):e034749. <https://doi.org/10.1136/bmjopen-2019-034749> PMID: 32152172
75. Yapa HM, Neve JWD, Chetty T, Herbst C, Post FA, Jiamsakul A, et al. The impact of continuous quality improvement on coverage of antenatal HIV care tests in rural South Africa: Results of a stepped-wedge cluster-randomised controlled implementation trial. *PLOS Med*. 2020 Oct 7; 17(10):e1003150. <https://doi.org/10.1371/journal.pmed.1003150> PMID: 33027246
76. So A, De Gagne JC, Park S. Long-Term Effects of a Self-management Program for Older Women With Urinary Incontinence in Rural Korea: A Comparison Cohort Study. *J Wound Ostomy Continence Nurs*. 2019 Feb; 46(1):55. <https://doi.org/10.1097/WON.0000000000000498> PMID: 30608342
77. Anastasaki M, Trigoni M, Pantouvaki A, Trouli M, Mavrogianni M, Chavannes N, et al. Establishing a pulmonary rehabilitation programme in primary care in Greece: A FRESH AIR implementation study. *Chron Respir Dis*. 2019; 16:1479973119882939. <https://doi.org/10.1177/1479973119882939> PMID: 31742441
78. Belcher T, Vess J, Johnson E. Using Patient Portal Messaging to Improve Glycemic Control in Adult Patients with Diabetes in Saudi Arabia.
79. Buist E, McLelland R, Rushworth GF, Stewart D, Gibson-Smith K, MacLure A, et al. An evaluation of mental health clinical pharmacist independent prescribers within general practice in remote and rural Scotland. *Int J Clin Pharm*. 2019 Oct 1; 41(5):1138–42. <https://doi.org/10.1007/s11096-019-00897-1> PMID: 31493208
80. Campbell DG, McGrail MR, O'Sullivan B, Russell DJ. Outcomes of a 1-year longitudinal integrated medical clerkship in small rural Victorian communities. *Rural Remote Health*. 2019 Jun; 19(2):4987. <https://doi.org/10.22605/RRH4987> PMID: 31340654
81. Chen S, Burström B, Sparring V, Qian D, Burström K. Differential Impact of an Education-Based Intervention for Patients with Type 2 Diabetes Mellitus in Rural China. *Int J Environ Res Public Health*. 2019 Jul 26; 16(15):2676. <https://doi.org/10.3390/ijerph16152676> PMID: 31357408
82. Chevillard G, Mousquès J, Lucas-Gabrielli V, Rican S. Has the diffusion of primary care teams in France improved attraction and retention of general practitioners in rural areas? *Health Policy*. 2019 May 1; 123(5):508–15. <https://doi.org/10.1016/j.healthpol.2019.03.002> PMID: 30898365

83. Chiswell E, Hampton D, Okoli CTC. Effect of Patient and Provider Education on Antibiotic Overuse for Respiratory Tract Infections. *J Healthc Qual JHQ*. 2019 Jun; 41(3):e13. <https://doi.org/10.1097/JHQ.000000000000144> PMID: 31094953
84. Cummings DM, Lutes LD, Littlewood K, Solar C, Carraway M, Kirian K, et al. Randomized Trial of a Tailored Cognitive Behavioral Intervention in Type 2 Diabetes With Comorbid Depressive and/or Regimen-Related Distress Symptoms: 12-Month Outcomes From COMRADE. *Diabetes Care*. 2019 Mar 4; 42(5):841–8. <https://doi.org/10.2337/dc18-1841> PMID: 30833367
85. Dahlberg D, Hiott DB, Wilson CC. Implementing Pediatric Fluoride Varnish Application in a Rural Primary Care Medical Office: A Feasibility Study. *J Pediatr Health Care*. 2019 Nov; 33(6):702–10. <https://doi.org/10.1016/j.pedhc.2019.06.002> PMID: 31477489
86. Gatakaa H, Ombech E, Omondi R, Otiato J, Waringa V, Okomo G, et al. Expanding access to maternal, newborn and primary healthcare services through private-community-government partnership clinic models in rural Kenya: the Ubuntu-Afya kiosk model. *BMC Health Serv Res*. 2019 Nov 29; 19(1):914. <https://doi.org/10.1186/s12913-019-4759-9> PMID: 31783753
87. Hanlon C, Medhin G, Selamu M, Birhane R, Dewey M, Tirfessa K, et al. Impact of integrated district level mental health care on clinical and social outcomes of people with severe mental illness in rural Ethiopia: an intervention cohort study. *Epidemiol Psychiatr Sci*. 2019 Aug 13; 29:e45. <https://doi.org/10.1017/S2045796019000398> PMID: 31405401
88. Beyrami HJ, Doshmangir L, Ahmadi A, Jafarabadi MA, Morasae EK, Gordeev VS. Impact of rural Family Physician programme on maternal and child health indicators in Iran: an interrupted time series analysis. *BMJ Open*. 2019 Jan 1; 9(1):e021761. <https://doi.org/10.1136/bmjopen-2018-021761> PMID: 30647030
89. Jarrett T, Cochran J, Baus A, Delmar K. MedManage: The development of a tool to assist medication reconciliation in a rural primary care clinic. *J Am Assoc Nurse Pract*. 2019 Dec; 31(12):760. <https://doi.org/10.1097/JXX.000000000000197> PMID: 30829980
90. King DE, Petrone AB, Alcantara FM, Elavsky MM, Prestoza MO, Siebart J, et al. Outcomes in an Interdisciplinary Diabetes Clinic in Rural Primary Care. *South Med J*. 2019 Apr; 112(4):205–9. <https://doi.org/10.14423/SMJ.0000000000000960> PMID: 30943537
91. Logan DE, Lavoie AM, Zwick WR, Kunz K, Bumgardner MA, Molina Y. Integrating addiction medicine into rural primary care: Strategies and initial outcomes. *J Consult Clin Psychol*. 2019; 87(10):952–61. <https://doi.org/10.1037/ccp0000410> PMID: 31556671
92. McLendon SF, Wood FG, Stanley N. Enhancing diabetes care through care coordination, telemedicine, and education: Evaluation of a rural pilot program. *Public Health Nurs*. 2019; 36(3):310–20. <https://doi.org/10.1111/phn.12601> PMID: 30868661
93. Moe GC, Moe JES, Bailey AL. Evaluating the implementation of collaborative teams in community family practice using the Primary Care Assessment Tool. *Can Fam Physician Med Fam Can*. 2019 Dec; 65(12):e515–22. PMID: 31831500
94. Buschkoetter KLM, Powell W, Mazour L. Implementation of a Comprehensive Diabetic Foot Exam Protocol in Rural Primary Care. *Online J Rural Nurs Health Care*. 2019 Apr 29;43–63.
95. Mutiso VN, Pike K, Musyimi CW, Rebello TJ, Tele A, Gitonga I, et al. Feasibility of WHO mhGAP-intervention guide in reducing experienced discrimination in people with mental disorders: a pilot study in a rural Kenyan setting. *Epidemiol Psychiatr Sci*. 2019 Apr; 28(2):156–67. <https://doi.org/10.1017/S2045796018000264> PMID: 29862937
96. Parchman ML, Penfold RB, Ike B, Tauben D, Von Korff M, Stephens M, et al. Team-Based Clinic Redesign of Opioid Medication Management in Primary Care: Effect on Opioid Prescribing. *Ann Fam Med*. 2019 Jul; 17(4):319–25. <https://doi.org/10.1370/afm.2390> PMID: 31285209
97. Patel A, Praveen D, Maharani A, Oceandy D, Pilard Q, Kohli MPS, et al. Association of Multifaceted Mobile Technology-Enabled Primary Care Intervention With Cardiovascular Disease Risk Management in Rural Indonesia. *JAMA Cardiol*. 2019 Oct 1; 4(10):978–86. <https://doi.org/10.1001/jamacardio.2019.2974> PMID: 31461123
98. Reed JR, Estabrooks P, Pozehl B, Heelan K, Wichman C. Effectiveness of the 5A's Model for Changing Physical Activity Behaviors in Rural Adults Recruited From Primary Care Clinics. *J Phys Act Health*. 2019 Dec 1; 16(12):1138–46. <https://doi.org/10.1123/jpah.2018-0477> PMID: 31553946
99. Ward J, Guy RJ, Rumbold AR, McGregor S, Wand H, McManus H, et al. Strategies to improve control of sexually transmissible infections in remote Australian Aboriginal communities: a stepped-wedge, cluster-randomised trial. *Lancet Glob Health*. 2019 Nov 1; 7(11):e1553–63. [https://doi.org/10.1016/S2214-109X\(19\)30411-5](https://doi.org/10.1016/S2214-109X(19)30411-5) PMID: 31607467
100. Wei MH, Chen XZ, Zhan XX, Zhang ZX, Yu SJ, Yan WR. The effect of a web-based training for improving primary health care providers' knowledge about diabetes mellitus management in rural China: A



- pre-post intervention study. PLOS ONE. 2019 Sep 24; 14(9):e0222930. <https://doi.org/10.1371/journal.pone.0222930> PMID: 31550282
101. Wei X, Zhang Z, Hicks JP, Walley JD, King R, Newell JN, et al. Long-term outcomes of an educational intervention to reduce antibiotic prescribing for childhood upper respiratory tract infections in rural China: Follow-up of a cluster-randomised controlled trial. PLoS Med. 2019 Feb; 16(2):e1002733. <https://doi.org/10.1371/journal.pmed.1002733> PMID: 30721234
  102. Wong H, Moore K, Angstman KB, Garrison GM. Impact of rural address and distance from clinic on depression outcomes within a primary care medical home practice. BMC Fam Pract. 2019 Sep 5; 20(1):123. <https://doi.org/10.1186/s12875-019-1015-7> PMID: 31488051
  103. Zheng X, Xiao F, Li R, Yin D, Xin Q, Yang H, et al. The effectiveness of hypertension management in China: a community-based intervention study. Prim Health Care Res Dev. 2019 Jan; 20:e111. <https://doi.org/10.1017/S1463423618000853> PMID: 32799973
  104. Amritanand A, Paul P, Jasper S, Kumar S, Abraham V. Incorporating primary eye care into primary health care: Piloting a perceived visual disability questionnaire based model in rural southern India—An observational study. Indian J Ophthalmol. 2018; 66(7):957–62. [https://doi.org/10.4103/ijo.IJO\\_144\\_18](https://doi.org/10.4103/ijo.IJO_144_18) PMID: 29941739
  105. Boltz M, Cuellar NG, Cole C, Pistorese B. Comparing an on-site nurse practitioner with telemedicine physician support hospitalist programme with a traditional physician hospitalist programme. J Telemed Telecare. 2019; 25(4):213–20. <https://doi.org/10.1177/1357633X18758744> PMID: 29498301
  106. Bonnell S, Griggs A, Avila G, Mack J, Bush RA, Vignato J, et al. Community Health Workers and Use of mHealth: Improving Identification of Pregnancy Complications and Access to Care in the Dominican Republic. Health Promot Pract. 2018; 19(3):331–40. <https://doi.org/10.1177/1524839917708795> PMID: 28578606
  107. Boon L, Fisher H, Reuter H, Maconick L, Petrie A, Jenkins LS. Mental health in primary care: Integration through in-service training in a South African rural clinic. Afr J Prim Health Care Fam Med. 2018; 10(1):1–7.
  108. Bouchonville MF, Hager BW, Kirk JB, Qualls CR, Arora S. ENDO ECHO IMPROVES PRIMARY CARE PROVIDER AND COMMUNITY HEALTH WORKER SELF-EFFICACY IN COMPLEX DIABETES MANAGEMENT IN MEDICALLY UNDERSERVED COMMUNITIES. Endocr Pract. 2018; 24(1):40–6. <https://doi.org/10.4158/EP-2017-0079> PMID: 29368967
  109. Causer LM, Guy RJ, Tabrizi SN, Whiley DM, Speers DJ, Ward J, et al. Molecular test for chlamydia and gonorrhoea used at point of care in remote primary healthcare settings: a diagnostic test evaluation. Sex Transm Infect. 2018 Aug; 94(5):340–5. <https://doi.org/10.1136/sextrans-2017-053443> PMID: 29748180
  110. Collins S, Byrne M, Hawe J, O'Reilly G. Evaluation of a computerized cognitive behavioural therapy programme, MindWise (2.0), for adults with mild-to-moderate depression and anxiety. Br J Clin Psychol. 2018; 57(2):255–69. <https://doi.org/10.1111/bjc.12165> PMID: 29197102
  111. No Child Left Behind: A Quality Improvement Clinical Implementation to Improve the Treatment Outcomes, Quality of Care, and Quality of Life for School-Aged Children with Attention-Deficit/Hyperactivity Disorder at a Rural Primary Care Practice—ProQuest [Internet]. [cited 2023 Jul 24]. <https://www.proquest.com/openview/c68deff0b488f16b094cab9bdd7c8f41/1?pq-origsite=gscholar&cbl=18750>.
  112. Falamić S, Lucijanić M, Hadžabić MO, Marušić S, Bačić Vrca V. Pharmacist's interventions improve time in therapeutic range of elderly rural patients on warfarin therapy: a randomized trial. Int J Clin Pharm. 2018; 40(5):1078–85. <https://doi.org/10.1007/s11096-018-0691-z> PMID: 30051222
  113. Gao W, Li G, Liu X, Yan H. The impact of “Child Care” intervention in rural Primary Health Care Program on prevalence of diarrhea among children less than 36 months of age in rural western China. BMC Pediatr. 2018 Jul 11; 18(1):228. <https://doi.org/10.1186/s12887-018-1172-1> PMID: 29996805
  114. Giuliano L, Cicero CE, Padilla S, Camargo M, Sofia V, Zappia M, et al. Knowledge, attitudes, and practices towards epilepsy among general practitioners in rural Bolivia: Results before and after a training program on epilepsy. Epilepsy Behav. 2018 Jun 1; 83:113–8. <https://doi.org/10.1016/j.yebeh.2018.02.030> PMID: 29694941
  115. Goldstein S, Hubbard R. Standardized Contraceptive Handout Facilitates Contraceptive Counseling. Fam Med. 2018; 50(2):146–8. <https://doi.org/10.22454/FamMed.2018.388877> PMID: 29432632
  116. Hocking JS, Temple-Smith M, Guy R, Donovan B, Braat S, Law M, et al. Population effectiveness of opportunistic chlamydia testing in primary care in Australia: a cluster-randomised controlled trial. Lancet Br Ed. 2018; 392(10156):1413–22.
  117. Hotu C, Rémond M, Maguire G, Ekinci E, Cohen N. Impact of an integrated diabetes service involving specialist outreach and primary health care on risk factors for micro- and macrovascular diabetes

- complications in remote Indigenous communities in Australia. *Aust J Rural Health*. 2018; 26(6):394–9. <https://doi.org/10.1111/ajr.12426> PMID: 29864201
118. Howe JL, Penrod JD, Gottesman E, Bean A, Kramer BJ. The rural interdisciplinary team training program: a workforce development workshop to increase geriatrics knowledge and skills for rural providers. *Gerontol Geriatr Educ*. 2019; 40(1):3–15. <https://doi.org/10.1080/02701960.2018.1454917> PMID: 29583103
  119. Khalil H, Lee S. The implementation of a successful medication safety program in a primary care. *J Eval Clin Pract*. 2018; 24(2):403–7. <https://doi.org/10.1111/jep.12870> PMID: 29322597
  120. Kirby S, Lyle D, Jones D, Brunero C, Purcell A, Dettwiller P. Design and delivery of an innovative speech pathology service-learning program for primary school children in Far West NSW, Australia. *Public Health Res Pract*. 2018; 28(3). <https://doi.org/10.17061/phrp28231806> PMID: 30406259
  121. Kramer BJ, Creekmur B, Mitchell MN, Saliba D. Expanding Home-Based Primary Care to American Indian Reservations and Other Rural Communities: An Observational Study. *J Am Geriatr Soc*. 2018; 66(4):818–24. <https://doi.org/10.1111/jgs.15193> PMID: 29529341
  122. Kranker K, Barterian LM, Sarwar R, Peterson GG, Gilman B, Blue L, et al. Rural hospital transitional care program reduces Medicare spending. *Am J Manag Care*. 2018 May; 24(5):256–60. PMID: 29851443
  123. Lutes LD, Cummings DM, Littlewood K, Solar C, Carraway M, Kirian K, et al. COMRADE: A randomized trial of an individually tailored integrated care intervention for uncontrolled type 2 diabetes with depression and/or distress in the rural southeastern US. *Contemp Clin Trials*. 2018 Jul 1; 70:8–14. <https://doi.org/10.1016/j.cct.2018.04.007> PMID: 29680319
  124. Mallow JA, Theeke LA, Theeke E, Mallow BK. The effectiveness of mI SMART: A nurse practitioner led technology intervention for multiple chronic conditions in primary care. *Int J Nurs Sci*. 2018 Apr 10; 5(2):131–7. <https://doi.org/10.1016/j.ijnss.2018.03.009> PMID: 31406814
  125. Martinez B, Ixen EC, Hall-Clifford R, Juarez M, Miller AC, Francis A, et al. mHealth intervention to improve the continuum of maternal and perinatal care in rural Guatemala: a pragmatic, randomized controlled feasibility trial. *Reprod Health*. 2018; 15(1):120–120. <https://doi.org/10.1186/s12978-018-0554-z> PMID: 29973229
  126. Meade LT, Tart RC, Buzby HL. Evaluation of Diabetes Education and Pharmacist Interventions in a Rural, Primary Care Setting. *Diabetes Spectr*. 2018 Feb 1; 31(1):90–5. <https://doi.org/10.2337/ds16-0064> PMID: 29456431
  127. Naidoo N, Railton JP, Khosa SN, Matlakala N, Marincowitz G, McIntyre JA, et al. Fidelity of HIV programme implementation by community health workers in rural Mopani district, South Africa: a community survey. *BMC Public Health*. 2018; 18(1):1099–1099. <https://doi.org/10.1186/s12889-018-5927-2> PMID: 30189855
  128. Prabhakaran D, Jha D, Prieto-Merino D, Roy A, Singh K, Ajay VS, et al. Effectiveness of an mHealth-Based Electronic Decision Support System for Integrated Management of Chronic Conditions in Primary Care: The mWellcare Cluster-Randomized Controlled Trial. *Circ N Y N*. 2018; 139(3):380–91. <https://doi.org/10.1161/CIRCULATIONAHA.118.038192> PMID: 30586732
  129. Rojas G, Guajardo V, Martínez P, Castro A, Fritsch R, Moessner M, et al. A Remote Collaborative Care Program for Patients with Depression Living in Rural Areas: Open-Label Trial. *J Med Internet Res*. 2018; 20(4):e158–e158. <https://doi.org/10.2196/jmir.8803> PMID: 29712627
  130. Saleh S, Alameddine M, Farah A, El Arnaut N, Dimassi H, Muntaner C, et al. eHealth as a facilitator of equitable access to primary healthcare: the case of caring for non-communicable diseases in rural and refugee settings in Lebanon. *Int J Public Health*. 2018; 63(5):577–88. <https://doi.org/10.1007/s00038-018-1092-8> PMID: 29546440
  131. Saleh S, Farah A, Dimassi H, El Arnaut N, Constantin J, Osman M, et al. Using Mobile Health to Enhance Outcomes of Noncommunicable Diseases Care in Rural Settings and Refugee Camps: Randomized Controlled Trial. *JMIR MHealth UHealth*. 2018; 6(7):e137–e137. <https://doi.org/10.2196/mhealth.8146> PMID: 30006326
  132. Schepens Niemiec SL, Blanchard J, Vigen CLP, Martínez J, Guzmán L, Concha A, et al. Evaluation of ¡Vivir Mi Vida! to improve health and wellness of rural-dwelling, late middle-aged Latino adults: results of a feasibility and pilot study of a lifestyle intervention. *Prim Health Care Res Dev*. 2018; 19(5):448–63.
  133. Tiruneh GT, Karim AM, Avan BI, Zemichael NF, Wereta TG, Wickremasinghe D, et al. The effect of implementation strength of basic emergency obstetric and newborn care (BEmONC) on facility deliveries and the met need for BEmONC at the primary health care level in Ethiopia. *BMC Pregnancy Childbirth*. 2018; 18(1):123–123. <https://doi.org/10.1186/s12884-018-1751-z> PMID: 29720108
  134. Vail B, Morgan MC, Spindler H, Christmas A, Cohen SR, Walker DM. The power of practice: simulation training improving the quality of neonatal resuscitation skills in Bihar, India. *BMC Pediatr*. 2018 Sep 3; 18(1):291. <https://doi.org/10.1186/s12887-018-1254-0> PMID: 30176831

135. Vandenberg AE, Echt KV, Kemp L, McGwin G, Perkins MM, Mirk AK. Academic Detailing with Provider Audit and Feedback Improve Prescribing Quality for Older Veterans. *J Am Geriatr Soc JAGS*. 2018; 66(3):621–7. <https://doi.org/10.1111/jgs.15247> PMID: 29532466
136. Witt TJ, Deyo-Svendsen ME, Mason ER, Deming JR, Stygar KK, Rosas SL, et al. A Model for Improving Adherence to Prescribing Guidelines for Chronic Opioid Therapy in Rural Primary Care. *Mayo Clin Proc Innov Qual Outcomes*. 2018; 2(4):317–23. <https://doi.org/10.1016/j.mayocpiqo.2018.09.004> PMID: 30560233
137. Wu JR, Cummings DM, Li Q, Hinderliter A, Bosworth HB, Tillman J, et al. The effect of a practice-based multicomponent intervention that includes health coaching on medication adherence and blood pressure control in rural primary care. *J Clin Hypertens*. 2018; 20(4):757–64. <https://doi.org/10.1111/jch.13265> PMID: 29577574
138. Yugbaré Belemsaga D, Goujon A, Tougri H, Coulibaly A, Degomme O, Duysburgh E, et al. Integration of maternal postpartum services in maternal and child health services in Kaya health district (Burkina Faso): an intervention time trend analysis. *BMC Health Serv Res*. 2018; 18(1):298–298. <https://doi.org/10.1186/s12913-018-3098-6> PMID: 29685138
139. Zhang Z, Dawkins B, Hicks JP, Walley JD, Hulme C, Elsey H, et al. Cost-effectiveness analysis of a multi-dimensional intervention to reduce inappropriate antibiotic prescribing for children with upper respiratory tract infections in China. *Trop Med Int Health*. 2018; 23(10):1092–100. <https://doi.org/10.1111/tmi.13132> PMID: 30058210
140. Zunza M, Von Pressentin KB, Chinhoyi RL. The impact of family physician supply on district health system performance, clinical processes and clinical outcomes in the Western Cape Province, South Africa (2011–2014). *Afr J Prim Health Care Fam Med*. 2018; 10(1):1–10. <https://doi.org/10.4102/phcfm.v10i1.1442> PMID: 29781689
141. Ameh S, Klipstein-Grobusch K, Musenge E, Kahn K, Tollman S, Gómez-Olivé FX. Effectiveness of an Integrated Approach to HIV and Hypertension Care in Rural South Africa: Controlled Interrupted Time-Series Analysis. *J Acquir Immune Defic Syndr* 1999. 2017; 75(4):472–9. <https://doi.org/10.1097/QAI.0000000000001437> PMID: 28640065
142. Bailie R, Matthews V, Larkins S, Thompson S, Burgess P, Weeramanthri T, et al. Impact of policy support on uptake of evidence-based continuous quality improvement activities and the quality of care for Indigenous Australians: a comparative case study. *BMJ Open*. 2017; 7(10):e016626–e016626. <https://doi.org/10.1136/bmjopen-2017-016626> PMID: 28982818
143. Baldwin LM, Morrison C, Griffin J, Anderson N, Edwards K, Green J, et al. Bidirectional Text Messaging to Improve Adherence to Recommended Lipid Testing. *J Am Board Fam Med*. 2017; 30(5):608–14. <https://doi.org/10.3122/jabfm.2017.05.170088> PMID: 28923813
144. Barnett AW. Structured Physical Activity and Dietary Education Program for Obese Adolescents: An Evaluation of a Quality Improvement Project at a Rural Primary Care Clinic.
145. Basu S, Landon BE, Williams JW, Bitton A, Song Z, Phillips RS. Behavioral Health Integration into Primary Care: a Microsimulation of Financial Implications for Practices. *J Gen Intern Med*. 2017 Dec 1; 32(12):1330–41. <https://doi.org/10.1007/s11606-017-4177-9> PMID: 28900839
146. Bocoum FY, Tarnagda G, Bationo F, Savadogo JR, Nacro S, Kouanda S, et al. Introducing onsite antenatal syphilis screening in Burkina Faso: implementation and evaluation of a feasibility intervention tailored to a local context. *BMC Health Serv Res*. 2017; 17(1):378–378. <https://doi.org/10.1186/s12913-017-2325-x> PMID: 28558812
147. Brown W, Scott D, Friesner D, Schmitz T. Impact of telepharmacy services as a way to increase access to asthma care. *J Asthma*. 2017; 54(9):961–7. <https://doi.org/10.1080/02770903.2017.1281292> PMID: 28095068
148. Carey TA, Arundell M, Schouten K, Humphreys JS, Miegel F, Murphy S, et al. Reducing hospital admissions in remote Australia through the establishment of a palliative and chronic disease respite facility. *BMC Palliat Care*. 2017; 16(1):54–54. <https://doi.org/10.1186/s12904-017-0247-3> PMID: 29162145
149. Cené CW, Halladay JR, Gizlice Z, Donahue KE, Cummings DM, Hinderliter A, et al. A multicomponent quality improvement intervention to improve blood pressure and reduce racial disparities in rural primary care practices. *J Clin Hypertens Greenwich Conn*. 2017; 19(4):351–60. <https://doi.org/10.1111/jch.12944> PMID: 27886435
150. Doyle D, Tommarello C, Broce M, Emmett M, Pollard C. Implementation and Outcomes of a Community-Based Pulmonary Rehabilitation Program in Rural Appalachia. *J Cardiopulm Rehabil Prev*. 2017; 37(4):295–8. <https://doi.org/10.1097/HCR.000000000000247> PMID: 28306684
151. Emery JD, Gray V, Walter FM, Cheetham S, Croager EJ, Slevin T, et al. The Improving Rural Cancer Outcomes Trial: a cluster-randomised controlled trial of a complex intervention to reduce time to

- diagnosis in rural cancer patients in Western Australia. *Br J Cancer*. 2017 Nov; 117(10):1459–69. <https://doi.org/10.1038/bjc.2017.310> PMID: 28926528
152. Feltner F, Thompson S, Baker W, Slone M. Community health workers improving diabetes outcomes in a rural Appalachian population. *Soc Work Health Care*. 2017; 56(2):115–23. <https://doi.org/10.1080/00981389.2016.1263269> PMID: 27976983
  153. Fisher E, Hasselberg M, Conwell Y, Weiss L, Padrón NA, Tiernan E, et al. Telementoring Primary Care Clinicians to Improve Geriatric Mental Health Care. *Popul Health Manag*. 2017; 20(5):342–7. <https://doi.org/10.1089/pop.2016.0087> PMID: 28106511
  154. Halladay JR, Donahue KE, Cené CW, Li Q, Cummings DM, Hinderliter AL, et al. The association of health literacy and blood pressure reduction in a cohort of patients with hypertension: The heart healthy lenoir trial. *Patient Educ Couns*. 2017 Mar 1; 100(3):542–9. <https://doi.org/10.1016/j.pec.2016.10.015> PMID: 27776790
  155. Hansel T, Rohrer G, Osofsky J, Osofsky H, Arthur E, Barker C. Integration of Mental and Behavioral Health in Pediatric Health Care Clinics. *J Public Health Manag Pract*. 2017; 23 Suppl 6 Suppl, Gulf Region Health Outreach Program:S19–24. <https://doi.org/10.1097/PHH.0000000000000649> PMID: 28961648
  156. Hountz D, Coddington J, Foli KJ, Thorlton J. Increasing Colorectal Cancer Screening Using a Quality Improvement Approach in a Nurse-Managed Primary Care Clinic. *J Healthc Qual*. 2017; 39(6):379–90. <https://doi.org/10.1097/JHQ.000000000000107> PMID: 29045284
  157. Improving patient services: mentored community diabetes clinics in West Suffolk—DiabetesontheNet [Internet]. 2017 [cited 2023 Jul 27]. <https://diabetesonthenet.com/journal-diabetes-nursing/improving-patient-services-mentored-community-diabetes-clinics-west-suffolk/>.
  158. Inch J, Notman F, Watson M, Green D, Baird R, Ferguson J, et al. Tele-pharmacy in rural Scotland: a proof of concept study. *Int J Pharm Pract*. 2017; 25(3):210–9. <https://doi.org/10.1111/ijpp.12376> PMID: 28466547
  159. Iyer HS, Hirschhorn LR, Nisingizwe MP, Kamanzi E, Drobac PC, Rwabukwisi FC, et al. Impact of a district-wide health center strengthening intervention on healthcare utilization in rural Rwanda: Use of interrupted time series analysis. *PLoS One*. 2017; 12(8):e0182418–e0182418. <https://doi.org/10.1371/journal.pone.0182418> PMID: 28763505
  160. Jordans MJD, Kohrt BA, Luitel NP, Lund C, Komproe IH. Proactive community case-finding to facilitate treatment seeking for mental disorders, Nepal. *Bull World Health Organ*. 2017; 95(7):531–6. <https://doi.org/10.2471/BLT.16.189282> PMID: 28670018
  161. Kiemtoré S, Zamané H, Kaïn DP, Sawadogo YA, Ouédraogo I, Ouédraogo A, et al. Effects of an intervention initiated by a national society to improve postabortion care in rural facilities in Burkina Faso. *Int J Gynecol Obstet*. 2017; 136(2):215–9. <https://doi.org/10.1002/ijgo.12031> PMID: 28099728
  162. Klein DM, Pham K, Samy L, Bluth A, Nazi KM, Witry M, et al. The Veteran-Initiated Electronic Care Coordination: A Multisite Initiative to Promote and Evaluate Consumer-Mediated Health Information Exchange. *Telemed J E Health*. 2017; 23(4):264–72. <https://doi.org/10.1089/tmj.2016.0078> PMID: 27726644
  163. Liddy C, McKellips F, Armstrong CD, Afkham A, Fraser-Roberts L, Keely E. Improving access to specialists in remote communities: a cross-sectional study and cost analysis of the use of eConsult in Nunavut. *Int J Circumpolar Health*. 2017 Jan 1; 76(1):1323493. <https://doi.org/10.1080/22423982.2017.1323493> PMID: 28570207
  164. Lifson AR, Workneh S, Hailemichael A, Demisse W, Slater L, Shenie T. Implementation of a Peer HIV Community Support Worker Program in Rural Ethiopia to Promote Retention in Care. *J Int Assoc Provid AIDS Care*. 2017; 16(1):75–80. <https://doi.org/10.1177/2325957415614648> PMID: 26518590
  165. Malekpour M, Neuhaus N, Martin D, Widom K, Rapp M, Leonard D, et al. Changes in rural trauma pre-hospital times following the Rural Trauma Team Development Course training. *Am J Surg*. 2017; 213(2):399–404. <https://doi.org/10.1016/j.amjsurg.2016.06.015> PMID: 27575601
  166. Matousek AC, Addington SR, Kahan J, Sannon H, Luckner T, Exe C, et al. Patient Navigation by Community Health Workers Increases Access to Surgical Care in Rural Haiti. *World J Surg*. 2017; 41(12):3025–30. <https://doi.org/10.1007/s00268-017-4246-6> PMID: 28948326
  167. Maulik PK, Kallakuri S, Devarapalli S, Vadlamani VK, Jha V, Patel A. Increasing use of mental health services in remote areas using mobile technology: a pre-post evaluation of the SMART Mental Health project in rural India. *J Glob Health*. 2017; 7(1):010408–010408. <https://doi.org/10.7189/jogh.07.010408> PMID: 28400954
  168. Moeckli J, Stewart KR, Ono S, Alexander B, Goss T, Maier M, et al. Mixed-Methods Study of Uptake of the Extension for Community Health Outcomes (ECHO) Telemedicine Model for Rural Veterans With HIV. *J Rural Health*. 2017; 33(3):323–31. <https://doi.org/10.1111/jrh.12200> PMID: 27557039
  169. Mueller Y, Mpala Q, Kerschberger B, Rusch B, McHunu G, Mazibuko S, et al. Adherence, tolerability, and outcome after 36 months of isoniazid-preventive therapy in 2 rural clinics of Swaziland: A

- prospective observational feasibility study. *Med Baltim.* 2017; 96(35):e7740–e7740. <https://doi.org/10.1097/MD.00000000000007740> PMID: 28858089
170. Naderimagham S, Jamshidi H, Khajavi A, Pishgar F, Ardani A, Larijani B, et al. Impact of rural family physician program on child mortality rates in Iran: a time-series study. *Popul Health Metr.* 2017; 15(1):21–21. <https://doi.org/10.1186/s12963-017-0138-0> PMID: 28576122
  171. Nagykaldi ZJ, Scheid D, Zhao D, Mishra B, Greever-Rice T. An Innovative Community-based Model for Improving Preventive Care in Rural Counties. *J Am Board Fam Med.* 2017; 30(5):583–91. <https://doi.org/10.3122/jabfm.2017.05.170035> PMID: 28923810
  172. Omotayo MO, Dickin KL, Pelletier DL, Mwanga EO, Kung'u JK, Stoltzfus RJ. A Simplified Regimen Compared with WHO Guidelines Decreases Antenatal Calcium Supplement Intake for Prevention of Preeclampsia in a Cluster-Randomized Noninferiority Trial in Rural Kenya. *J Nutr.* 2017; 147(10):1986–91. <https://doi.org/10.3945/jn.117.251926> PMID: 28878035
  173. Parsons EC, Mattox EA, Beste LA, Au DH, Young BA, Chang MF, et al. Development of a Sleep Telementorship Program for Rural Department of Veterans Affairs Primary Care Providers: Sleep Veterans Affairs Extension for Community Healthcare Outcomes. *Ann Am Thorac Soc.* 2017; 14(2):267–74. <https://doi.org/10.1513/AnnalsATS.201605-361BC> PMID: 27977293
  174. Paul CL, Piterman L, Shaw JE, Kirby C, Forshaw KL, Robinson J, et al. Poor uptake of an online intervention in a cluster randomised controlled trial of online diabetes education for rural general practitioners. *Trials.* 2017; 18(1):137–137. <https://doi.org/10.1186/s13063-017-1869-8> PMID: 28335809
  175. Paz-Pacheco E, Sandoval MA, Ardena GJR, Paterno E, Juban N, Lantion-Ang FL, et al. Effectiveness of a community-based diabetes self-management education (DSME) program in a rural agricultural setting. *Prim Health Care Res Dev.* 2017; 18(1):35–49. <https://doi.org/10.1017/S1463423616000335> PMID: 27640303
  176. Peterson M, Turgesen J, Fisk L, McCarthy S. Integrated Care in Rural Health: Seeking Sustainability. *Fam Syst Health.* 2017; 35(2):167–73. <https://doi.org/10.1037/fsh0000267> PMID: 28617018
  177. Rebello KE, Gosian J, Salow M, Sweeney P, Rudolph JL, Driver JA. The Rural PILL Program: A Post-discharge Telepharmacy Intervention for Rural Veterans. *J Rural Health.* 2017; 33(3):332–9. <https://doi.org/10.1111/jrh.12212> PMID: 27606938
  178. Sam-Agudu NA, Ramadhani HO, Isah C, Anaba U, Ereka S, Fan-Osuala C, et al. The Impact of Structured Mentor Mother Programs on 6-Month Postpartum Retention and Viral Suppression among HIV-Positive Women in Rural Nigeria: A Prospective Paired Cohort Study. *JAIDS J Acquir Immune Defic Syndr.* 2017 Jun 1; 75:S173. <https://doi.org/10.1097/QAI.0000000000001346> PMID: 28498187
  179. Sartor P, Colaiani I, Cardinal MV, Bua J, Freilij H, Gürtler RE. Improving access to Chagas disease diagnosis and etiologic treatment in remote rural communities of the Argentine Chaco through strengthened primary health care and broad social participation. *PLoS Negl Trop Dis.* 2017; 11(2):e0005336–e0005336. <https://doi.org/10.1371/journal.pntd.0005336> PMID: 28192425
  180. Shetty R, Samant J, Nayak K, Maiya M, Reddy S. Feasibility of Telecardiology Solution to Connect Rural Health Clinics to a Teaching Hospital. *Indian J Community Med.* 2017; 42(3):170–3. [https://doi.org/10.4103/ijcm.IJCM\\_368\\_16](https://doi.org/10.4103/ijcm.IJCM_368_16) PMID: 28852283
  181. Tewari A, Kallakuri S, Devarapalli S, Jha V, Patel A, Maulik PK. Process evaluation of the systematic medical appraisal, referral and treatment (SMART) mental health project in rural India. *BMC Psychiatry.* 2017; 17(1):385–385. <https://doi.org/10.1186/s12888-017-1525-6> PMID: 29202773
  182. van de Mortel TF, Marr K, Burmeister E, Koppe H, Ahern C, Walsh R, et al. Reducing avoidable admissions in rural community palliative care: a pilot study of care coordination by General Practice registrars. *Aust J Rural Health.* 2017; 25(3):141–7. <https://doi.org/10.1111/ajr.12309> PMID: 27380901
  183. Vellakkal S, Gupta A, Khan Z, Stuckler D, Reeves A, Ebrahim S, et al. Has India's national rural health mission reduced inequities in maternal health services? A pre-post repeated cross-sectional study. *Health Policy Plan.* 2017; 32(1):79–90. <https://doi.org/10.1093/heapol/czw100> PMID: 27515405
  184. Wei X, Zhang Z, Walley JD, Hicks JP, Zeng J, Deng S, et al. Effect of a training and educational intervention for physicians and caregivers on antibiotic prescribing for upper respiratory tract infections in children at primary care facilities in rural China: a cluster-randomised controlled trial. *Lancet Glob Health.* 2017 Dec; 5(12):e1258–67. [https://doi.org/10.1016/S2214-109X\(17\)30383-2](https://doi.org/10.1016/S2214-109X(17)30383-2) PMID: 29102353
  185. Wells S, Rafter N, Kenealy T, Herd G, Eggleton K, Lightfoot R, et al. The impact of a point-of-care testing device on CVD risk assessment completion in New Zealand primary-care practice: A cluster randomised controlled trial and qualitative investigation. *PLoS One.* 2017; 12(4):e0174504–e0174504. <https://doi.org/10.1371/journal.pone.0174504> PMID: 28422968
  186. Whealin JM, Yoneda AC, Nelson D, Hilmes TS, Kawasaki MM, Yan OH. A Culturally Adapted Family Intervention for Rural Pacific Island Veterans With PTSD. *Psychol Serv.* 2017; 14(3):295–306. <https://doi.org/10.1037/ser0000186> PMID: 28805414

187. Yan LD, Chirwa C, Chi BH, Bosomprah S, Sindano N, Mwanza M, et al. Hypertension management in rural primary care facilities in Zambia: a mixed methods study. *BMC Health Serv Res.* 2017; 17(1):111–111. <https://doi.org/10.1186/s12913-017-2063-0> PMID: 28158981
188. Zarrabian M, Bidos A, Fanti C, Young B, Drew B, Puskas D, et al. Improving spine surgical access, appropriateness and efficiency in metropolitan, urban and rural settings. *Can J Surg.* 2017 Oct 1; 60(5):342–8. <https://doi.org/10.1503/cjs.016116> PMID: 30246685
189. Zhan X, Zhang Z, Sun F, Liu Q, Peng W, Zhang H, et al. Effects of Improving Primary Health Care Workers' Knowledge About Public Health Services in Rural China: A Comparative Study of Blended Learning and Pure E-Learning. *J Med Internet Res.* 2017 May 1; 19(5):e116. <https://doi.org/10.2196/jmir.6453> PMID: 28461286
190. Bottorff JL, Seaton CL, Viney N, Stolp S, Krueckl S, Holm N. The Stop Smoking Before Surgery Program: Impact on Awareness of Smoking-Related Perioperative Complications and Smoking Behavior in Northern Canadian Communities. *J Prim Care Community Health.* 2016; 7(1):16–23. <https://doi.org/10.1177/2150131915604827> PMID: 26385995
191. Boyle J, Hollands G, Beck S, Hampel G, Wapau H, Arnot M, et al. Process evaluation of a pilot evidence-based Polycystic Ovary Syndrome clinic in the Torres Strait. *Aust J Rural Health.* 2017; 25(3):175–81. <https://doi.org/10.1111/ajr.12288> PMID: 27086940
192. Castellani J, Mihaylova B, Ajayi IO, Siribie M, Nsungwa-Sabiiti J, Afonne C, et al. Quantifying and Valuing Community Health Worker Time in Improving Access to Malaria Diagnosis and Treatment. *Clin Infect Dis.* 2016; 63(suppl 5):S298–305. <https://doi.org/10.1093/cid/ciw629> PMID: 27941108
193. Chen L, Du X, Zhang L, van Velthoven MH, Wu Q, Yang R, et al. Effectiveness of a smartphone app on improving immunization of children in rural Sichuan Province, China: a cluster randomized controlled trial. *BMC Public Health.* 2016; 16(1):909–909. <https://doi.org/10.1186/s12889-016-3549-0> PMID: 27581655
194. Crossland L, Askew D, Ware R, Cranstoun P, Mitchell P, Bryett A, et al. Diabetic Retinopathy Screening and Monitoring of Early Stage Disease in Australian General Practice: Tackling Preventable Blindness within a Chronic Care Model. *J Diabetes Res.* 2015; 2016:8405395–7. <https://doi.org/10.1155/2016/8405395> PMID: 26798655
195. Das J, Chowdhury A, Hussam R, Banerjee AV. The impact of training informal health care providers in India: A randomized controlled trial. *Science.* 2016 Oct 7; 354(6308):aaf7384. <https://doi.org/10.1126/science.aaf7384> PMID: 27846471
196. Dumphy D, Thompson J, Clark M. A Breastfeeding Quality Improvement Project in Rural Primary Care. *J Hum Lact.* 2016; 32(4):633–41. <https://doi.org/10.1177/0890334416662240> PMID: 27502513
197. Flum E, Goetz K, Berger S, Ledig T, Steinhäuser J. Can a “rural day” make a difference to GP shortage across rural Germany? *Rural Remote Health.* 2016; 16(1):3628–3628. PMID: 26924228
198. Frail CK, Garza OW, Haas AL. Experience with technology-supported transitions of care to improve medication use. *J Am Pharm Assoc.* 2016; 56(5):568–72. <https://doi.org/10.1016/j.japh.2016.04.565> PMID: 27521168
199. Hontelez J, Tanser F, Naidu KK, Pillay D, Bärnighausen T. The effect of antiretroviral treatment on health care utilization in rural South Africa: A population-based cohort study. *PloS One.* 2016; 11(7):e0158015–e0158015. <https://doi.org/10.1371/journal.pone.0158015> PMID: 27384178
200. Iwuji CC, Orne-Gliemann J, Larmarange J, Okesola N, Tanser F, Thiebaut R, et al. Uptake of Home-Based HIV Testing, Linkage to Care, and Community Attitudes about ART in Rural KwaZulu-Natal, South Africa: Descriptive Results from the First Phase of the ANRS 12249 TasP Cluster-Randomised Trial. *PLoS Med.* 2016; 13(8):e1002107–e1002107. <https://doi.org/10.1371/journal.pmed.1002107> PMID: 27504637
201. Kompala T, Moll AP, Mtungwa N, Brooks RP, Friedland GH, Shenoi SV. Impact of nurse-delivered community-based CD4 services on facilitating pre-ART care in rural South Africa. *BMC Health Serv Res.* 2016; 16(a):374–374. <https://doi.org/10.1186/s12913-016-1627-8> PMID: 27515233
202. Lin IB, Coffin J, O'Sullivan PB. Using theory to improve low back pain care in Australian Aboriginal primary care: a mixed method single cohort pilot study. *BMC Fam Pract.* 2016; 17(1):44–44. <https://doi.org/10.1186/s12875-016-0441-z> PMID: 27068773
203. Mark S, Du Toit S, Noakes TD, Nordli K, Coetzee D, Makin M, et al. A successful lifestyle intervention model replicated in diverse clinical settings. *S Afr Med J.* 2016; 106(8):763–6. <https://doi.org/10.7196/SAMJ.2016.v106i8.10136> PMID: 27499396
204. Mehl-Madrona L, Mainguy B, Plummer J. Integration of Complementary and Alternative Medicine Therapies into Primary-Care Pain Management for Opiate Reduction in a Rural Setting. *J Altern Complement Med N Y N.* 2016; 22(8):621–6.
205. Miao Y, Zhang L, Sparring V, Sandeep S, Tang W, Sun X, et al. Improving health related quality of life among rural hypertensive patients through the integrative strategy of health services delivery: a quasi-

- experimental trial from Chongqing, China. *Int J Equity Health*. 2016; 15(1):132–132. <https://doi.org/10.1186/s12939-016-0421-x> PMID: 27552845
206. Mitchell GK, Senior HE, Bibo MP, Makoni B, Young SN, Rosenberg JP, et al. Evaluation of a pilot of nurse practitioner led, GP supported rural palliative care provision. *BMC Palliat Care*. 2016; 15(1):93–93. <https://doi.org/10.1186/s12904-016-0163-y> PMID: 27829425
  207. Patel S, Koku Awoonor-Williams J, Asuru R, Boyer CB, Awopole Yepakeh Tiah J, Sheff MC, et al. Benefits and Limitations of a Community-Engaged Emergency Referral System in a Remote, Impoverished Setting of Northern Ghana. *Glob Health Sci Pract*. 2016; 4(4):552–67. <https://doi.org/10.9745/GHSP-D-16-00253> PMID: 28031297
  208. Rodríguez Villa S, Alonso Álvarez C, de Dios del Valle R, Salazar Méndez R, Cuesta García M, Ruiz García MJ, et al. Five-year experience of tele-ophthalmology for diabetic retinopathy screening in a rural population. *Arch Soc Esp Ophthalmol Engl Ed*. 2016; 91(9):426–30.
  209. Shakya S, Karmacharya BM, Afset JE, Bofin A, Ásvold BO, Syversen U, et al. Community-Based Health Education has Positive Influence on the Attitude to Cervical Cancer Screening among Women in Rural Nepal. *J Cancer Educ*. 2015; 31(3):547–53.
  210. Shiferaw S, Spigt M, Tekie M, Abdullah M, Fantahun M, Dinant GJ. The Effects of a Locally Developed mHealth Intervention on Delivery and Postnatal Care Utilization; A Prospective Controlled Evaluation among Health Centres in Ethiopia. *PLoS One*. 2016; 11(7):e0158600–e0158600. <https://doi.org/10.1371/journal.pone.0158600> PMID: 27383186
  211. Siribié M, Ajayi IO, Nsungwa-Sabiiti J, Afonne C, Balyeku A, Falade CO, et al. Training Community Health Workers to Manage Uncomplicated and Severe Malaria: Experience From 3 Rural Malaria-Endemic Areas in Sub-Saharan Africa. *Clin Infect Dis*. 2016; 63(suppl 5):S264–9. <https://doi.org/10.1093/cid/ciw624> PMID: 27941103
  212. Smyth B, Marsden P, Corcoran R, Walsh R, Brennan C, McSharry K, et al. Opportunistic screening for atrial fibrillation in a rural area. *QJM Mon J Assoc Physicians*. 2016; 109(8):539–43. <https://doi.org/10.1093/qjmed/hcw011> PMID: 26819299
  213. Taylor JD, Goletz SE. Using area health education centers to promote interest in rural practice. *Rural Remote Health*. 2016; 16(3):3934–3934. PMID: 27629933
  214. Tokuda L, Lorenzo L, Theriault A, Taveira TH, Marquis L, Head H, et al. The utilization of video-conference shared medical appointments in rural diabetes care. *Int J Med Inform Shannon Irel*. 2016; 93:34–41. <https://doi.org/10.1016/j.ijmedinf.2016.05.007> PMID: 27435945
  215. Tomiak E, Chlabcic S, Mizgala E, Lukas W, Panasiuk L, Drzastwa W, et al. Prevention of cardiovascular disease in a rural general practice. *Ann Agric Environ Med*. 2016; 23(4):553–8. <https://doi.org/10.5604/12321966.1226845> PMID: 28030922
  216. Wendling AL, Phillips J, Short W, Fahey C, Mavis B. Thirty Years Training Rural Physicians: Outcomes From the Michigan State University College of Human Medicine Rural Physician Program. *Acad Med*. 2016; 91(1):113–9. <https://doi.org/10.1097/ACM.0000000000000885> PMID: 26332428
  217. Wu J, Li X, Song Y, Shao H, Shi Q, Qin D, et al. The impact of a bundled policy intervention on improving the performance of rural healthcare in China. *Int J Equity Health*. 2016; 15(1):46–46. <https://doi.org/10.1186/s12939-016-0334-8> PMID: 26964860
  218. Bodicoat DH, Mundet X, Davies MJ, Khunti K, Roura P, Franch J, et al. The impact of a programme to improve quality of care for people with type 2 diabetes on hard to reach groups: The GEDAPS study. *Prim Care Diabetes*. 2014; 9(3):211–8. <https://doi.org/10.1016/j.pcd.2014.08.001> PMID: 25189137
  219. Kirby SMsP, Moore MMFMIH, McCarron TRN, Perkins DP, Lyle DMP. Nurse-led diabetes management in remote locations. *Can J Rural Med*. 2015; 20(2):51–5. PMID: 25849752
  220. Kozłowski JLDNPRNCPC, Lusk PDNPRNPBCF, Melnyk BMRNCPFFFF. Pediatric Nurse Practitioner Management of Child Anxiety in a Rural Primary Care Clinic With the Evidence-Based COPE Program. *J Pediatr Health Care*. 2015; 29(3):274–82. <https://doi.org/10.1016/j.pedhc.2015.01.009> PMID: 25801377
  221. Lou P, Chen P, Zhang P, Yu J, Wang Y, Chen N, et al. A COPD health management program in a community-based primary care setting: a randomized controlled trial. *Respir Care*. 2015; 60(1):102–12. <https://doi.org/10.4187/respcare.03420> PMID: 25371402
  222. McClellan DA, Ojinnaka CO, Pope R, Simmons J, Fuller K, Richardson A, et al. Expanding Access to Colorectal Cancer Screening: Benchmarking Quality Indicators in a Primary Care Colonoscopy Program. *J Am Board Fam Med*. 2015; 28(6):713–21. <https://doi.org/10.3122/jabfm.2015.06.140342> PMID: 26546646
  223. McDermott RA, Schmidt B, Preece C, Owens V, Taylor S, Li M, et al. Community health workers improve diabetes care in remote Australian Indigenous communities: results of a pragmatic cluster randomized controlled trial. *BMC Health Serv Res*. 2015; 15(1):68–68. <https://doi.org/10.1186/s12913-015-0695-5> PMID: 25884300

224. Parra-Medina D, Mojica C, Liang Y, Ouyang Y, Ramos AI, Gomez I. Promoting Weight Maintenance among Overweight and Obese Hispanic Children in a Rural Practice. *Child Obes.* 2015; 11(4):355–63. <https://doi.org/10.1089/chi.2014.0120> PMID: 25950140
225. Pyne JM, Fortney JC, Mouden S, Lu L, Hudson TJ, Mittal D. Cost-Effectiveness of On-Site Versus Off-Site Collaborative Care for Depression in Rural FQHCs. *Psychiatr Serv.* 2015 May; 66(5):491–9. <https://doi.org/10.1176/appi.ps.201400186> PMID: 25686811
226. Schnippel K, Lince-Deroche N, van den Handel T, Molefi S, Bruce S, Firnhaber C. Cost evaluation of reproductive and primary health care mobile service delivery for women in two rural districts in South Africa. *PLoS One.* 2015; 10(3):e0119236–e0119236. <https://doi.org/10.1371/journal.pone.0119236> PMID: 25751528
227. Tuntland H, Aaslund MK, Espehaug B, Førland O, Kjekten I. Reablement in community-dwelling older adults: a randomised controlled trial. *BMC Geriatr.* 2015; 15(143):145–145. <https://doi.org/10.1186/s12877-015-0142-9> PMID: 26537789
228. Wibbenmeyer L, Kluesner K, Wu H, Eid A, Heard J, Mann B, et al. Video-Enhanced Telemedicine Improves the Care of Acutely Injured Burn Patients in a Rural State. *J Burn Care Res.* 2016; 37(6):e531–8. <https://doi.org/10.1097/BCR.0000000000000268> PMID: 26132049
229. Yun S, Ehrhardt E, Britt L, Brendel B, Wilson J, Berwanger A. Missouri Community, Public Health, and Primary Care Linkage: 2011–2012 Pilot Project Results & Evaluation. *Mo Med.* 2015; 112(4):323–8.
230. Baldwin KM, Black D, Hammond S. Developing a Rural Transitional Care Community Case Management Program Using Clinical Nurse Specialists. *Clin Nurse Spec.* 2014; 28(3):147–55. <https://doi.org/10.1097/NUR.0000000000000044> PMID: 24714432
231. Barahimi H, Aghighi M, Aghayani K, Foroushani AR. Chronic Kidney Disease Management Program in Shahreza, Iran. *Iran J Kidney Dis.* 2014; 8(6):450. PMID: 25362219
232. Blattner K. Evaluation of a rural primary-referred cardiac exercise tolerance test service. *N Z Med J.* 2014; 127(1406):63–70. PMID: 25447250
233. Cicutto L, Dingae MB, Langmack EL. Improving Asthma Care in Rural Primary Care Practices: A Performance Improvement Project. *J Contin Educ Health Prof.* 2014; 34(4):205–14. <https://doi.org/10.1002/chp.21254> PMID: 25530290
234. Dignan M, Shelton B, Slone SA, Tolle C, Mohammad S, Schoenberg N, et al. Effectiveness of a primary care practice intervention for increasing colorectal cancer screening in Appalachian Kentucky. *Prev Med.* 2013; 58:70–4. <https://doi.org/10.1016/j.ypmed.2013.10.018> PMID: 24212061
235. Josif CM, Barclay L, Kruske S, Kildea S. 'No more strangers': Investigating the experiences of women, midwives and others during the establishment of a new model of maternity care for remote dwelling aboriginal women in northern Australia. *Midwifery.* 2014; 30(3):317–23. <https://doi.org/10.1016/j.midw.2013.03.012> PMID: 23676699
236. Köhler L, Meinke-Franze C, Hein J, Fendrich K, Heymann R, Thyrian JR, et al. Does an Interdisciplinary Network Improve Dementia Care? Results from the IDemUck-Study. *Curr Alzheimer Res.* 2014; 11(6):538–48. <https://doi.org/10.2174/1567205011666140618100727> PMID: 24938504
237. Nelson SD, Nelson RE, Cannon GW, Lawrence P, Battistone MJ, Grotzke M, et al. Cost-effectiveness of training rural providers to identify and treat patients at risk for fragility fractures. *Osteoporos Int.* 2014; 25(12):2701–7. <https://doi.org/10.1007/s00198-014-2815-1> PMID: 25037601
238. Nelson RE, Battistone MJ, Ashworth WD, Barker AM, Grotzke M, Huhtala TA, et al. Cost Effectiveness of Training Rural Providers to Perform Joint Injections. *Arthritis Care Res.* 2014; 66(4):559–66. <https://doi.org/10.1002/acr.22179> PMID: 24106223
239. Prasad S, Dunn W, Hillier LM, McAiney CA, Warren R, Rutherford P. Rural Geriatric Glue: A Nurse Practitioner-Led Model of Care for Enhancing Primary Care for Frail Older Adults within an Ecosystem Approach. *J Am Geriatr Soc JAGS. J Am Geriatr Soc* 62:1772–1780, 2014. 2014; 62(9):1772–80.
240. Wiechman SA, Carrougher GJ, Esselman PC, Klein MB, Martinez EM, Engrav LH, et al. An expanded delivery model for outpatient burn rehabilitation. *J Burn Care Res.* 2015; 36(1):14–22. <https://doi.org/10.1097/BCR.0000000000000153> PMID: 25198101
241. Yip W, Powell-Jackson T, Chen W, Hu M, Fe E, Hu M, et al. Capitation combined with pay-for-performance improves antibiotic prescribing practices in rural China. *Health Aff Web Exclus.* 2014; 33(3):502–10. <https://doi.org/10.1377/hlthaff.2013.0702> PMID: 24572187
242. Zou G, Wei X, Gong W, Yin J, Walley J, Yu Y, et al. Evaluation of a systematic cardiovascular disease risk reduction strategy in primary healthcare: an exploratory study from Zhejiang, China. *J Public Health Oxf Engl.* 2015; 37(2):241–50. <https://doi.org/10.1093/pubmed/fdu013> PMID: 24696086
243. Branda ME, LeBlanc A, Shah ND, Tiedje K, Ruud K, Van Houten H, et al. Shared decision making for patients with type 2 diabetes: a randomized trial in primary care. *BMC Health Serv Res.* 2013; 13(1):301–301. <https://doi.org/10.1186/1472-6963-13-301> PMID: 23927490



244. Bray PMAL, Cummings DMPFCPF, Morrissey SMA, Thompson DDNPRNCDE, Holbert DP, Tanenberg RMD, et al. Improved Outcomes in Diabetes Care for Rural African Americans. *Ann Fam Med*. 2013; 11(2):145–50. <https://doi.org/10.1370/afm.1470> PMID: 23508601
245. Gardiner M, Kearns H, Tiggemann M. Effectiveness of cognitive behavioural coaching in improving the well-being and retention of rural general practitioners. *Aust J Rural Health*. 2013; 21(3):183–9. <https://doi.org/10.1111/ajr.12033> PMID: 23782287
246. Greene J. An Examination of Pay-for-Performance in General Practice in Australia. *Health Serv Res*. 2013; 48(4):1415–32. <https://doi.org/10.1111/1475-6773.12033> PMID: 23350933
247. Honeycutt S, Green R, Ballard D, Hermstad A, Brueder A, Haardörfer R, et al. Evaluation of a patient navigation program to promote colorectal cancer screening in rural Georgia, USA. *Cancer*. 2013; 119(16):3059–66. <https://doi.org/10.1002/cncr.28033> PMID: 23719894
248. Jamieson JL, Kernahan J, Calam B, Sivertz KS. One program, multiple training sites: does site of family medicine training influence professional practice location? *Rural Remote Health*. 2013; 13(4):2496–2496. PMID: 24329573
249. Krantz MJ, Coronel SM, Whitley EM, Dale R, Yost J, Estacio RO. Effectiveness of a community health worker cardiovascular risk reduction program in public health and health care settings. *Am J Public Health* 1971. 2013; 103(1):e19–27. <https://doi.org/10.2105/AJPH.2012.301068> PMID: 23153152
250. MacDowell M, Glasser M, Hunsaker M. A Decade of Rural Physician Workforce Outcomes for the Rockford Rural Medical Education (RMED) Program, University of Illinois. *Acad Med*. 2013; 88(12):1941–7. <https://doi.org/10.1097/ACM.0000000000000031> PMID: 24128632
251. Petrany SM, Gress T. Comparison of Academic and Practice Outcomes of Rural and Traditional Track Graduates of a Family Medicine Residency Program. *Acad Med*. 2013; 88(6):819–23. <https://doi.org/10.1097/ACM.0b013e318290014c> PMID: 23619075
252. Rabinowitz HK, Diamond JJ, Markham FW, Santana AJ. Retention of rural family physicians after 20–25 years: outcomes of a comprehensive medical school rural program. *J Am Board Fam Med*. 2013; 26(1):24–7. <https://doi.org/10.3122/jabfm.2013.01.120122> PMID: 23288277
253. Rashidian A, Joudaki H, Khodayari-Moez E, Omranikhoo H, Geraili B, Arab M. The impact of rural health system reform on hospitalization rates in the Islamic Republic of Iran: an interrupted time series. *Bull World Health Organ*. 2013; 91(12):942–9. <https://doi.org/10.2471/BLT.12.111708> PMID: 24347733
254. Walker D, DeMaria L, Gonzalez-Hernandez D, Padron-Salas A, Romero-Alvarez M, Suarez L. Are all skilled birth attendants created equal? A cluster randomised controlled study of non-physician based obstetric care in primary health care clinics in Mexico. *Midwifery*. 2013; 29(10):1199–205. <https://doi.org/10.1016/j.midw.2013.05.005> PMID: 23815885
255. Chiu YK, Sun YC, Wang YW, Yeh JI. Establishing a community-run GP-supervised self-care program for minor illnesses in remote areas in Taiwan: an observational study. *Fam Pract*. 2012; 29(3):338–44. <https://doi.org/10.1093/fampra/cmr090> PMID: 22024664
256. Clark CE, Taylor RS, Shore AC, Campbell JL. The difference in blood pressure readings between arms and survival: primary care cohort study. *BMJ*. 2012; 344(7851):1462–19. <https://doi.org/10.1136/bmj.e1327> PMID: 22433975
257. Hussain J, Robinson A, Stebbing M, McGrail M. More is more in remote Central Australia: more provision of primary healthcare services is associated with more acute medical evacuations and more remote telephone consultations. *Rural Remote Health*. 2014; 14(4):2796–2796. PMID: 25391688
258. Kessler R. Mental health care treatment initiation when mental health services are incorporated into primary care practice. *J Am Board Fam Med*. 2012; 25(2):255–9. <https://doi.org/10.3122/jabfm.2012.02.100125> PMID: 22403211
259. Kluhsman BC, Lengerich EJ, Fleisher L, Paskett ED, Miller-Halegoua SM, Balshem A, et al. A pilot study for using fecal immunochemical testing to increase colorectal cancer screening in Appalachia, 2008–2009. *Prev Chronic Dis*. 2012; 9:E77–E77. PMID: 22482136
260. Lawson B, Dicks D, MacDonald L, Burge F. Using Quality Indicators to Evaluate the Effect of Implementing an Enhanced Collaborative Care Model among a Community, Primary Healthcare Practice Population. *Nurs Leadersh*. 2012; 25(3):28–42. <https://doi.org/10.12927/cjnl.2013.23057> PMID: 23010918
261. Mashari AMD, Minty RMD, Minty L, Hopman WMMA, Kelly LMDMcSFF. Epidural steroid injections for low back pain in rural practice: a 5-year retrospective study. *Can J Rural Med*. 2012; 17(4):127–34. PMID: 23017344
262. Pathman DE, Konrad TR. Growth and changes in the National Health Service Corps (NHSC) workforce with the American Recovery and Reinvestment Act. *J Am Board Fam Med*. 2012; 25(5):723–33. <https://doi.org/10.3122/jabfm.2012.05.110261> PMID: 22956708

263. Robinson TW. Western Acupuncture in a NHS General Practice: Anonymized 3-Year Patient Feedback Survey. *J Altern Complement Med N Y N*. 2012; 18(6):555–60.
264. Albert S, Brason FW II, Sanford CK, Dasgupta N, Graham J, Lovette B. Project Lazarus: Community-Based Overdose Prevention in Rural North Carolina. *Pain Med Malden Mass*. 2011; 12(s2):S77–85. <https://doi.org/10.1111/j.1526-4637.2011.01128.x> PMID: 21668761
265. Bender BG, Dickinson P, Rankin A, Wamboldt FS, Zittleman L, Westfall JM. The Colorado Asthma Toolkit Program: a practice coaching intervention from the High Plains Research Network. *J Am Board Fam Med*. 2011; 24(3):240–8. <https://doi.org/10.3122/jabfm.2011.03.100171> PMID: 21551395
266. Burgess CP, Baillie RS, Connors CM, Chenhall RD, McDermott RA, O’Dea K, et al. Early identification and preventive care for elevated cardiovascular disease risk within a remote Australian Aboriginal primary health care service. *BMC Health Serv Res*. 2011; 11(1):24–24. <https://doi.org/10.1186/1472-6963-11-24> PMID: 21281520
267. Farmer J, Currie M, Hyman J, West C, Arnott N. Evaluation of physician assistants in National Health Service Scotland. *Scott Med J*. 2011; 56(3):130–4. <https://doi.org/10.1258/smj.2011.011109> PMID: 21873716
268. Nilsen G, Huemer J, Eriksen L. Bachelor studies for nurses organised in rural contexts—a tool for improving the health care services in circumpolar region? *Int J Circumpolar Health*. 2012; 71(1):1–8.
269. Pape GA, Hunt JS, Butler KL, Siemienczuk J, Leblanc BH, Gillanders W, et al. Team-Based Care Approach to Cholesterol Management in Diabetes Mellitus: 2-Year Cluster Randomized Controlled Trial. *Arch Intern Med* 1960. 2011; 171(16):1480–6.
270. Quinn KJ, Kane KY, Stevermer JJ, Webb WD, Porter JL, Williamson JHA, et al. Influencing residency choice and practice location through a longitudinal rural pipeline program. *Acad Med*. 2011; 86(11):1397–406. <https://doi.org/10.1097/ACM.0b013e318230653f> PMID: 21952065
271. Rabinowitz HK, Diamond JJ, Markham FW, Santana AJ. Increasing the supply of women physicians in rural areas: outcomes of a medical school rural program. *J Am Board Fam Med*. 2011; 24(6):740–4. <https://doi.org/10.3122/jabfm.2011.06.110037> PMID: 22086818
272. Rabinowitz HK, Diamond JJ, Markham FW, Santana AJ. Increasing the supply of rural family physicians: recent outcomes from Jefferson Medical College’s Physician Shortage Area Program (PSAP). *Acad Med*. 2011; 86(2):264–9. <https://doi.org/10.1097/ACM.0b013e31820469d6> PMID: 21169776
273. Armstrong SJ, Small RE. The paradox of screening: rural women’s views on screening for postnatal depression. *BMC Public Health*. 2010; 10(1):744–744. <https://doi.org/10.1186/1471-2458-10-744> PMID: 21122148
274. Burnham RMsMDF, Day JMDC, Dudley WP. Multidisciplinary chronic pain management in a rural Canadian setting. *Can J Rural Med*. 2010; 15(1):7–13. PMID: 20070924
275. Denewer A, Hussein O, Farouk O, Elnahas W, Khater A, El-Saed A. Cost-Effectiveness of Clinical Breast Assessment-Based Screening in Rural Egypt. *World J Surg*. 2010; 34(9):2204–10. <https://doi.org/10.1007/s00268-010-0620-3> PMID: 20533039
276. Fiss T, Ritter CA, Alte D, van den Berg N, Hoffmann W. Detection of drug related problems in an interdisciplinary health care model for rural areas in Germany. *Pharm World Sci*. 2010; 32(5):566–74. <https://doi.org/10.1007/s11096-010-9409-6> PMID: 20593238
277. Gray D, Armstrong CD, Dahrouge S, Hogg W, Zhang W. Cost-effectiveness of Anticipatory and Preventive multidisciplinary Team Care for complex patients Evidence from a randomized controlled trial. *Can Fam Physician*. 2010; 56(1):e20–9. PMID: 20090057
278. Larson A, Ward J, Ross L, Whyatt D, Weatherston M, Landau L. Impact of Structured Education and Self Management on Rural Asthma Outcomes. *Aust Fam Physician*. 2010; 39(3):141–4. PMID: 20369116
279. Matsumoto M, Inoue K, Kajii E. Policy implications of a financial incentive programme to retain a physician workforce in underserved Japanese rural areas. *Soc Sci Med* 1982. 2010; 71(4):667–71. <https://doi.org/10.1016/j.socscimed.2010.05.006> PMID: 20542362
280. Noknoy S, Rangsin R, Saengchamchai P, Tantibhaedhyangkul U, McCambridge J. RCT of Effectiveness of Motivational Enhancement Therapy Delivered by Nurses for Hazardous Drinkers in Primary Care Units in Thailand. *Alcohol Alcohol Oxf*. 2010; 45(3):263–70. <https://doi.org/10.1093/alcalc/agq013> PMID: 20236990
281. Orrantia EMDMsCF, Poole HBs, Jessica SBsMD, Barbara ZMDC. Evaluation of a novel model for rural obstetric care. *Can J Rural Med*. 2010; 15(1):14–8. PMID: 20070925
282. Perkins D, Hamilton M, Saurman E, Luland T, Alpren C, Lyle D. GP Clinic: Promoting access to primary health care for mental health service clients. *Aust J Rural Health*. Accepted for publication 28 September 2010. 2010; 18(6):217–22. <https://doi.org/10.1111/j.1440-1584.2010.01159.x> PMID: 21114697

283. Straume K, Søndena MS, Prydz P. Postgraduate training at the ends of the earth—a way to retain physicians? *Rural Remote Health*. 2010; 10(2):1356–1356. PMID: [20572748](#)
284. Xin Z, Yuan J, Hua L, Ma YH, Zhao L, Lu Y, et al. A simple tool detected diabetes and prediabetes in rural Chinese. *J Clin Epidemiol*. 2010; 63(9):1030–5. <https://doi.org/10.1016/j.jclinepi.2009.11.012> PMID: [20189761](#)
285. Andrews RM, Kearns T, Connors C, Parker C, Carville K, Currie BJ, et al. A regional initiative to reduce skin infections amongst aboriginal children living in remote communities of the Northern Territory, Australia. *PLoS Negl Trop Dis*. 2009; 3(11):e554–e554. <https://doi.org/10.1371/journal.pntd.0000554> PMID: [19936297](#)
286. Balcázar H, Alvarado M, Cantu F, Pedregon V, Fulwood R. A promotora de salud model for addressing cardiovascular disease risk factors in the US-Mexico border region. *Prev Chronic Dis*. 2009; 6(1):A02–A02. PMID: [19080008](#)
287. Deprez R, Kinner A, Millard P, Baggott L, Mellett J, Loo JL. Improving Quality of Care for Patients with Chronic Obstructive Pulmonary Disease. *Popul Health Manag*. 2009; 12(4):209–15. <https://doi.org/10.1089/pop.2008.0043> PMID: [19663624](#)
288. Ellerbeck EF, Mahnken JD, Cupertino AP, Cox LS, Greiner KA, Mussulman LM, et al. Impact of Varying Levels of Disease Management on Smoking Cessation: A Randomized Trial. *Ann Intern Med*. 2009; 150(7):437–46.
289. Hogg W, Lemelin J, Dahrouge S, Liddy C, Armstrong CD, Legault F, et al. Randomized controlled trial of Anticipatory and Preventive multidisciplinary Team Care For complex patients in a community-based primary care setting. *Can Fam Physician*. 2009; 55(12):e76–85. PMID: [20008582](#)
290. Kavanagh D, Connolly JM. Mailed treatment to augment primary care for alcohol disorders: A randomized controlled trial. *Drug Alcohol Rev*. Received 9 June 2008; accepted for publication 29 September 2008. 2009; 28(1):73–80. <https://doi.org/10.1111/j.1465-3362.2008.00011.x> PMID: [19320679](#)
291. Kengne AP, Fezeu L, Sobngwi E, Awah PK, Aspray TJ, Unwin NC, et al. Type 2 diabetes management in nurse-led primary healthcare settings in urban and rural Cameroon. *Prim Care Diabetes*. 2009; 3(3):181–8. <https://doi.org/10.1016/j.pcd.2009.08.005> PMID: [19748331](#)
292. King AB, Wolfe GS. Evaluation of a diabetes specialist-guided primary care diabetes treatment program. *J Am Acad Nurse Pract*. Received: June 2007; accepted: November 2007. 2009; 21(1):24–30. <https://doi.org/10.1111/j.1745-7599.2008.00370.x> PMID: [19125892](#)
293. Kirkbride K, Wallace N. Rural Health Clinics and Diabetes-Related Primary Care for Medicaid Beneficiaries in Oregon. *J Rural Health*. 2009; 25(3):247–52. <https://doi.org/10.1111/j.1748-0361.2009.00226.x> PMID: [19566609](#)
294. Murchie P, Delaney EK, Campbell NC, Hannaford PC. GP-led melanoma follow-up: the practical experience of GPs. *Fam Pract*. 2009; 26(4):317–24. <https://doi.org/10.1093/fampra/cmp035> PMID: [19535735](#)
295. Pastel LC, Liu S, Homa K, Bradley E, Batalden P. Improving Care for Patients With Diabetes at a Rural Primary Care Clinic by Empowering Licensed Nursing Assistants With a Flow Sheet Tool. *Clin Diabetes*. 2009; 27(3):115–8.
296. Probst JC, Laditka JN, Laditka SB. Association between community health center and rural health clinic presence and county-level hospitalization rates for ambulatory care sensitive conditions: an analysis across eight US states. *BMC Health Serv Res*. 2009; 9(1):134–134. <https://doi.org/10.1186/1472-6963-9-134> PMID: [19646234](#)
297. Reynolds MAH. Postoperative Pain Management Discharge Teaching in a Rural Population. *Pain Manag Nurs*. 2009; 10(2):76–84. <https://doi.org/10.1016/j.pmn.2008.07.003> PMID: [19481046](#)
298. Scrace M, Margolis SA. The Royal Flying Doctor Service primary care skin cancer clinic: a pilot program for remote Australia. *Rural Remote Health*. 2009; 9(1):1048–1048. PMID: [19239334](#)
299. Thomson RM, Crengle S, Lawrenson R. Improving participation in breast screening in a rural general practice with a predominately Maori population. *N Z Med J*. 2009; 122(1291):39–47. PMID: [19322254](#)
300. Ding D, Hong Z, Chen G, Dai X, Wu J, Wang W, et al. Primary care treatment of epilepsy with phenobarbital in rural China: Cost-outcome analysis from the WHO/ILAE/IBE global campaign against epilepsy demonstration project. *Epilepsia Cph*. 2008; 49(3):535–9. [https://doi.org/10.1111/j.1528-1167.2007.01529\\_2.x](https://doi.org/10.1111/j.1528-1167.2007.01529_2.x) PMID: [18302628](#)
301. Ely AC, Baniitt A, Befort C, Hou Q, Rhode PC, Grund C, et al. Kansas Primary Care Weighs In: A Pilot Randomized Trial of a Chronic Care Model Program for Obesity in 3 Rural Kansas Primary Care Practices. *J Rural Health*. 2008; 24(2):125–32. <https://doi.org/10.1111/j.1748-0361.2008.00148.x> PMID: [18397445](#)

302. Glasser M, Hunsaker M, Sweet K, MacDowell M, Meurer M. A comprehensive medical education program response to rural primary care needs. *Acad Med*. 2008; 83(10):952–61. <https://doi.org/10.1097/ACM.0b013e3181850a02> PMID: 18820528
303. Lane DS, Messina CR, Cavanagh MF, Chen JJ. A Provider Intervention to Improve Colorectal Cancer Screening in County Health Centers. *Med Care*. 2008; 46(9):S109–16. <https://doi.org/10.1097/MLR.0b013e31817d3fcf> PMID: 18725822
304. Matsumoto M, Inoue K, Kajii E. Long-term effect of the home prefecture recruiting scheme of Jichi Medical University, Japan. *Rural Remote Health*. 2008; 8(3):930–930. PMID: 18643712
305. Pereira J, Palacios M, Collin T, Wedel R, Galloway L, Murray A, et al. The impact of a hybrid online and classroom-based course on palliative care competencies of family medicine residents. *Palliat Med*. 2008; 22(8):929–37. <https://doi.org/10.1177/0269216308094561> PMID: 18772211
306. Pomerantz AMD, Cole BHMAMPH, Watts BVMDMPH, Weeks WBMDMBA. Improving efficiency and access to mental health care: combining integrated care and advanced access. *Gen Hosp Psychiatry*. 2008; 30(6):546–51. <https://doi.org/10.1016/j.genhosppsych.2008.09.004> PMID: 19061681
307. Saini B, Filipovska J, Bosnic-Anticevich S, Taylor S, Krass I, Armour C. An evaluation of a community pharmacy-based rural asthma management service. *Aust J Rural Health*. Accepted for publication 3 January 2008. 2008; 16(2):100–8. <https://doi.org/10.1111/j.1440-1584.2008.00975.x> PMID: 18318852
308. Sears JM, Wickizer TM, Franklin GM, Cheadle AD, Berkowitz B. Expanding the Role of Nurse Practitioners: Effects on Rural Access to Care for Injured Workers. *J Rural Health*. 2008; 24(2):171–8. <https://doi.org/10.1111/j.1748-0361.2008.00154.x> PMID: 18397452
309. Tyler DO, Horner SD. Collaborating With Low-Income Families and Their Overweight Children to Improve Weight-Related Behaviors: An Intervention Process Evaluation. *J Spec Pediatr Nurs*. First received August 29, 2007; Revision received April 5, 2008; Accepted for publication April 12, 2008. 2008; 13(4):263–74. <https://doi.org/10.1111/j.1744-6155.2008.00167.x> PMID: 19238714
310. Aghajanian A, Mehryar AH, Ahmadnia S, Kazemipour S. Impact of rural health development programme in the Islamic Republic of Iran on rural-urban disparities in health indicators/Impact du programme de developpement de la sante en secteur rural en Republique islamique d'Iran sur les disparites des indicateurs de sante entre les milieux rural et urbain. *East Mediterr Health J*. 2007; 13(6):1466.
311. Beckham N. Motivational interviewing with hazardous drinkers. *J Am Acad Nurse Pract*. Received: July 2005; accepted: September 2006. 2007; 19(2):103–10. <https://doi.org/10.1111/j.1745-7599.2006.00200.x> PMID: 17300536
312. Cullum S, Tucker S, Todd C, Brayne C. Effectiveness of liaison psychiatric nursing in older medical inpatients with depression: a randomised controlled trial. *Age Ageing*. 2007; 36(4):436–42. <https://doi.org/10.1093/ageing/afm058> PMID: 17537739
313. Florence JA, Goodrow B, Wachs J, Grover S, Olive KE. Rural Health Professions Education at East Tennessee State University: Survey of Graduates From the First Decade of the Community Partnership Program. *J Rural Health*. 2007; 23(1):77–83. <https://doi.org/10.1111/j.1748-0361.2006.00071.x> PMID: 17300482
314. Hodgins G, Judd F, Davis J, Fahey A. An integrated approach to general practice mental health training: the importance of context. *Australas Psychiatry Bull R Aust N Z Coll Psychiatr*. 2007; 15(1):52–7. <https://doi.org/10.1080/10398560601083019> PMID: 17464636
315. Laatikainen T, Dunbar JA, Chapman A, Kilkkinen A, Vartiainen E, Heistaro S, et al. Prevention of type 2 diabetes by lifestyle intervention in an Australian primary health care setting: Greater Green Triangle (GGT) Diabetes Prevention Project. *BMC Public Health*. 2007; 7(1):249–249.
316. Liaw ST, Sulaiman ND, Barton CA, Chondros P, Harris CA, Sawyer S, et al. An interactive workshop plus locally adapted guidelines can improve general practitioners asthma management and knowledge: a cluster randomised trial in the Australian setting. *BMC Fam Pract*. 2008; 9(1):22–22. <https://doi.org/10.1186/1471-2296-9-22> PMID: 18423050
317. McCrae CSPD, McGovern RPD, Lukefahr RMA, Stripling AMBS. Research Evaluating Brief Behavioral Sleep Treatments for Rural Elderly (RESTORE): A Preliminary Examination of Effectiveness. *Am J Geriatr Psychiatry*. 2007; 15(11):979–82. <https://doi.org/10.1097/JGP.0b013e31813547e6> PMID: 17974868
318. Mitton C, O'Neil D, Simpson L, Hoppins Y, Harcus S. Nurse–Physician Collaborative Partnership: a rural model for the chronically ill. *Can J Rural Med*. 2007; 12(4):208–16. PMID: 18076814
319. Riou F, Piette C, Durand G, Chaperon J. Results of a 12-month quality-circle prescribing improvement programme for GPs. *Br J Gen Pract*. 2007; 57(540):574–6. PMID: 17727751

320. Sherman BJ, Gilliland G, Speckman JL, Freund KM. The effect of a primary care exercise intervention for rural women. *Prev Med*. 2006; 44(3):198–201. <https://doi.org/10.1016/j.ypmed.2006.10.009> PMID: 17184830
321. Sutor B, Agerter DC. Collaborative psychiatric care in a rural family medicine setting reduces health care utilization in depressed patients. *Minn Med*. 2007; 90(1):39–41. PMID: 17305104
322. Watkins KW, Saunders RP, Luchok K, Martin AB, Crawford S, Smith G, et al. Medical Homes for Children with Special Health Care Needs. *J Health Care Poor Underserved*. 2007; 18(4):916–916.
323. Ackermann EW, Mitchell GK. An audit of structured diabetes care in a rural general practice. *Med J Aust*. 2006; 185(2):69–72. <https://doi.org/10.5694/j.1326-5377.2006.tb00473.x> PMID: 16842058
324. Adams SJ, Xu S, Dong F, Fortney J, Rost K. Differential Effectiveness of Depression Disease Management for Rural and Urban Primary Care Patients. *J Rural Health*. 2006; 22(4):343–50. <https://doi.org/10.1111/j.1748-0361.2006.00056.x> PMID: 17010032
325. Ahles TA, Wasson JH, Seville JL, Johnson DJ, Cole BF, Hanscom B, et al. A controlled trial of methods for managing pain in primary care patients with or without co-occurring psychosocial problems. *Ann Fam Med*. 2006; 4(4):341–50. <https://doi.org/10.1370/afm.527> PMID: 16868238
326. Belkora J, Katapodi M, Moore D, Franklin L, Hopper K, Esserman L. Evaluation of a visit preparation intervention implemented in two rural, underserved counties of Northern California. *Patient Educ Couns*. 2006; 64(1):350–9. <https://doi.org/10.1016/j.pec.2006.03.017> PMID: 16904859
327. Dunbabin JS, McEwin K, Cameron I. Postgraduate medical placements in rural areas: their impact on the rural medical workforce. *Rural Remote Health*. 2006; 6(2):481–481. PMID: 16594864
328. Gardiner M, Sexton R, Kearns H, Marshall K. Impact of support initiatives on retaining rural general practitioners. *Aust J Rural Health*. Accepted for publication 1 July 2006. 2006; 14(5):196–201. <https://doi.org/10.1111/j.1440-1584.2006.00808.x> PMID: 17032295
329. Haase R, Russell S. Improving Diabetes Care and Outcomes in a Rural Primary Care Clinic. *Jt Comm J Qual Patient Saf*. 2006; 32(5):246–52. [https://doi.org/10.1016/s1553-7250\(06\)32032-6](https://doi.org/10.1016/s1553-7250(06)32032-6) PMID: 16761788
330. Kelaher M, Dunt D, Taylor-Thomson D, Harrison N, O'Donoghue L, Barnes T, et al. Improving access to medicines among clients of remote area Aboriginal and Torres Strait Islander Health Services. *Aust N Z J Public Health*. Revision requested: September 2005 Accepted: November 2005. 2006; 30(2):177–83. <https://doi.org/10.1111/j.1467-842x.2006.tb00113.x> PMID: 16681341
331. Kilkkinen A, Heistaro S, Laatikainen T, Janus E, Chapman A, Absetz P, et al. Prevention of type 2 diabetes in a primary health care setting. Interim results from the Greater Green Triangle (GGT) Diabetes Prevention Project. *Diabetes Res Clin Pract*. 2007; 76(3):460–2. <https://doi.org/10.1016/j.diabres.2006.09.027> PMID: 17069921
332. Meng X, Anderson AF, Hou X, Wang Y, Sun L, Zhang X, et al. A pilot project for the effective delivery of HAART in rural China. *AIDS Patient Care STDs*. 2006; 20(3):213–9. <https://doi.org/10.1089/apc.2006.20.213> PMID: 16548718
333. Oyama H, Goto M, Fujita M, Shibuya H, Sakashita T. Preventing Elderly Suicide Through Primary Care by Community-Based Screening for Depression in Rural Japan. *Crisis J Crisis Interv Suicide Prev*. 2006; 27(2):58–65. <https://doi.org/10.1027/0227-5910.27.2.58> PMID: 16913326
334. Tobe SW, Pylypchuk G, Wentworth J, Kiss A, Szalai JP, Perkins N, et al. Effect of nurse-directed hypertension treatment among First Nations people with existing hypertension and diabetes mellitus: the Diabetes Risk Evaluation and Microalbuminuria (DREAM 3) randomized controlled trial. *Can Med Assoc J CMAJ*. 2006; 174(9):1267–71. <https://doi.org/10.1503/cmaj.050030> PMID: 16595786
335. Wang WZ, Wu JZ, Ma GY, Dai XY, Yang B, Wang TP, et al. Efficacy assessment of phenobarbital in epilepsy: a large community-based intervention trial in rural China. *Lancet Neurol*. 2006; 5(1):46–52. [https://doi.org/10.1016/S1474-4422\(05\)70254-4](https://doi.org/10.1016/S1474-4422(05)70254-4) PMID: 16361022
336. Bergus GR, Hartz AJ, Noyes R Jr, Ward MM, James PA, Vaughn T, et al. The Limited Effect of Screening for Depressive Symptoms With the PHQ-9 in Rural Family Practices. *J Rural Health*. 2005; 21(4):303–9. <https://doi.org/10.1111/j.1748-0361.2005.tb00099.x> PMID: 16294652
337. Bray P, Roupe M, Young S, Harrell J, Cummings DM, Whetstone LM. Feasibility and effectiveness of system redesign for diabetes care management in rural areas: the eastern North Carolina experience. *Diabetes Educ*. 2005; 31(5):712–8. <https://doi.org/10.1177/0145721705280830> PMID: 16203855
338. Bray P, Thompson D, Wynn JD, Cummings DM, Whetstone L. Confronting Disparities in Diabetes Care: The Clinical Effectiveness of Redesigning Care Management for Minority Patients in Rural Primary Care Practices. *J Rural Health*. 2005; 21(4):317–21. <https://doi.org/10.1111/j.1748-0361.2005.tb00101.x> PMID: 16294654

339. Campbell A. The evaluation of a model of primary mental health care in rural Tasmania. *Aust J Rural Health*. Accepted for publication February 2005. 2005; 13(3):142–8. <https://doi.org/10.1111/j.1440-1854.2005.00694.x> PMID: 15932483
340. Dettori N, Flook BN, Pessi E, Quesenberry K, Loh J, Harris C, et al. Improvements in Care and Reduced Self-management Barriers Among Rural Patients With Diabetes. *J Rural Health*. 2005; 21(2):172–7. <https://doi.org/10.1111/j.1748-0361.2005.tb00078.x> PMID: 15859055
341. Farmer JE, Clark MJ, Sherman A, Marien WE, Selva TJ. Comprehensive Primary Care for Children With Special Health Care Needs in Rural Areas. *Pediatr Evancst*. 2005; 116(3):649–56. <https://doi.org/10.1542/peds.2004-0647> PMID: 16140704
342. Hughes K, Leggett B, Mar CD, Croese J, Fairley S, Masson J, et al. Guaiac versus immunochemical tests: faecal occult blood test screening for colorectal cancer in a rural community. *Aust N Z J Public Health*. Revision requested: October 2004 Accepted: June 2005. 2005; 29(4):358–64. <https://doi.org/10.1111/j.1467-842x.2005.tb00207.x> PMID: 16222934
343. Johnson EA, Webb WL, McDowall JM, Chasson LL, Oser CS, Grandpre JR, et al. A field-based approach to support improved diabetes care in rural states. *Prev Chronic Dis*. 2005; 2(4):A08–A08. PMID: 16164812
344. Pacheco M, Weiss D, Vaillant K, Bachofer S, Garrett B, Dodson rd WH, et al. The impact on rural New Mexico of a family medicine residency. *Acad Med*. 2005; 80(8):739–44. <https://doi.org/10.1097/00001888-200508000-00007> PMID: 16043528
345. Rabinowitz HK, Diamond JJ, Markham FW, Rabinowitz C. Long-term retention of graduates from a program to increase the supply of rural family physicians. *Acad Med*. 2005; 80(8):728–32. <https://doi.org/10.1097/00001888-200508000-00004> PMID: 16043525
346. Reymond L, Charles M, Israel F, Read T, Treston P. A strategy to increase the palliative care capacity of rural primary health care providers. *Aust J Rural Health*. Accepted for publication November 2004. 2005; 13(3):156–61. <https://doi.org/10.1111/j.1440-1854.2005.00687.x> PMID: 15932485
347. Siminerio LM, Piatt G, Zgibor JC. Implementing the Chronic Care Model for Improvements in Diabetes Care and Education in a Rural Primary Care Practice. *Diabetes Educ*. 2005; 31(2):225–34. <https://doi.org/10.1177/0145721705275325> PMID: 15797851
348. Vivilaki V, Romanidou A, Theodorakis P, Lionis C. Are health education meetings effective in recruiting women in cervical screening programmes? An innovative and inexpensive intervention from the island of Crete. *Rural Remote Health*. 2005; 5(2):376–376. PMID: 15946107
349. Askim T, Rohweder G, Lydersen S, Indredavik B. Evaluation of an extended stroke unit service with early supported discharge for patients living in a rural community. A randomized controlled trial. *Clin Rehabil*. 2004; 18(3):238–48. <https://doi.org/10.1191/0269215504cr752oa> PMID: 15137554
350. Bowden JM, Shaul MP, Bennett JA. The Process of Changing Health Risk Behaviors: An Oregon Rural Clinic Experience. *J Am Acad Nurse Pract*. 2004; 16(9):411–7. <https://doi.org/10.1111/j.1745-7599.2004.tb00391.x> PMID: 15495695
351. Cowan S, Ernst P, Cartier A, Boulet LP. A population-based evaluation of a regional asthma education centre. *Can Respir J*. 2004; 11(1):39–44. <https://doi.org/10.1155/2004/425257> PMID: 15010731
352. Edwards A, Elwyn G, Hood K, Atwell C, Robling M, Houston H, et al. Patient-based outcome results from a cluster randomized trial of shared decision making skill development and use of risk communication aids in general practice. *Fam Pract*. 2004; 21(4):347–54. <https://doi.org/10.1093/fampra/cmh402> PMID: 15249521
353. Graffen M, Kennedy D, Simpson M. Quality use of medicines in the rural ambulant elderly: a pilot study. *Rural Remote Health*. 2004; 4(3):40.8KB. PMID: 15885009
354. Lee T, Ko IS, Jeong SH. Is an expanded nurse role economically viable? *J Adv Nurs*. Submitted for publication 7 October 2002 Accepted for publication 18 December 2003. 2004; 46(5):471–9. <https://doi.org/10.1111/j.1365-2648.2004.03021.x> PMID: 15139935
355. Lin T, Chen CH, Chou P. Impact of the high-risk and mass strategies on hypertension control and stroke mortality in primary health care. *J Hum Hypertens*. 2004; 18(2):97–105. <https://doi.org/10.1038/sj.jhh.1001642> PMID: 14730324
356. Maddigan SL, Majumdar SR, Guirguis LM, Lewanczuk RZ, Lee TK, Toth EL, et al. Improvements in patient-reported outcomes associated with an intervention to enhance quality of care for rural patients with type 2 diabetes results of a controlled trial. *Diabetes Care*. 2004; 27(6):1306–12. <https://doi.org/10.2337/diacare.27.6.1306> PMID: 15161780
357. Santos D, Gillies J, Vartiainen E, Dunbar J, Nettleton B. Implementing the evidence: a disease management system for secondary prevention of coronary heart disease in the Scottish Borders. *Qual Prim Care*. 2004; 12(1):65–72.

358. Elley CR, Kerse N, Arroll B, Robinson E. Effectiveness of counselling patients on physical activity in general practice: cluster randomised controlled trial. *BMJ*. 2003; 326(7393):793–6. <https://doi.org/10.1136/bmj.326.7393.793> PMID: 12689976
359. Goldhaber-Fiebert JD, Goldhaber-Fiebert SN, Tristan ML, Nathan DM. Randomized Controlled Community-Based Nutrition and Exercise Intervention Improves Glycemia and Cardiovascular Risk Factors in Type 2 Diabetic Patients in Rural Costa Rica. *Diabetes Care*. 2003; 26(1):24–9. <https://doi.org/10.2337/diacare.26.1.24> PMID: 12502654
360. Goldstein L, Doig CJ, Bates S, Rink S, Kortbeek JB. Adopting the pre-hospital index for interfacility helicopter transport: a proposal. *Injury*. 2003; 34(1):3–11. [https://doi.org/10.1016/s0020-1383\(02\)00082-7](https://doi.org/10.1016/s0020-1383(02)00082-7) PMID: 12531370
361. Jackson J, Shannon CK, Pathman DE, Mason E, Nemitz JW. A Comparative Assessment of West Virginia's Financial Incentive Programs for Rural Physicians. *J Rural Health*. 2003; 19(S5):329–39. <https://doi.org/10.1111/j.1748-0361.2003.tb01052.x> PMID: 14526516
362. Kit JA, x CP, y PWH, s JC, y MB, s PDM, et al. Chronic disease self-management in Aboriginal Communities: Towards a sustainable program of care in rural communities. *Aust J Prim Health*. 2003; 9(3):168–76.
363. Majumdar SR, Guirguis LM, Toth EL, Lewanczuk RZ, Lee TK, Johnson JA. Controlled Trial of a Multifaceted Intervention for Improving Quality of Care for Rural Patients With Type 2 Diabetes. *Diabetes Care*. 2003; 26(11):3061–6. <https://doi.org/10.2337/diacare.26.11.3061> PMID: 14578240
364. Naccarella L. Evaluation of the rural South Australian Tri-division Adolescent Health Project. *Aust J Rural Health*. Accepted for publication 17 June 2002. 2003; 11(3):116–20. PMID: 12950393
365. Simmons D. Impact of an integrated approach to diabetes care at the Rumbalara Aboriginal Health Service. *Intern Med J*. Received 28 August 2002; accepted 28 January 2003. 2003; 33(12):581–5. <https://doi.org/10.1111/j.1445-5994.2003.00491.x> PMID: 14656232
366. Taylor CT, Byrd DC, Krueger K. Improving primary care in rural Alabama with a pharmacy initiative. *Am J Health Syst Pharm*. 2003; 60(11):1123–9. <https://doi.org/10.1093/ajhp/60.11.1123> PMID: 12816022
367. Arthur AJ, Matthews RJ, Jagger C, Clarke M, Hipkin A, Bennison DP. Improving uptake of influenza vaccination among older people: a randomised controlled trial. *Br J Gen Pract*. 2002; 52(482):717–22. PMID: 12236274
368. Elliott TE, Elliott BA, Regal RR, Renier CM, Haller IV, Crouse BJ, et al. Lake Superior Rural Cancer Care Project. *Cancer Pract*. 2002; 10(2):75–84.
369. James EL, Talbot L, Fishley C. Does external support from divisions increase preventive activities in rural Australian general practice? *Aust Fam Physician*. 2003; 32(12):1044–6. PMID: 14708160
370. Maislos M, Weisman D, Sherf M. Western Negev Mobile Diabetes Care Program: a model for interdisciplinary diabetes care in a semi-rural setting. *Acta Diabetol*. 2002; 39(1):49–53. <https://doi.org/10.1007/s005920200012> PMID: 12043939
371. Malcolm H. PRIMARY MENTAL HEALTH-CARE MODEL IN RURAL TASMANIA: OUTCOMES FOR PATIENTS. *Aust J Rural Health*. Accepted for publication February 2001. 2002; 10(1):20–5. <https://doi.org/10.1046/j.1440-1584.2002.00394.x> PMID: 11952518
372. Walker J, Mathers N. The impact of a general practice group intervention on prescribing costs and patterns. *Br J Gen Pract*. 2002; 52(476):181–6. PMID: 12030659
373. Ahles TA, Seville J, Wasson J, Johnson D, Callahan E, Stukel TA. Panel-Based Pain Management in Primary Care: A Pilot Study. *J Pain Symptom Manage*. 2001; 22(1):584–90.
374. Cave AJ, Wright A, Dorrett J, McErlain M. Evaluation of a Nurse-run asthma clinic in general practice. *Prim Care Respir J*. 2001; 10(3):65–8. <https://doi.org/10.1038/pcrj.2001.21> PMID: 31700281
375. Kempe A, Steiner JF, Renfrew BL, Lowery E, Haas K, Berman S. How Much Does a Regional Immunization Registry Increase Documented Immunization Rates at Primary Care Sites in Rural Colorado? *Ambul Pediatr Off J Ambul Pediatr Assoc*. 2001; 1(4):213–6. [https://doi.org/10.1367/1539-4409\(2001\)001%3C0213:hmdar%3E2.0.co;2](https://doi.org/10.1367/1539-4409(2001)001%3C0213:hmdar%3E2.0.co;2) PMID: 11888403
376. Mayer-Davis EJ, D'Antonio A, Martin M, Wandersman A, Parra-Medina D, Schulz R. Pilot Study of Strategies for Effective Weight Management in Type 2 Diabetes: Pounds Off with Empowerment (POWER). *Fam Community Health*. 2001; 24(2):27–35. <https://doi.org/10.1097/00003727-200107000-00006> PMID: 11373164
377. McDermott RA, Schmidt BA, Sinha A, Mills P. Improving diabetes care in the primary healthcare setting: a randomised cluster trial in remote Indigenous communities. *Med J Aust*. 2001; 174(10):497–502. <https://doi.org/10.5694/j.1326-5377.2001.tb143397.x> PMID: 11419768
378. O'Grady A, Simmons D, Tupe S, Hewlett G. Effectiveness of changes in the delivery of diabetes care in a rural community. *Aust J Rural Health*. 2001; 9(2):74–8. <https://doi.org/10.1046/j.1440-1584.2001.00336.x> PMID: 11259960

379. Rabinowitz HK, Diamond JJ, Markham FW, Paynter NP. Critical Factors for Designing Programs to Increase the Supply and Retention of Rural Primary Care Physicians. *JAMA J Am Med Assoc.* 2001; 286(9):1041–8. <https://doi.org/10.1001/jama.286.9.1041> PMID: 11559288
380. Van Amburgh JA, Waite NM, Hobson EH, Migden H. Improved Influenza Vaccination Rates in a Rural Population as a Result of a Pharmacist-Managed Immunization Campaign. *Pharmacotherapy.* 2001; 21(9):1115–22. <https://doi.org/10.1592/phco.21.13.1115.34624> PMID: 11560201
381. Weinehall L, Hellsten G, Boman K, Hallmans G, Asplund K, Wall S. Can a sustainable community intervention reduce the health gap?—10-Year evaluation of a Swedish community intervention program for the prevention of cardiovascular disease. *Scand J Public Health Suppl.* 2001; 56 (56\_suppl):59–68. PMID: 11681565
382. Anderko L, Robertson JF, Uscian MM. The Effectiveness of a Rural Nursing Center in Improving Health Care Access in a Three-County Area. *J Rural Health.* 2000; 16(2):177–84. <https://doi.org/10.1111/j.1748-0361.2000.tb00452.x> PMID: 10981370
383. Hippisley-Cox J, Pringle M. The cost-effectiveness of lipid lowering in patients with ischaemic heart disease: an intervention and evaluation in primary care. *Br J Gen Pract.* 2000; 50(458):699–705. PMID: 11050784
384. Shum C, Humphreys A, Wheeler D, Cochrane MA, Skoda S, Clement S. Nurse management of patients with minor illnesses in general practice: multicentre, randomised controlled trial. *BMJ.* 2000; 320(7241):1038–43. <https://doi.org/10.1136/bmj.320.7241.1038> PMID: 10764365
385. Smith JI, Rost KM, Nutting PA, Elliott CE, Duan N. A Primary Care Intervention for Depression. *J Rural Health.* 2000; 16(4):313–23. <https://doi.org/10.1111/j.1748-0361.2000.tb00482.x> PMID: 11218319
386. Thomas JC, Earp JA, Eng E. Evaluation and lessons learned from a lay health advisor programme to prevent sexually transmitted diseases. *Int J STD AIDS.* 2000; 11(12):812–8. <https://doi.org/10.1258/0956462001915336> PMID: 11138917
387. Johansson B, Berglund G, Glimelius B, Holmberg L, Sjöden PO. Intensified primary cancer care: a randomized study of home care nurse contacts. *J Adv Nurs.* 1999; 30(5):1137–46. <https://doi.org/10.1046/j.1365-2648.1999.01193.x> PMID: 10564413
388. Kinsinger LS, Harris R, Qaqish B, Strecher V, Kaluzny A. Using an office system intervention to increase breast cancer screening. *J Gen Intern Med JGIM.* 1998; 13(8):507–14. <https://doi.org/10.1046/j.1525-1497.1998.00160.x> PMID: 9734786
389. Carter BL, Barnette DJ, Chrischilles E, Mazzotti GJ, Asali ZJ. Evaluation of Hypertensive Patients after Care Provided by Community Pharmacists in a Rural Setting. *Pharmacotherapy.* 1997; 17(6):1274–85. PMID: 9399611
390. Keyserling TC, Ammerman AS, Davis CE, Mok MC, Garrett J, Simpson JR. A randomized controlled trial of a physician-directed treatment program for low-income patients with high blood cholesterol: the Southeast Cholesterol Project. *Arch Fam Med.* 1997; 6(2):135–45. <https://doi.org/10.1001/archfami.6.2.135> PMID: 9075448
391. Bornmann L, Mutz R. Growth rates of modern science: A bibliometric analysis based on the number of publications and cited references. *J Assoc Inf Sci Technol.* 2015; 66(11):2215–22.
392. Singh GKP, Siahpush MP. Widening Rural–Urban Disparities in Life Expectancy, U.S., 1969–2009. *Am J Prev Med.* 2014; 46(2):e19–29. <https://doi.org/10.1016/j.amepre.2013.10.017> PMID: 24439358
393. Singh GK, Daus GP, Allender M, Ramey CT, Martin EK, Perry C, et al. Social Determinants of Health in the United States: Addressing Major Health Inequality Trends for the Nation, 1935–2016. *Int J MCH AIDS.* 2017; 6(2):139–64. <https://doi.org/10.21106/ijma.236> PMID: 29367890
394. Di Angelantonio E, Kaptoge S, Wormser D, Willeit P, Butterworth AS, Bansal N, et al. Association of Cardiometabolic Multimorbidity With Mortality The Emerging Risk Factors Collaboration. *JAMA J Am Med Assoc.* 2015; 314(1):52–60.
395. Asghari S, Kirkland MC, Blackmore J, Boyd S, Farrell A, Rourke J, et al. A systematic review of reviews: Recruitment and retention of rural family physicians. *Can J Rural Med.* 2020; 25(1):20–30. [https://doi.org/10.4103/CJRM.CJRM\\_4\\_19](https://doi.org/10.4103/CJRM.CJRM_4_19) PMID: 31854339
396. Asghari S, Aubrey-Bassler K, Godwin M, Rourke J, Mathews M, Barnes P, et al. Factors influencing choice to practise in rural and remote communities throughout a physician's career cycle. (Original Article/Article Original). *Can J Rural Med.* 2017; 22(3):92.
